# Supplementary material for: Comparison of routine prenatal iron prophylaxis and screening and treatment for anaemia: pregnancy results and preliminary birth results from a pragmatic randomised controlled trial (PROFEG) in Maputo, Mozambique
Source: PubMed Central journal article supplement — BMJ Open. 2013 Feb 13;3(2):e001948. doi: 10.1136/bmjopen-2012-001948 (PMC3585968; doi:10.1136/bmjopen-2012-001948), 2013-02-13
Supplement: bmjopen-2012-001948.draft_revisions.pdf [file bmjopen-2012-001948.draft_revisions.pdf]

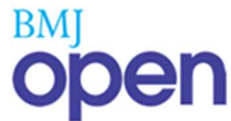

**Comparison of routine prenatal iron prophylaxis and screening and treatment for anemia: pregnancy results and preliminary birth from a pragmatic randomized controlled trial (PROFEG) in Maputo, Mozambique**

|                                 |                                                                                                                                                                                                                                                                                                                                                                                                                                                                                                                                                                                                                                                                                                                                                                                                                                                                                                             |
|---------------------------------|-------------------------------------------------------------------------------------------------------------------------------------------------------------------------------------------------------------------------------------------------------------------------------------------------------------------------------------------------------------------------------------------------------------------------------------------------------------------------------------------------------------------------------------------------------------------------------------------------------------------------------------------------------------------------------------------------------------------------------------------------------------------------------------------------------------------------------------------------------------------------------------------------------------|
| Journal:                        | <i>BMJ Open</i>                                                                                                                                                                                                                                                                                                                                                                                                                                                                                                                                                                                                                                                                                                                                                                                                                                                                                             |
| Manuscript ID:                  | bmjopen-2012-001948                                                                                                                                                                                                                                                                                                                                                                                                                                                                                                                                                                                                                                                                                                                                                                                                                                                                                         |
| Article Type:                   | Research                                                                                                                                                                                                                                                                                                                                                                                                                                                                                                                                                                                                                                                                                                                                                                                                                                                                                                    |
| Date Submitted by the Author:   | 10-Aug-2012                                                                                                                                                                                                                                                                                                                                                                                                                                                                                                                                                                                                                                                                                                                                                                                                                                                                                                 |
| Complete List of Authors:       | Parkkali, Saara; National Institute for Health and Welfare, Health Services and Policy Research<br>Nwaru, Bright; University of Tampere, School of Health Sciences<br>Abacassamo, Fatima; Eduardo Mondlane University, Department of Community Health<br>Salomé, Graca; Eduardo Mondlane University, Department of Biochemistry, Biology, Genetics and Molecular Biology<br>Augusto, Orvalho; Eduardo Mondlane University, Department of Community Health<br>Regushevskaya, Elena; National Institute for Health and Welfare, Health Services and Policy Research<br>Dgedge, Martinho; Ministry of Health,<br>Sousa, Cesar; Eduardo Mondlane University, Department of Community Health<br>Cliff, Julie; Eduardo Mondlane University, Department of Community Health<br>Chilundo, Baltazar; Eduardo Mondlane University, Department of Community Health<br>hemminki, elina; THL, Health and Social Services |
| <b>Primary Subject Heading</b>: | Health services research                                                                                                                                                                                                                                                                                                                                                                                                                                                                                                                                                                                                                                                                                                                                                                                                                                                                                    |
| Secondary Subject Heading:      | Epidemiology, Global health, Health policy, Health services research, Reproductive medicine, obstetrics and gynaecology                                                                                                                                                                                                                                                                                                                                                                                                                                                                                                                                                                                                                                                                                                                                                                                     |
| Keywords:                       | HIV & AIDS < INFECTIOUS DISEASES, Nutrition < TROPICAL MEDICINE, Community child health < PAEDIATRICS, PREVENTIVE MEDICINE, PUBLIC HEALTH, Epidemiology < TROPICAL MEDICINE                                                                                                                                                                                                                                                                                                                                                                                                                                                                                                                                                                                                                                                                                                                                 |
|                                 |                                                                                                                                                                                                                                                                                                                                                                                                                                                                                                                                                                                                                                                                                                                                                                                                                                                                                                             |

SCHOLARONE™  
Manuscripts

1  
2  
3 **Comparison of routine prenatal iron prophylaxis and screening and treatment for anemia:**  
4  
5 **pregnancy results and preliminary birth from a pragmatic randomized controlled trial**  
6  
7 **(PROFEG) in Maputo, Mozambique**  
8  
9

10  
11  
12  
13  
14 Saara Parkkali<sup>1</sup>, Fatima Abacassamo<sup>2</sup>, Bright I Nwaru<sup>3</sup>, Graca Salomé<sup>4</sup>, Orvalho Augusto<sup>2</sup>, Elena  
15 Regushevskaya<sup>1</sup>, Martinho Dgedge<sup>5</sup>, Cesar Sousa<sup>2</sup>, Julie Cliff<sup>2</sup>, Baltazar Chilundo<sup>2</sup>, Elina  
16 Hemminki<sup>1</sup>  
17  
18  
19

20  
21 <sup>1</sup>National Institute for Health and Welfare, Health Services and Policy Research, Helsinki, Finland  
22

23  
24 <sup>2</sup>Department of Community Health, Eduardo Mondlane University, Maputo, Mozambique  
25

26  
27 <sup>3</sup>School of Health Sciences, University of Tampere, Tampere, Finland  
28

29  
30 <sup>4</sup>Department of Biochemistry, Biology, Genetics and Molecular Biology, Eduardo Mondlane  
31 University, Maputo, Mozambique  
32  
33

34  
35 <sup>5</sup>Ministry of Health, Maputo, Mozambique  
36  
37  
38  
39  
40  
41

42 **Running Title: Prenatal iron prophylaxis and maternal child health**  
43  
44

45 **Corresponding author:**

46 Bright I. Nwaru

47 School of Health Sciences

48 33014 University of Tampere

49 Finland

50 Telephone: +358440127648

51 Fax: +358401901665

52 Email address: bright.nwaru@uta.fi  
53  
54  
55  
56  
57  
58  
59  
60

**ABSTRACT**

**Objective:** To present the pregnancy results and interim birth results of a pragmatic randomized controlled trial comparing routine iron prophylaxis with screening and treatment for anemia during pregnancy in a setting of endemic malaria and HIV.

**Design:** A pragmatic randomized controlled trial

**Setting:** Two health centers (1° de Maio and Machava) in Maputo, Mozambique, a setting of endemic malaria and high prevalence of HIV.

**Participants:** Pregnant women ( $\geq 12$  wk gestation;  $\geq 18$  years old; non-high-risk pregnancy,  $N=4326$ ) attending prenatal care consultation at the two health centers were recruited to the trial

**Interventions:** The women were randomly allocated to either Routine iron ( $n=2184$ ; 60 mg ferrous sulphate plus 400  $\mu\text{g}$  of folic acid daily throughout pregnancy) or Selective iron ( $n=2142$ ; screening and treatment for anemia and daily intake of 1 mg of folic acid).

**Outcome measures:** The primary outcomes were preterm delivery (delivery  $< 37$  weeks of gestation) and low birth weight ( $< 2500$  grams). The secondary outcomes were symptoms suggestive of malaria and self-reported malaria during pregnancy; birth length; cesarean section; maternal and child health status after delivery.

**Results:** The number of follow-up visits was similar in the two groups. Between the first and fifth visits, the two groups were similar regarding the occurrence of fever, headache, cold/chills, nausea/vomiting, and body aches. There was a suggestion of increased incidence of self-reported malaria during pregnancy (odds ratio 1.37, 95% confidence interval 0.98-1.92) in the Routine iron group. Birth data were available for 1109 (51%) in the Routine iron and for 1149 (54%) in the Selective iron groups. The birth outcomes were relatively similar in the two groups. However, there was a suggestion (statistically non-significant) of poorer outcomes in the Routine iron group with regard to long hospital stay after birth (relative risk [RR] 1.43, 95% CI 0.97-1.26; risk difference

[RD] 0.02, 95% CI -0.00-0.03) and unavailability of delivery data (RR 1.06, 95% CI 1.00-1.13; RD 0.03, 95% CI -0.01-0.07).

**Conclusions:** These interim results suggest that routine iron prophylaxis during pregnancy did not confer advantage over screening and treatment for anemia regarding maternal and child health. Complete data on birth outcomes are being collected for firmer conclusions.

**Trial registration:** The trial is registered at ClinicalTrials.gov, number NCT00488579 ([June 2007](#)). [The first women were randomized to the trial proper April 2007- March 2008. The pilot was November 2006-March 2008. The 3-month lag was due to technical difficulties in completing trial registration.](#)

**Funding:** The study was funded by two grants from the Academy of Finland (2004: 210631; 2010: 139191).

**Keywords:** iron, pregnancy, birth, malaria, HIV, pragmatic trial, Mozambique

**ARTICLE SUMMARY:****Article focus:**

- The benefits of iron prophylaxis during pregnancy on maternal and child health in developing country settings with endemic malaria and high prevalence of HIV is unclear.
- Iron has been linked to increased risk of infections.
- Among children less than three years, there are indications of harm of universal iron prophylaxis.

**Key messages:**

- Routine iron prophylaxis during pregnancy did not suggest better maternal and child health outcomes than screening and treatment for anemia in a setting of endemic malaria and HIV.

**Strengths and limitations of this study**

- So far, this represents the largest trial investigating the benefits of prophylactic iron during pregnancy on maternal and child health in malaria-endemic settings.
- The compliance of the study nurses with the trial protocol and that of the women with regards to uptake of the iron and folic acid tablets was good, as was the follow-up during pregnancy.
- The collection of delivery data was challenging, resulting in up to an estimated 40% of missing birth data, which are now been traced with using various methods.

## INTRODUCTION

Despite widespread recommendation of routine iron prophylaxis during pregnancy, its benefits and risks for the mother and child, beyond the reduction of the risk of anemia, remain unclear, particularly in low-income settings. Reviews of randomized controlled trials (RCTs) done for the Cochrane Collaboration and the World Health Organization (WHO) have failed to conclude whether routine iron prophylaxis during pregnancy is beneficial or harmful to pregnancy outcomes.<sup>1,2</sup> There is some evidence that high hemoglobin concentration in late pregnancy may be associated with adverse effects on pregnancy.<sup>3,4</sup> It has also been suggested that iron increases the risk of infections.<sup>5-7</sup> The host requires iron for biochemical functioning, but iron may as well promote the replication of infectious agents.<sup>6</sup> For developing country settings which are still plagued by infectious diseases, such as malaria and HIV, the potential of iron to increase the risk of infections raises serious public health concerns.<sup>8,9</sup>

Previous trials conducted in malarial developing country settings that have evaluated the effects of iron supplementation during pregnancy on maternal and child outcomes have been hampered by small samples, large dropouts, and several outcome-related exclusions.<sup>10-14</sup> The findings from the trials were conflicting on the role of prophylactic iron supplementation on birth weight, prematurity, perinatal mortality, incidence of malaria, and other pregnancy and birth outcomes. Consequently, the evidence they provide is insufficient in addressing the question of the advantages and disadvantages of prenatal prophylactic iron. The results of studies from non-malarial areas<sup>15-21</sup>, although of better quality, may not be relevant due to different settings.<sup>15-21</sup> Although, results were also conflicting in a number of outcomes, the main findings included slightly longer birth length, longer gestational age, and reduced risk of preterm delivery, intrapartum hemorrhage, low birth weight, and infant and child mortality in the iron-folic acid group (Nwaru et al *Submitted*).

1  
2  
3  
4  
5 This limited evidence and the importance of iron prophylaxis in prenatal programs call for further  
6  
7 investigation on the benefits of prenatal iron supplementation in areas of endemic malaria and high  
8  
9 prevalence of HIV. Using a pragmatic randomized controlled trial, we investigated the effects of  
10  
11 routine iron prophylaxis throughout pregnancy compared to screening and treatment for anemia on  
12  
13 maternal and child health in Maputo, Mozambique. The present paper presents the pregnancy  
14  
15 results and interim birth results. About 40% of births were missed by the original data collection  
16  
17 method (Nwaru et al *Submitted*), and missing birth data are currently being retrieved with various  
18  
19 complementary methods. The completed birth results will be presented later.  
20  
21  
22  
23

## 24 25 **MATERIALS AND METHODS**

### 26 27 *Study design and population*

28  
29 The details of the PROFEG trial have been described elsewhere (Nwaru et al *Submitted*) and only  
30  
31 the main features are given here. The trial was a pragmatic randomized controlled trial to compare  
32  
33 two iron administration policies (routine iron prophylaxis versus screening and treatment for anemia  
34  
35 during pregnancy) on maternal and child health in Maputo, Mozambique. The trial was carried out  
36  
37 in two health centers, 1° de Maio in Maputo City (the capital) Machava 2, in Maputo Province, in  
38  
39 [2007-2008; the completion of collection of birth data continued until 2012.](#)  
40  
41  
42  
43  
44

### 45 46 *Recruitment*

47  
48 During the routine early morning health education sessions, all women who came for their first  
49  
50 prenatal visit were given general information about the study. Recruitment into the study occurred  
51  
52 during individual consultations and was carried out by study nurses who were employed and trained  
53  
54 by the project. They carried a recruitment book in which they entered the information of the  
55  
56 recruited women. In 1° de Maio health center, the women visited the study nurses after their routine  
57  
58  
59  
60

1  
2  
3 prenatal care consultations with the maternal and child health (MCH) nurses. In Machava, the study  
4  
5 nurse and the routine MCH nurse saw the women in the same room. The study nurses checked for  
6  
7 women's eligibility to participate in the study. All pregnant women attending their first prenatal  
8  
9 visit were the target group. The exclusion criteria were: woman missed attending a visit with the  
10  
11 study nurses; too early in pregnancy (< 12 weeks); with high obstetric risk; and aged less than 18  
12  
13 years. The nurses asked the women to join the study if they did not meet any of the exclusion  
14  
15 criteria. Oral and written informed consent was obtained.  
16  
17  
18  
19

### 20 21 ***Randomization***

22  
23 The participating women were randomized into either the Routine iron group (i.e., routine iron  
24  
25 prophylaxis from the first to the last prenatal visit) or the Selective iron group group (i.e. regular  
26  
27 screening for hemoglobin level and treatment for anemia). Researchers (OA) used the STATA  
28  
29 statistical software (StataCorp LP, Texas, USA) was used to generate sequential random numbers  
30  
31 separately for the two centers and the women were assigned to either of the groups with a  
32  
33 probability of 50%. The codes for the groups were put into sealed and numbered opaque envelopes;  
34  
35 the number was the woman's study number and was repeated in the documents in the envelope. The  
36  
37 envelope contained a study identification card (yellow for the Routine iron group and pink for the  
38  
39 Selective, 10 x 20cm) and the informed consent form.  
40  
41  
42  
43  
44  
45

### 46 ***Sample size***

47  
48 Because of lack of prior reliable data on the baseline rates of the impact of iron, the sample size was  
49  
50 calculated with various assumptions of the base-line rates, power (85% and 90%), significance level  
51  
52 of 5%, and the size of the difference to be detected (20% and 30%) for pre-term delivery, low birth  
53  
54 weight, clinical malaria, and perinatal mortality. Based on these calculations and the expected  
55  
56  
57  
58  
59  
60



1  
2  
3 feasibility, we decided a target sample size of 2000 women in each of the two groups. The STATA  
4  
5 statistical software was used to estimate the sample size.  
6  
7  
8  
9

### 10 *Interventions*

11  
12  
13 Women in the Routine iron group received 30 tablets (supply of one month) of 60 mg ferrous  
14  
15 sulphate plus 400 µg of folic acid per day. Women in the Selective iron were given 30 tablets of 1  
16  
17 mg of folic acid per day. In the Selective group, at each visit, the nurses measured the hemoglobin  
18  
19 using a rapid hemoglobin measure, HemoCue® Hb 201+, (Hemocue AB, Ängelholm, Sweden). If  
20  
21 their hemoglobin was below the cut-off of <9g/l Hb, they received a monthly double dose of iron  
22  
23 (60 mg + 60 mg) for the treatment of anemia. The tablets were given in a plastic bag having the  
24  
25 drug's name and dose on it.  
26  
27  
28  
29  
30

### 31 *Data collection and follow-up*

32  
33 Data were collected on standard study data forms by three methods: 1) study nurses abstracted data  
34  
35 from mothers' maternity cards, 2) study nurses asked women additional questions at the time of the  
36  
37 prenatal visits, and 3) researchers afterwards collected birth data from hospital birth records.  
38  
39 Delivery nurses were informed of the study and asked to put the delivery cards into a separate study  
40  
41 box. The study women were to be identified by the color of the identification card stapled to their  
42  
43 maternity card. However, this did not succeed very well. By excluding estimated late miscarriages  
44  
45 (5%), early stillbirths (3 %) and home births (10%), we should have received delivery data for 3547  
46  
47 women (82%) of the 4326 women who participated in the trial. We received birth data for only  
48  
49 2258 (64% of the estimated 3547) women.  
50  
51  
52  
53  
54

### 55 *Outcome measures*

1  
2  
3 The primary outcomes were preterm delivery (delivery <37 weeks of gestation and low birth weight  
4 (<2500 grams). Originally, we had malaria activation as a primary outcome, but the pilot showed  
5 that it was not feasible. Secondary outcomes were perinatal mortality (as available from our data  
6 collection forms; unlikely to cover early stillbirths or neonatal births occurring at home);  
7 complications during pregnancy and labor; symptoms suggestive of malaria (fever, headache,  
8 cold/chills, nausea/vomiting, and body aches); and self-reported malaria during pregnancy (the  
9 woman was asked for diagnosed malaria since her last visit).  
10  
11  
12  
13  
14  
15  
16  
17  
18  
19

### 20 21 *Calculation of gestational age at birth*

22 Only 681 (30%) of the women with delivery data had their gestational age recorded at birth. The  
23 gestational age for women without that information was estimated from dates using the following  
24 algorithm: gestational age at first visit in days + days between the first visit and delivery; the days  
25 were then transformed into weeks. For some women (n = 196), the date of delivery was not  
26 available. In these cases, date of discharge from the hospital after delivery (minus the length of stay  
27 at the hospital) (n = 22) or the date of admission to the hospital (n = 60 women who did not have  
28 the date of discharge) was used.  
29  
30  
31  
32  
33  
34  
35  
36  
37  
38  
39

### 40 41 *Adherence*

42 The women were instructed and encouraged at each visit to take the tablets they were given.  
43 Women allocated to the Routine iron group could refuse to take the iron tablets and they were  
44 classified as non-compliant with the intervention. Women who belonged in the Selective iron group  
45 and who wanted iron (even if their hemoglobin level was not below the cut-off level) were given  
46 iron; they were classified as non-compliant with the intervention. The following questions were  
47 asked on each visit: “Was hemoglobin measured?”; “Was iron/folic acid given to the woman?”;  
48 “Number of iron/folic acid tablets given?”; “Did the woman take the tablets during the past week?”  
49  
50  
51  
52  
53  
54  
55  
56  
57  
58  
59  
60

1  
2  
3 At each subsequent visit, almost all of the Selective iron women (98%) were measured for  
4 hemoglobin using the recommended HemoCue® method and the same proportion of women in the  
5 Routine iron group were given iron tablets at each subsequent visit.  
6  
7  
8  
9

### 10 11 *Ethical approval*

12 Ethical approval for the study was obtained from the Mozambique Ministry of Health Ethics  
13 Committee (CNBS [Ref. 84/CNBS/06]). A positive statement was obtained from the National  
14 Research and Development Centre for Welfare and Health (STAKES) (now the National Institute  
15 for Health and Welfare), Helsinki, Finland (Dno 2571/501/2007). The trial is registered at  
16 ClinicalTrials.gov, number NCT00488579.  
17  
18  
19  
20  
21  
22  
23  
24  
25  
26

### 27 *Statistical analysis*

28 All analyses were done on an intention-to-treat basis. Twin pregnancies ( $n = 48$  pairs) were  
29 included in the analysis because their numbers were similar in the two groups and their exclusion  
30 did not alter the results. For pregnancy outcomes, all women ( $n = 4326$ ), and for birth outcomes,  
31 women with birth data ( $n = 2258$ ) were included. Differences in health indicators (fever, headache,  
32 cold/chills, nausea/vomiting, body aches, malaria) between the two iron groups at each subsequent  
33 visit (up to the 5<sup>th</sup> visit) during pregnancy were analyzed by using binomial generalized estimating  
34 equations (GEE) with an exchangeable correlation structure. GEE takes into account the within  
35 person correlation in the setting of repeated measures.  
36  
37  
38  
39  
40  
41  
42  
43  
44  
45  
46  
47  
48

49 Differences in continuously distributed birth outcomes (birth weight, duration of gestation, length of  
50 hospital stay) were analyzed by using the two sample Student's  $t$ -test. Categorical outcomes were  
51 analyzed by using Pearson Chi-square test or Fisher's exact test (in the case of cells with less than 5  
52 cases). To estimate the risk ratios of the effect of iron, the binary birth outcomes (low birth weight  
53  
54  
55  
56  
57  
58  
59  
60

1  
2  
3 [ $< 2500$  g], preterm birth [ $< 37$  weeks], cesarean section delivery, child and maternal ill-health or  
4 death at birth, negative fetal heart beat, delivery in a reference health center, long hospital stay after  
5 birth [ $\geq 2$  days], and unavailability of delivery data) were analyzed by generalized linear models.  
6  
7 The result estimates are presented with 95% confidence intervals (95% CI). Statistical significance  
8 was set at  $P < 0.05$ . STATA 11 statistical software was used for the analyses.  
9  
10  
11  
12

## 13 14 15 16 **RESULTS**

17  
18 Of the 4326 women recruited to the trial, 2184 were randomly allocated to the Routine iron group  
19 and 2142 to the Selective iron group (Figure 1). The total number of prenatal visits varied but the  
20 maximum number of visits was seven. The number of follow-up visits was similar in the two  
21 groups (Figure 1). About 40% of delivery data were missed when using the original data collection  
22 method and the interim birth data were available for 1109 (51%) in the Routine iron group and for  
23 1149 (54% of women) in the Selective.  
24  
25  
26  
27  
28  
29  
30  
31  
32  
33

34 Table 1 compares maternal background characteristics between the groups by the availability of  
35 birth data. The occurrence of symptoms suggestive of malaria (fever, headache, cold/chills,  
36 nausea/vomiting, and body aches) and self-reported malaria during the current pregnancy prior to  
37 the first prenatal visit were similar between the Routine and Selective iron groups. The women in  
38 the two groups with and without birth data were comparable.  
39  
40  
41  
42  
43  
44  
45  
46

47 Between the first and fifth visits, the two groups were similar regarding the occurrence of fever,  
48 headache, cold/chills, nausea/vomiting, and body aches (Table 2). There was a suggestion of  
49 increased incidence of self-reported malaria during pregnancy (odds ratio 1.37, 95% confidence  
50 interval 0.98-1.92) in the Routine iron group (Table 2). Table 2 presents the data for the second and  
51 third follow-up visits, but this was the case also in subsequent visits (data not shown).  
52  
53  
54  
55  
56  
57  
58  
59  
60

1  
2  
3  
4  
5 Tables 3 presents the distribution of birth data by intervention group and Table 4 gives the estimates  
6  
7 of the effect sizes on the birth outcomes. The birth outcomes were similar in the two groups.  
8  
9 However, there was a suggestion (statistically non-significant) that the Routine iron group had  
10  
11 worse outcomes in regard to babies with negative heartbeat at admission, and longer mother's  
12  
13 hospital stay after birth (Table 3). The effect of iron on the primary outcomes was similar in the two  
14  
15 groups. The groups were also relatively similar concerning most other outcomes. However, there  
16  
17 was a suggestion of more babies with negative fetal heartbeat at admission, longer mother's hospital  
18  
19 stay after birth and unavailability of delivery data in the Routine iron group (Table 4). By excluding  
20  
21 births by cesarean section, the estimates for longer mother's hospital stay remained the same (data  
22  
23 not shown).  
24  
25  
26  
27  
28

## 29 **DISCUSSION**

30  
31 The results from this trial indicate that routine iron prophylaxis during pregnancy was not  
32  
33 advantageous over the policy of screening and treatment for anemia with regard to pregnancy and  
34  
35 birth outcomes. If anything, screening and treatment for anemia appeared to be better. Among all  
36  
37 the trial women there was a suggestion of an increased risk of self-reported malaria during  
38  
39 pregnancy seen in the Routine iron group. The interim birth data suggested longer hospital stay after  
40  
41 birth and higher risk of negative fetal heart beat in the Routine iron group. However, all these  
42  
43 differences were statistically non-significant and the complete birth data are needed to conclude any  
44  
45 putative effects of iron on birth outcomes.  
46  
47  
48  
49  
50  
51  
52

53 One of the strengths of our trial is its large sample. So far, this represents the largest trial  
54  
55 investigating the benefits of prophylactic iron during pregnancy on maternal and child health in  
56  
57

1  
2  
3 malaria-endemic settings. The compliance of the study nurses with the trial protocol and that of the  
4  
5 women with regards to uptake of the iron and folic acid tablets was good, as was the follow-up  
6  
7 during pregnancy (Nwaru et al *Submitted*). However, during pregnancy, we lacked objective  
8  
9 measures of malaria; hence, our results may not reflect the putative effect of iron on clinical  
10  
11 malaria. The collection of delivery data was challenging, resulting in up to an estimated 40% of  
12  
13 missing birth data. We did not realize the extent of the problem until most deliveries had occurred.  
14  
15 We are currently tracing the birth data using various methods (abstracting hospital records and  
16  
17 death register data and calling women), with results to be reported separately after finalization.  
18  
19  
20  
21  
22  
23

24  
25 A comparison of our findings with previous studies conducted in malaria endemic areas is  
26  
27 problematic because of key differences: the previous studies have compared iron versus no iron and  
28  
29 our study compares two policies of iron administration: routine prophylaxis versus screening and  
30  
31 treatment. Nevertheless, the studies from Nigeria<sup>11</sup> and The Gambia<sup>12</sup> found no significant effect of  
32  
33 iron prophylaxis on malaria; they had used a more reliable measure of malaria (clinical and  
34  
35 parasitological analysis). A Ugandan study<sup>14</sup> did not observe any effect of iron supplementation on  
36  
37 the incidence of congenital malaria in the offspring. A Bangladeshi study<sup>10</sup> found a difference in  
38  
39 preterm delivery (less in the non-iron group), but no association was seen with other outcomes  
40  
41 examined, similar to the Nigerian study<sup>11</sup>, including abortion, hypertension, eclampsia, postnatal  
42  
43 complications, birth weight, Apgar scores, prematurity, development of diarrhea at 6 weeks, and  
44  
45 perinatal mortality. Other benefits reported with iron prophylaxis include increased mean birth  
46  
47 weight<sup>12,14</sup>, reduced incidence of prematurity<sup>12</sup>, and increased birth length and Apgar score.<sup>13</sup>  
48  
49  
50  
51  
52  
53  
54  
55  
56  
57  
58  
59  
60

1  
2  
3 Although more complete birth data are needed to reach firm conclusions, we can speculate that the  
4 potential for higher incidence of unavailable delivery data in the Routine iron group may indicate  
5 that these women had more adverse outcomes, such as miscarriage and stillbirths, and consequently  
6 did not deliver in the expected health centers. Similarly, the higher likelihood of longer mother's  
7 hospital stay after birth in the Routine iron group may also be indicative of more problems at birth.  
8 Delivery by cesarean section did not explain the longer hospital stay as the estimate remained the  
9 same after excluding the births that occurred by cesarean section.  
10  
11  
12  
13  
14  
15  
16  
17  
18  
19  
20  
21

22 Anemia has been associated with maternal and child health risks<sup>22-24</sup>, and the association between  
23 iron and increased risk of infections<sup>5-7</sup> calls for more definitive evidence on the benefits of iron  
24 prophylaxis during pregnancy in settings with increased infectious diseases where infections remain  
25 a major cause of maternal and child mortality.<sup>8,9</sup> Our trial in Maputo, Mozambique, is an attempt to  
26 investigate whether routine iron prophylaxis during pregnancy is more effective than screening and  
27 treatment for anemia in improving maternal and child health in an area of endemic malaria and  
28 HIV.  
29  
30  
31  
32  
33  
34  
35  
36  
37  
38  
39  
40  
41

## 42 CONCLUSIONS

43  
44 These interim results from this pragmatic randomized controlled trial indicate that routine iron  
45 prophylaxis during pregnancy did not suggest better maternal and child health outcomes than the  
46 policy of screening and treatment for anemia. If anything, screening and treatment for anemia  
47 appeared to be better. The complete birth data are needed for a firm conclusion.  
48  
49  
50  
51  
52  
53  
54  
55  
56  
57  
58  
59  
60

## ACKNOWLEDGMENTS

The study was funded by two grants from the Academy of Finland (2004: 210631; 2010: 139191).

## AUTHORS' CONTRIBUTION

Designed, analyzed, and wrote the paper (BIN, EH, ER, and SP). Designed and responsible for the conception of the PROFEG Trial (EH). Participated in the planning of the PROFEG Trial and made substantial contribution in its execution and participated in interpretation of results and critically reviewing the manuscript (BC, CS, EH, FA, GS, JC, MD, MN, OA, SP). Responsible for data preparation and cleaning (ER, OA).

## COMPETING INTEREST

None declared.

## DATA SHARING

Statistical codes and dataset are available from the corresponding author [bright.nwaru@uta.fi](mailto:bright.nwaru@uta.fi). Informed consent was not obtained for data sharing but the presented data are anonymised and risk of identification is low.



## REFERENCES

1. Peña-Rosas JP, Viteri FE. Effects and safety of preventive oral iron or iron+folic acid supplementation for women during pregnancy. *Cochrane Database of Systematic Reviews* 2009, Issue 4, art. No.: CD004736.
2. Villar J, Meriardi M, Gulmezoglu AM, Abalos E, Carroli G, Kulier R, et al. Nutritional interventions during pregnancy for the prevention or treatment of maternal mortality and preterm delivery: an overview of randomized controlled trials. *J Nutr* 2003; 133:1606-25.
3. Lao TT, Tam KF, Chan LY. Third trimester iron status and pregnancy outcome in non-anaemic women: pregnancy unfavourably affected by maternal iron excess. *Hum Reprod* 2000; 15: 1843-48.
4. Yip R. Significance of an abnormally low or high hemoglobin concentration during pregnancy: special consideration of iron nutrition. *Am J Clin Nutr* 2000 72: 272S-9S.
5. Oppenheimer SJ. Iron and its relation to immunity and infectious disease. *J Nutr* 2001; 131: 616S-35S.
6. Prentice AM. Iron metabolism, malaria, and other infections: what is all the fuss about? *J Nutr* 2008; 138: 2537-41.
7. Gera T, Sachdev HP. Effect of iron supplementation on incidence of infectious illness in children: systematic review. *BMJ* 2002; 325: 1142.
8. Lawn JE, Cousens S, Zupan J, Lancet Neonatal Survival Steering Team. 4 million neonatal deaths: When? Where? Why? *Lancet* 2005; 365: 891-900.
9. Idemyor V. Human Immunodeficiency Virus (HIV) and Malaria Interaction in Sub-Saharan Africa: The Collision of Two Titans. *HIV Clin Trials* 2007; 8: 246-53.

- 1  
2  
3 10. Juncker T, Ameer S, Mmaum A, et al. A trial of iron and folate supplementation during  
4 pregnancy in Bangladesh. Abstract presented at the American Public Health Association,  
5 2001, Atlanta, USA.  
6  
7
- 8  
9  
10 11. Fleming AF, Ghatoura GB, Harrison KA, Briggs ND, Dunn DT. The prevention of anaemia  
11 in pregnancy in primigravidae in the guinea savanna of Nigeria. *Ann Trop Med Parasitol*  
12 1986; 80: 211-33.  
13  
14
- 15  
16 12. Menendez C, Todd J, Alonso PL, Francis N, Lulat S, Ceesay S, et al The effects of iron  
17 supplementation during pregnancy, given by traditional birth attendants, on the prevalence  
18 of anaemia and malaria. *Trans R Soc Trop Med Hyg* 1994; 88: 590-3.  
19  
20
- 21  
22 13. Preziosi P, Prual A, Galan P, Daouda H, Boureima H, Hercberg S. Effect of iron  
23 supplementation on the iron status of pregnant women: consequences for newborns. *Am J*  
24 *Clin Nutr* 1997; 66: 1178-82.  
25  
26
- 27  
28 14. Ndyomugenyi R, Magnussen P. Chloroquine prophylaxis, iron/folic-acid supplementation  
29 or case management of malaria attacks in primigravidae in western Uganda: effects on  
30 congenital malaria and infant haemoglobin concentrations. *Ann Trop Med Parasitol* 2000;  
31 94: 759-70.  
32  
33
- 34  
35 15. Christian P, Khattry SK, Katz J, Pradhan EK, LeClerc SC, Shrestha SR, et al. Effects of  
36 alternative maternal micronutrient supplements on low birth weight in rural Nepal: a double  
37 blind randomized community trial. *BMJ* 2003; 326: 571.  
38  
39
- 40  
41 16. Christian P, West KP, Khattry SK, LeClerc SC, Pradhan EK, Katz J, et al. Effects of  
42 maternal micronutrient supplementation on fetal loss and infant mortality: a cluster-  
43 randomized trial in Nepal. *Am J Clin Nutr* 2003; 78: 1194-1202.  
44  
45
- 46  
47 17. Christian P, Darmstadt GL, Wu L, Khattry SK, LeClerc SC, Katz J, et al The effect of  
48 maternal micronutrient supplementation on early neonatal morbidity in rural Nepal: a  
49 randomized, control, community trial. *Arch Dis Child* 2008; 93: 660-4.  
50  
51  
52  
53  
54  
55  
56  
57  
58  
59  
60

- 1  
2  
3 18. Christian P, Khattry SK, LeClerq SC, Dali SM. Effects of prenatal micronutrient  
4 supplementation on complications of labor and delivery and puerperal morbidity in rural  
5 Nepal. *Int J Gynaecol Obstet* 2009; 106: 3-7.  
6  
7  
8  
9  
10 19. Christian P, Stewart CP, LeClerq SC, Wu L, Katz J, West KP Jr, et al. Antenatal and  
11 postnatal iron supplementation and childhood mortality in rural Nepal: a prospective follow-  
12 up in a randomized, controlled community trial. *Am J Epidemiol* 2009; 170: 1127-36.  
13  
14  
15  
16 20. Christian P, Murray-Kolb LE, Khattry SK, Katz J, Schaefer BA, Cole PM, et al. Prenatal  
17 micronutrient supplementation and intellectual and motor function in early school-aged  
18 children in Nepal. *JAMA* 2010; 304: 2716-23.  
19  
20  
21  
22  
23 21. Zeng L, Dibley MJ, Cheng Y, Dang S, Chang S, Kong L, et al. Impact of micronutrient  
24 supplementation during pregnancy on birth weight, duration of gestation, and perinatal  
25 mortality in rural western China: double blind cluster randomized controlled trial. *BMJ*  
26 2008; 337: a2001.  
27  
28  
29  
30  
31  
32 22. Müngen E. Iron supplementation in pregnancy. *J Perinat. Med* 2003; 31: 420-6.  
33  
34  
35 23. Brabin BJ, Hakimi M, Pelletier D. An analysis of anemia and pregnancy-related maternal  
36 mortality. *J Nutr.* 2001; 131(suppl): 604S-15S.  
37  
38  
39 24. Stoltzfus RJ, Mullanny L, Black RE. Iron deficiency anaemia. In: Ezzati M, Lopez AD,  
40 Rodgers A. et al, eds. Comparative Quantification of Health Risks: Global and Regional  
41 Burden of Disease Attributable to Selected Major Risk Factors. Vol 1. Geneva, Switzerland:  
42 World Health Organization; 2004: 163-209.  
43  
44  
45  
46  
47  
48  
49  
50  
51  
52  
53  
54  
55  
56  
57  
58  
59  
60

Table 1. Characteristics of women at recruitment by availability of delivery data and group allocation, proportions % (numbers)

| Characteristics                  | Delivery data, <i>N</i> = 2258 |                          | No delivery data, <i>N</i> = 2068 |                         |
|----------------------------------|--------------------------------|--------------------------|-----------------------------------|-------------------------|
|                                  | Routine iron<br>(1109)         | Selective iron<br>(1149) | Routine iron<br>(1075)            | Selective iron<br>(993) |
| Maternal age, mean (SD) years    | 24.7 (5.3)                     | 24.6 (5.4)               | 24.6 (5.6)                        | 25.0 (5.6)              |
| Maternal age (categorized)       |                                |                          |                                   |                         |
| < 20 years                       | 16.5 (183)                     | 17.5 (201)               | 19.3 (207)                        | 15.7 (156)              |
| 20-24 years                      | 39.9 (443)                     | 41.1 (472)               | 37.1 (399)                        | 39.0 (387)              |
| 25-29 years                      | 23.3 (258)                     | 23.1 (265)               | 23.4 (252)                        | 23.9 (237)              |
| 30-34 years                      | 13.8 (153)                     | 11.3 (130)               | 13.3 (143)                        | 12.9 (128)              |
| ≥ 35 years                       | 5.6 (62)                       | 6.3 (72)                 | 6.5 (70)                          | 7.4 (74)                |
| Missing                          | 0.9 (10)                       | 0.8 (9)                  | 0.4 (4)                           | 1.1 (11)                |
| Previous abortions               |                                |                          |                                   |                         |
| No                               | 86.8 (963)                     | 87.6 (1007)              | 85.4 (918)                        | 86.0 (854)              |
| Yes                              | 12.8 (142)                     | 12.1 (139)               | 14.5 (156)                        | 13.6 (135)              |
| Missing                          | 0.4 (4)                        | 0.3 (3)                  | 0.1 (1)                           | 0.4 (4)                 |
| Gestational age, mean (SD) weeks | 10.2 (5.8)                     | 10.3 (6.0)               | 10.1 (6.1)                        | 10.5 (6.0)              |
| Gestational age (categorized)    |                                |                          |                                   |                         |
| < 10                             | 26.5 (294)                     | 25.9 (298)               | 28.8 (310)                        | 25.3 (251)              |
| 10-14                            | 31.0 (344)                     | 32.2 (370)               | 30.2 (325)                        | 30.5 (303)              |
| 15-28                            | 31.9 (354)                     | 30.4 (349)               | 28.5 (306)                        | 31.2 (310)              |
| > 28                             | 10.1 (112)                     | 11.3 (130)               | 12.4 (133)                        | 12.6 (125)              |
| No information                   | 0.5 (5)                        | 0.2 (2)                  | 0.1 (1)                           | 0.4 (4)                 |
| Previous stillbirths             |                                |                          |                                   |                         |
|                                  | 92.3 (1024)                    | 91.5 (1052)              | 91.0 (978)                        | 91.6 (910)              |

|                                                                      |             |             |             |            |
|----------------------------------------------------------------------|-------------|-------------|-------------|------------|
| No                                                                   | 7.2 (80)    | 8.2 (94)    | 8.9 (96)    | 7.9 (78)   |
| Yes                                                                  | 0.5 (5)     | 0.3 (3)     | 0.1 (1)     | 0.5 (5)    |
| Missing                                                              |             |             |             |            |
| Previous deliveries                                                  |             |             |             |            |
| None                                                                 | 30.3 (336)  | 29.7 (341)  | 33.8 (363)  | 29.2 (290) |
| One                                                                  | 31.7 (352)  | 31.9 (367)  | 28.5 (306)  | 30.6 (304) |
| Two                                                                  | 17.8 (197)  | 19.2 (221)  | 18.6 (200)  | 17.9 (178) |
| Three or more                                                        | 19.8 (220)  | 18.8(216)   | 19.0 (205)  | 22.0 (218) |
| Missing                                                              | 0.4 (4)     | 0.4 (4)     | 0.1 (1)     | 0.3 (3)    |
| HIV status                                                           |             |             |             |            |
| Negative                                                             | 81.8 (907)  | 81.2 (934)  | 79.0 (849)  | 76.7 (762) |
| Positive                                                             | 18.2 (202)  | 18.8 (215)  | 21.0 (226)  | 23.3 (231) |
| Twin pregnancy                                                       |             |             |             |            |
| No                                                                   | 98.6 (1093) | 98.7 (1134) | 99.2 (1066) | 99.2 (985) |
| Yes                                                                  | 1.4 (16)    | 1.3 (15)    | 0.8 (9)     | 0.8 (8)    |
| <i>Symptoms during current pregnancy before first prenatal visit</i> |             |             |             |            |
| Fever                                                                |             |             |             |            |
| Yes                                                                  | 24.4 (271)  | 22.9 (264)  | 23.8 (256)  | 28.8 (286) |
| Headache                                                             |             |             |             |            |
| Yes                                                                  | 43.5 (482)  | 41.5 (477)  | 43.0 (462)  | 44.3 (440) |
| Cold/chills                                                          |             |             |             |            |
| Yes                                                                  | 18.4 (204)  | 18.0 (207)  | 18.8 (202)  | 20.6 (205) |
| Nausea/vomiting                                                      |             |             |             |            |
| Yes                                                                  | 26.9 (298)  | 27.5 (316)  | 28.6 (307)  | 29.8 (296) |

1  
2  
3  
4  
5  
6  
7  
8  
9  
10  
11  
12  
13  
14  
15  
16  
17  
18  
19  
20  
21  
22  
23  
24  
25  
26  
27  
28  
29  
30  
31  
32  
33  
34  
35  
36  
37  
38  
39  
40  
41  
42  
43  
44  
45  
46  
47  
48  
49  
50  
51  
52  
53  
54  
55  
56  
57  
58  
59  
60

|                       |            |            |            |            |
|-----------------------|------------|------------|------------|------------|
| Body aches            |            |            |            |            |
| Yes                   | 21.3 (237) | 21.8 (251) | 23.3 (251) | 23.8 (236) |
| Self-reported malaria |            |            |            |            |
| Yes                   | 6.0 (67)   | 5.7 (66)   | 6.3 (68)   | 5.9 (59)   |
| Had malaria test      |            |            |            |            |
| Yes                   | 7.1 (79)   | 7.0 (80)   | 7.9 (85)   | 8.0 (79)   |

---

For peer review only

Table 2. Proportions (%) of women (numbers) with outcomes suggesting malaria during pregnancy, and odds ratios (OR) and 95% confidence intervals (95% CI) for group effect,  $n = 4326$

| Outcomes              | Second visit <sup>1</sup>       |                                   | Third visit <sup>2</sup>        |                                   | Between the first and fifth visit <sup>3</sup> |                  |                 |
|-----------------------|---------------------------------|-----------------------------------|---------------------------------|-----------------------------------|------------------------------------------------|------------------|-----------------|
|                       | % ( <i>n</i> )                  |                                   | % ( <i>n</i> )                  |                                   | OR (95% CI)                                    |                  |                 |
|                       | Routine iron<br><i>n</i> = 1494 | Selective iron<br><i>n</i> = 1455 | Routine iron<br><i>n</i> = 1106 | Selective iron<br><i>n</i> = 1040 | Selective iron                                 | Routine iron     | <i>P</i> -value |
| Fever                 | 10.0 (150)                      | 11.5 (168)                        | 12.1 (134)                      | 11.3 (117)                        | 1.00                                           | 0.95 (0.81-1.11) | 0.523           |
| Headache              | 24.3 (363)                      | 24.9 (363)                        | 25.1 (278)                      | 24.9 (259)                        | 1.00                                           | 0.98 (0.87-1.10) | 0.738           |
| Cold/chills           | 7.0 (104)                       | 8.2 (120)                         | 7.8 (86)                        | 6.7 (70)                          | 1.00                                           | 0.92 (0.76-1.11) | 0.361           |
| Nausea/vomiting       | 10.2 (153)                      | 9.1 (133)                         | 9.6 (109)                       | 8.5 (88)                          | 1.00                                           | 1.09 (0.92-1.31) | 0.323           |
| Body aches            | 9.2 (138)                       | 10.1 (147)                        | 9.8 (108)                       | 10.9 (113)                        | 1.00                                           | 0.89 (0.75-1.06) | 0.180           |
| Self-reported malaria | 3.0 (45)                        | 2.4 (35)                          | 2.2 (24)                        | 1.5 (16)                          | 1.00                                           | 1.37 (0.98-1.92) | 0.068           |

<sup>1</sup>Between first and second visit

<sup>2</sup>Between second and third visit

<sup>3</sup>The effect estimates calculated by binomial generalized estimating equations (with exchangeable correlation structure) to account for the repeated measures of the outcomes.

Table 3. Birth outcomes by group allocation, percentages, % (numbers) of women or babies or means (SD).

| Outcomes                                     | Routine iron<br><i>n</i> = 1109 | Selective iron<br><i>n</i> = 1149 | <i>P</i> -value <sup>1</sup> |
|----------------------------------------------|---------------------------------|-----------------------------------|------------------------------|
| Birth weight, mean (SD) grams                | 2989.4 (514.9)                  | 2996.3 (508.4)                    | 0.752                        |
| Birth weight, % ( <i>n</i> )                 |                                 |                                   | 0.443                        |
| < 2500 g                                     | 12.8 (142)                      | 11.8 (136)                        |                              |
| 2500-2999 g                                  | 31.1 (345)                      | 30.6 (351)                        |                              |
| 3000-3499 g                                  | 37.8 (419)                      | 40.5 (465)                        |                              |
| 3500-3999 g                                  | 13.8 (153)                      | 12.7 (146)                        |                              |
| ≥ 4000 g                                     | 2.1 (23)                        | 3.0 (34)                          |                              |
| No information                               | 2.4 (27)                        | 1.5 (17)                          |                              |
| Duration of gestation, mean (SD) weeks       | 38.4 (4.0)                      | 38.3 (4.2)                        | 0.689                        |
| Duration of gestation, % ( <i>n</i> )        |                                 |                                   | 0.056                        |
| < 37 weeks                                   | 27.0 (299)                      | 28.8 (331)                        |                              |
| ≥ 37 weeks                                   | 66.9 (742)                      | 67.2 (772)                        |                              |
| No information                               | 6.1 (68)                        | 4.0 (46)                          |                              |
| Mode of delivery, % ( <i>n</i> )             |                                 |                                   | 0.235                        |
| Normal                                       | 89.4 (991)                      | 87.6 (1007)                       |                              |
| Cesarean section                             | 2.0 (22)                        | 1.3 (15)                          |                              |
| No information                               | 8.7 (96)                        | 11.1 (127)                        |                              |
| Child health status at birth, % ( <i>n</i> ) |                                 |                                   | 0.685                        |
| Well                                         | 92.1 (1022)                     | 94.0 (1080)                       |                              |
| Ill                                          | 1.0 (11)                        | 0.7 (8)                           |                              |
| Dead                                         | 2.0 (22)                        | 1.8 (21)                          |                              |
| No information                               | 5.0 (55)                        | 3.5 (40)                          |                              |



|                                                     |             |             |       |
|-----------------------------------------------------|-------------|-------------|-------|
| Still birth, % ( <i>n</i> )                         |             |             | 0.558 |
| No                                                  | 79.7 (884)  | 81.2 (933)  |       |
| Yes                                                 | 2.9 (32)    | 2.5 (29)    |       |
| No information                                      | 17.4 (193)  | 16.3 (187)  |       |
| Fetal heart beat at admission, % ( <i>n</i> )       |             |             | 0.085 |
| Negative                                            | 2.6 (29)    | 1.6 (18)    |       |
| Positive                                            | 85.2 (945)  | 85.6 (984)  |       |
| No information                                      | 12.2 (135)  | 12.8 (147)  |       |
| Mother's health status at birth, % ( <i>n</i> )     |             |             | 0.895 |
| Well                                                | 94.9 (1052) | 95.6 (1098) |       |
| Ill                                                 | 0.4 (4)     | 0.4 (4)     |       |
| Dead                                                | 0.2 (2)     | 0.1 (1)     |       |
| No information                                      | 4.6 (51)    | 4.0 (46)    |       |
| Length of hospital stay, mean (SD) days             | 1.63 (1.30) | 1.33 (1.21) | 0.075 |
| Length of hospital stay after birth, % ( <i>n</i> ) |             |             | 0.103 |
| ≤ 1 day                                             | 60.7 (673)  | 65.1 (748)  |       |
| 2 days                                              | 24.2 (268)  | 23.5 (270)  |       |
| ≥ 3 days                                            | 5.6 (62)    | 4.0 (46)    |       |
| No information                                      | 9.6 (106)   | 7.4 (85)    |       |
| Place of delivery, % ( <i>n</i> )                   |             |             | 0.652 |
| 1o de Maio (health center)                          | 42.6 (472)  | 44.4 (510)  |       |
| Machava (health center)                             | 38.2 (424)  | 35.1 (403)  |       |
| Jose Macamo (hospital)                              | 3.6 (40)    | 3.7 (43)    |       |
| Mavalane (hospital)                                 | 12.8 (142)  | 14.3 (164)  |       |

1  
2  
3  
4  
5  
6  
7  
8  
9  
10  
11  
12  
13  
14  
15  
16  
17  
18  
19  
20  
21  
22  
23  
24  
25  
26  
27  
28  
29  
30  
31  
32  
33  
34  
35  
36  
37  
38  
39  
40  
41  
42  
43  
44  
45  
46  
47  
48  
49  
50  
51  
52  
53  
54  
55  
56  
57  
58  
59  
60

|                        |          |          |
|------------------------|----------|----------|
| Central Hospital       | 0.3 (3)  | 0.3 (3)  |
| At home                | 1.3 (14) | 1.1 (13) |
| On the way to hospital | 0.2 (2)  | 0.0 (0)  |
| No information         | 1.1 (12) | 1.1 (13) |

---

<sup>1</sup>Based on T-test for continuous outcomes, Pearson Chi-square test or Fisher’s exact test for categorical outcomes. Subjects with no information were not included in the tests.

For peer review only

Table 4. Numbers and proportions (%) by iron groups, and relative ratio (RR) and risk difference (RD) and their 95% confidence intervals (95% CI) of the effect of routine iron on birth outcomes

| Outcomes                                     | Routine iron<br><i>n</i> | Selective iron<br><i>n</i> | Routine iron<br>% | Selective iron<br>% | Effects of routine iron |                    |
|----------------------------------------------|--------------------------|----------------------------|-------------------|---------------------|-------------------------|--------------------|
|                                              |                          |                            |                   |                     | RR (95% CI)             | RD (95% CI)        |
| <i>Primary health outcomes</i>               |                          |                            |                   |                     |                         |                    |
| Low birth weight (<2500 grams)               | 142                      | 136                        | 12.8              | 11.8                | 1.09 (0.88-1.36)        | 0.01 (-0.02-0.04)  |
| <i>P</i> -value                              |                          |                            |                   |                     | 0.431                   | 0.469              |
| Preterm delivery (<37 weeks)                 | 299                      | 331                        | 27.0              | 28.8                | 0.96 (0.84-1.09)        | -0.02 (-0.05-0.02) |
| <i>P</i> -value                              |                          |                            |                   |                     | 0.185                   | 0.340              |
| <i>Secondary health outcomes</i>             |                          |                            |                   |                     |                         |                    |
| Cesarean section delivery                    | 22                       | 15                         | 2.0               | 1.3                 | 1.48 (0.77-2.84)        | 0.01 (-0.00-0.02)  |
| <i>P</i> -value                              |                          |                            |                   |                     | 0.238                   | 0.191              |
| Negative fetal heart beat at admission       | 29                       | 18                         | 2.6               | 1.6                 | 1.66 (0.93-2.96)        | 0.01 (-0.00-0.02)  |
| <i>P</i> -value                              |                          |                            |                   |                     | 0.089                   | 0.097              |
| Child ill or dead at birth                   | 33                       | 29                         | 3.0               | 2.5                 | 1.20 (0.73-1.96)        | 0.01 (-0.01-0.02)  |
| <i>P</i> -value                              |                          |                            |                   |                     | 0.473                   | 0.467              |
| Mother ill or dead at birth                  | 6                        | 5                          | 0.5               | 0.4                 | 1.25 (0.38-4.09)        | 0.00 (-0.00-0.01)  |
| <i>P</i> -value                              |                          |                            |                   |                     | 0.711                   | 0.722              |
| <i>Other outcomes</i>                        |                          |                            |                   |                     |                         |                    |
| Delivery in reference center <sup>1</sup>    | 185                      | 210                        | 16.7              | 18.3                | 0.91 (0.76-1.09)        | -0.02 (-0.05-0.02) |
| <i>P</i> -value                              |                          |                            |                   |                     | 0.316                   | 0.317              |
| Long hospital stay after delivery (≥ 3 days) | 62                       | 46                         | 5.6               | 4.0                 | 1.43 (0.97-1.26)        | 0.02 (-0.00-0.03)  |
| <i>P</i> -value                              |                          |                            |                   |                     | 0.059                   | 0.075              |
| No delivery data                             | 1075                     | 993                        | 49.2              | 46.4                | 1.06 (1.00-1.13)        | 0.03 (-0.01-0.07)  |
| <i>P</i> -value                              |                          |                            |                   |                     | 0.060                   | 0.183              |

<sup>1</sup>Jose Macamo or Mavalane or Central Hospital

1  
2  
3  
4  
5  
6  
7  
8  
9  
10  
11  
12  
13  
14  
15  
16  
17  
18  
19  
20  
21  
22  
23  
24  
25  
26  
27  
28  
29  
30  
31  
32  
33  
34  
35  
36  
37  
38  
39  
40  
41  
42  
43  
44  
45  
46  
47  
48  
49

For peer review only

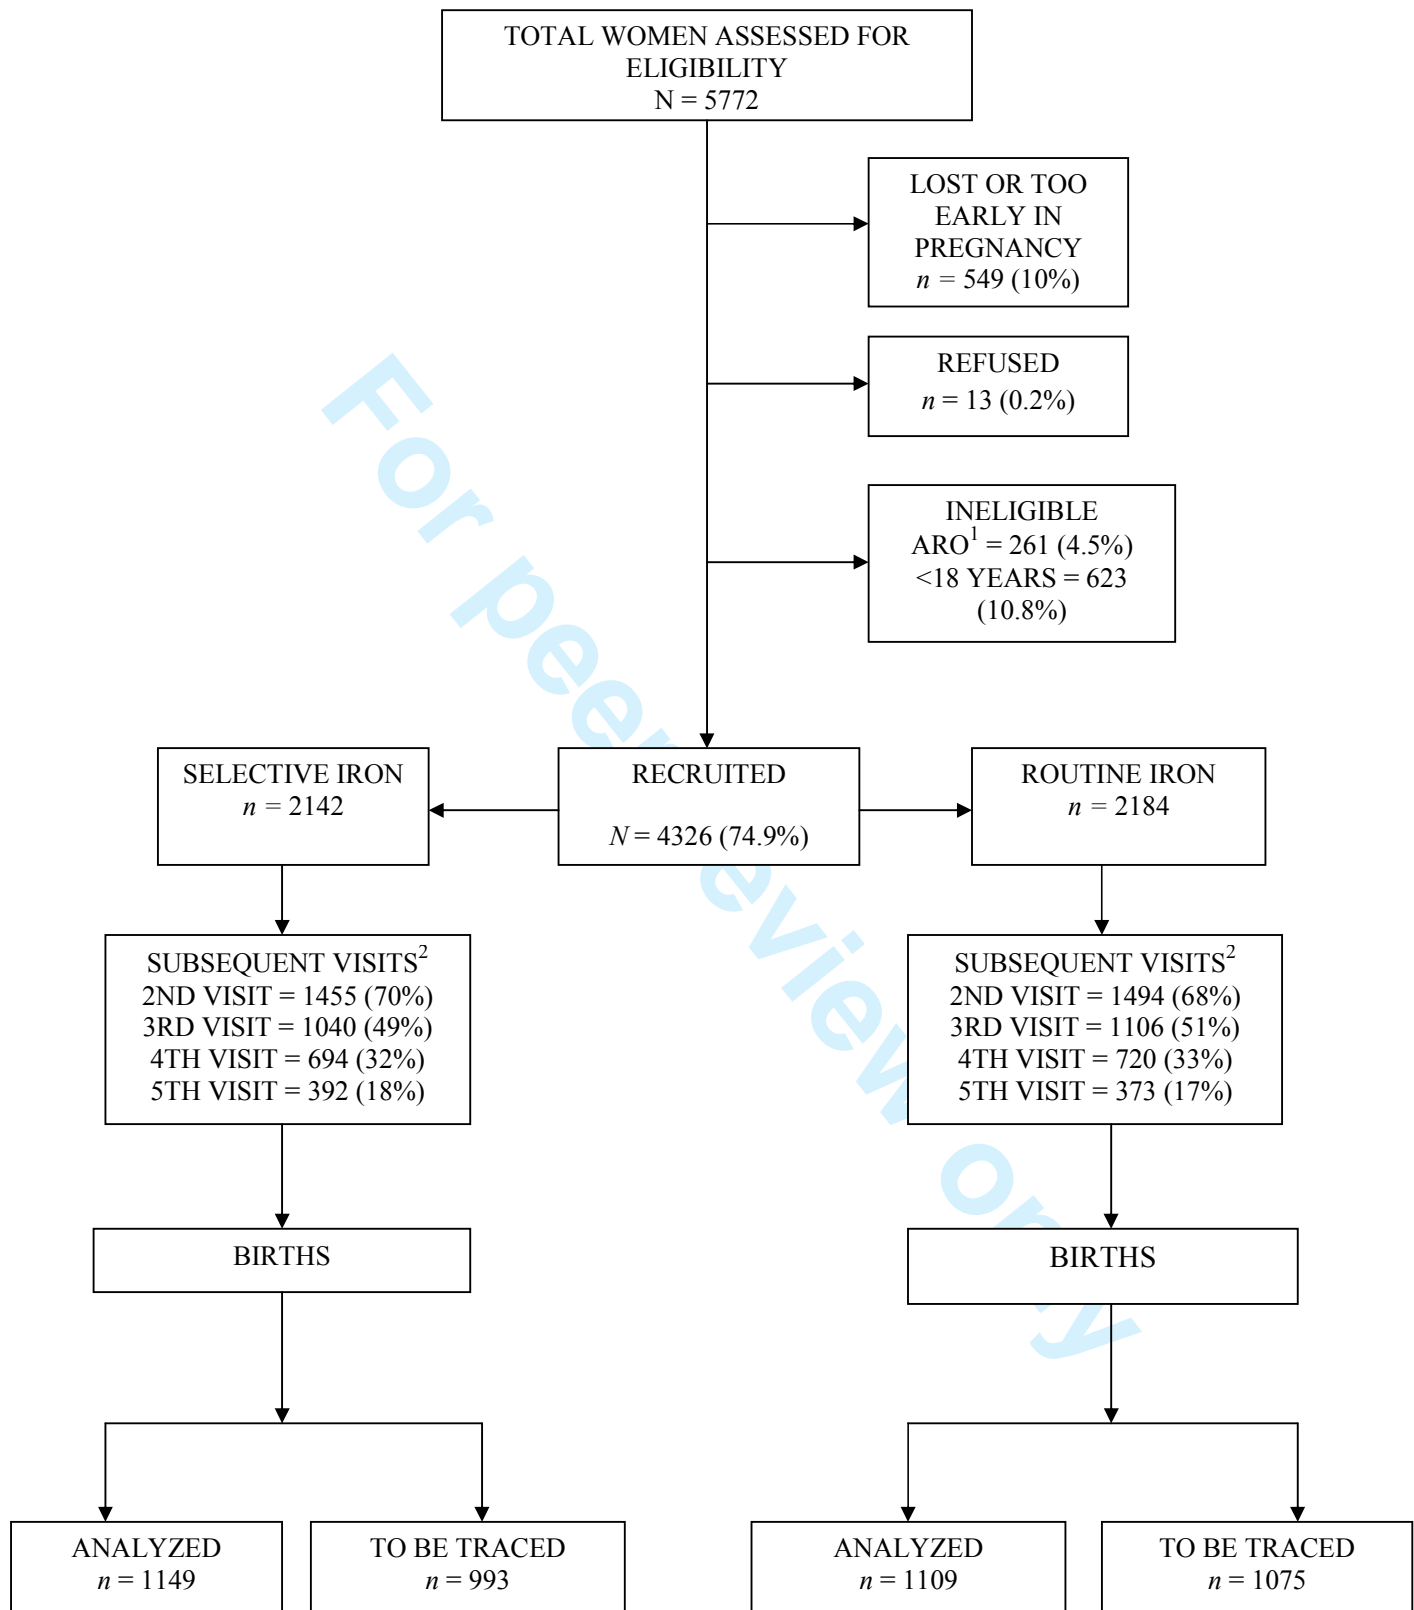

**Figure 1.** PROFEG Trial Flow Diagram

<sup>1</sup>ARO = high risk pregnancy; <sup>2</sup>After recruitment, % were calculated from recruited,  $n = 4326$

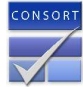

## CONSORT 2010 checklist of information to include when reporting a randomised trial\*

| Section/Topic                    | Item No | Checklist item                                                                                                                                                                              | Reported on page No |
|----------------------------------|---------|---------------------------------------------------------------------------------------------------------------------------------------------------------------------------------------------|---------------------|
| <b>Title and abstract</b>        |         |                                                                                                                                                                                             |                     |
|                                  | 1a      | Identification as a randomised trial in the title                                                                                                                                           | 1                   |
|                                  | 1b      | Structured summary of trial design, methods, results, and conclusions (for specific guidance see CONSORT for abstracts)                                                                     | 2, 3                |
| <b>Introduction</b>              |         |                                                                                                                                                                                             |                     |
| Background and objectives        | 2a      | Scientific background and explanation of rationale                                                                                                                                          | 5,6                 |
|                                  | 2b      | Specific objectives or hypotheses                                                                                                                                                           | 6                   |
| <b>Methods</b>                   |         |                                                                                                                                                                                             |                     |
| Trial design                     | 3a      | Description of trial design (such as parallel, factorial) including allocation ratio                                                                                                        | 7                   |
|                                  | 3b      | Important changes to methods after trial commencement (such as eligibility criteria), with reasons                                                                                          | None                |
| Participants                     | 4a      | Eligibility criteria for participants                                                                                                                                                       | 7                   |
|                                  | 4b      | Settings and locations where the data were collected                                                                                                                                        | 6                   |
| Interventions                    | 5       | The interventions for each group with sufficient details to allow replication, including how and when they were actually administered                                                       | 8                   |
| Outcomes                         | 6a      | Completely defined pre-specified primary and secondary outcome measures, including how and when they were assessed                                                                          | 9                   |
|                                  | 6b      | Any changes to trial outcomes after the trial commenced, with reasons                                                                                                                       | None                |
| Sample size                      | 7a      | How sample size was determined                                                                                                                                                              | 7,8                 |
|                                  | 7b      | When applicable, explanation of any interim analyses and stopping guidelines                                                                                                                | NA                  |
| <b>Randomisation:</b>            |         |                                                                                                                                                                                             |                     |
| Sequence generation              | 8a      | Method used to generate the random allocation sequence                                                                                                                                      | 7                   |
|                                  | 8b      | Type of randomisation; details of any restriction (such as blocking and block size)                                                                                                         | 7                   |
| Allocation concealment mechanism | 9       | Mechanism used to implement the random allocation sequence (such as sequentially numbered containers), describing any steps taken to conceal the sequence until interventions were assigned | 7                   |
| Implementation                   | 10      | Who generated the random allocation sequence, who enrolled participants, and who assigned participants to interventions                                                                     | 6,7                 |
| Blinding                         | 11a     | If done, who was blinded after assignment to interventions (for example, participants, care providers, those                                                                                | Not done.           |

|                                                      |     |                                                                                                                                                   |                                           |
|------------------------------------------------------|-----|---------------------------------------------------------------------------------------------------------------------------------------------------|-------------------------------------------|
|                                                      |     | assessing outcomes) and how                                                                                                                       | Pragmatic trial design                    |
|                                                      |     |                                                                                                                                                   | NA                                        |
| Statistical methods                                  | 11b | If relevant, description of the similarity of interventions                                                                                       | 10,11                                     |
|                                                      | 12a | Statistical methods used to compare groups for primary and secondary outcomes                                                                     | Not done                                  |
|                                                      | 12b | Methods for additional analyses, such as subgroup analyses and adjusted analyses                                                                  |                                           |
| <b>Results</b>                                       |     |                                                                                                                                                   |                                           |
| Participant flow (a diagram is strongly recommended) | 13a | For each group, the numbers of participants who were randomly assigned, received intended treatment, and were analysed for the primary outcome    | 11, Figure 1                              |
|                                                      | 13b | For each group, losses and exclusions after randomisation, together with reasons                                                                  | 11, Figure 1                              |
| Recruitment                                          | 14a | Dates defining the periods of recruitment and follow-up                                                                                           | 6                                         |
|                                                      | 14b | Why the trial ended or was stopped                                                                                                                | Ended as planned                          |
| Baseline data                                        | 15  | A table showing baseline demographic and clinical characteristics for each group                                                                  | Table 1                                   |
| Numbers analysed                                     | 16  | For each group, number of participants (denominator) included in each analysis and whether the analysis was by original assigned groups           | 11, Tables 2-4                            |
| Outcomes and estimation                              | 17a | For each primary and secondary outcome, results for each group, and the estimated effect size and its precision (such as 95% confidence interval) | 11,12, Tables 2-4                         |
|                                                      | 17b | For binary outcomes, presentation of both absolute and relative effect sizes is recommended                                                       | Table 4                                   |
| Ancillary analyses                                   | 18  | Results of any other analyses performed, including subgroup analyses and adjusted analyses, distinguishing pre-specified from exploratory         | None                                      |
| Harms                                                | 19  | All important harms or unintended effects in each group (for specific guidance see CONSORT for harms)                                             | NA (benefits and harms not distinguished) |
| <b>Discussion</b>                                    |     |                                                                                                                                                   |                                           |
| Limitations                                          | 20  | Trial limitations, addressing sources of potential bias, imprecision, and, if relevant, multiplicity of analyses                                  | 13                                        |
| Generalisability                                     | 21  | Generalisability (external validity, applicability) of the trial findings                                                                         | 13, 14                                    |
| Interpretation                                       | 22  | Interpretation consistent with results, balancing benefits and harms, and considering other relevant evidence                                     | 13, 14                                    |
| <b>Other information</b>                             |     |                                                                                                                                                   |                                           |
| Registration                                         | 23  | Registration number and name of trial registry                                                                                                    | 3                                         |
| Protocol                                             | 24  | Where the full trial protocol can be accessed, if available                                                                                       | From Authors                              |
| Funding                                              | 25  | Sources of funding and other support (such as supply of drugs), role of funders                                                                   | 3, 15.                                    |

1  
2  
3  
4  
5  
6  
7  
8  
9  
10  
11  
12  
13  
14  
15  
16  
17  
18  
19  
20  
21  
22  
23  
24  
25  
26  
27  
28  
29  
30  
31  
32  
33  
34  
35  
36  
37  
38  
39  
40  
41  
42  
43  
44  
45  
46  
47  
48  
49

\*We strongly recommend reading this statement in conjunction with the CONSORT 2010 Explanation and Elaboration for important clarifications on all the items. If relevant, we also recommend reading CONSORT extensions for cluster randomised trials, non-inferiority and equivalence trials, non-pharmacological treatments, herbal interventions, and pragmatic trials. Additional extensions are forthcoming: for those and for up to date references relevant to this checklist, see [www.consort-statement.org](http://www.consort-statement.org).

For peer review only



## Original Article

# A pragmatic randomised controlled trial on routine iron prophylaxis during pregnancy in Maputo, Mozambique (PROFEG): rationale, design, and success

Bright I. Nwaru\*, Saara Parkkali†, Fatima Abacassamo‡, Graca Salomé§, Baltazar Chilundo‡, Orvalho Augusto‡, Julie Cliff‡, Martinho Dgedge¶, Elena Regushevskaya†, Minna Nikula† and Elina Hemminki†

\*School of Health Sciences, University of Tampere, Tampere, Finland, and †Health Services and Policy Research, National Institute for Health and Welfare, Helsinki, Finland, and ‡Department of Community Health, Eduardo Mondlane University, Maputo, Mozambique, and §Department of Biochemistry, Biology, Genetics and Molecular Biology, Eduardo Mondlane University, Maputo, Mozambique, and ¶Ministry of Health, Maputo, Mozambique

## Abstract

The effects of prophylactic iron during pregnancy on maternal and child health in developing settings with endemic malaria and high prevalence of HIV remain unclear. This paper describes the rationale, implementation and success of a pragmatic randomised controlled trial comparing routine iron supplementation vs. screening and treatment for anaemia during pregnancy. The setting was two health centres in Maputo, Mozambique. Pregnant women ( $\geq 12$ -week gestation;  $\geq 18$  years old; and not with a high-risk pregnancy,  $n = 4326$ ) were recruited. The main outcomes are preterm delivery and low birthweight. The women were randomly assigned to one of two iron administration policies: a routine iron group ( $n = 2184$ ) received 60 mg of ferrous sulphate plus 400  $\mu\text{g}$  of folic acid daily while a selective iron group ( $n = 2142$ ) had screening and treatment for anaemia and a daily intake of 1 mg of folic acid. The recruitment, follow-up, and collection of follow-up data were successful; both groups were similar to each other in all the trial stages. Collection of delivery data was challenging and data on about 40% of births is missing. These are currently being traced through different hospitals and health centres. The compliance of the study personnel and the women with regard to regular measurement of haemoglobin and intake of the iron and folic acid tablets was high and similar in both trial arms. Taking into account the various constraints encountered, the stages of the present trial prior to delivery were carried out well.

**Keywords:** iron, clinical trials, micronutrients, pregnancy, pregnancy outcomes, birth outcomes, developing countries, malaria, infections, HIV.

Correspondence: Mr Bright I. Nwaru, School of Health Sciences, University of Tampere, 33014 Tampere, Finland. E-mail: bright.nwaru@uta.fi

Trial Registration: The trial is registered at ClinicalTrials.gov, number NCT00488579 (June 19, 2007). The first women were randomised to the trial in November 2006.

## Introduction

Iron deficiency remains a major public health concern in most developing countries, particularly among pregnant women and children (Stoltzfus 2001; McLean *et al.* 2009). Iron-deficiency anaemia in pregnancy is associated with maternal and child health risks (Brabin *et al.* 2001; Stoltzfus *et al.* 2004). On the other hand, high haemoglobin concentrations in late pregnancy also correlate with adverse effects on pregnancy (Lao *et al.* 2000; Yip 2000). Because of poor

intake and low bioavailability of iron from many foods, iron supplementation has been widely recommended during pregnancy (Müngen 2003; Peña-Rosas & Viteri 2009). Studies show that prophylactic iron supplementation reduces the risk of anaemia (Yip 2000). But beyond the reduction of anaemia risk, the effects of routine iron prophylaxis on maternal and child health in developing settings remain unclear. Cochrane reviews and the World Health Organization (WHO) overviews of randomised controlled trials (RCTs) and a study in Finland compar-

ing routine and selective iron prophylaxis (based on haemoglobin level) have failed to conclude whether routine iron prophylaxis during pregnancy is beneficial or harmful (Hemminki & Rimpelä 1991; Yip 2000; Villar *et al.* 2003).

The potential of iron to advance infections raises serious concerns for developing settings (Oppenheimer 2001; Gera & Sachdev 2002; Prentice 2008). Infectious agents need iron for replication (Prentice 2008). In sub-Saharan African countries, a large proportion of maternal and child mortality is attributed to infections during pregnancy (Lawn *et al.* 2005; Idemyor 2007), malaria and HIV being the main health risks (Idemyor 2007). Malaria may modify the effects of iron therapy, as some evidence suggests differences in the metabolism of iron between malarial and non-malarial subjects (Gera & Sachdev 2002; Prentice 2008). Some studies show that malaria may be less prevalent and milder among pregnant iron-deficient women (Kabyemela *et al.* 2008). A review by Oppenheimer (2001) showed that five out of nine controlled trials among non-pregnant subjects in malarial areas indicated that iron supplementation increased the rates of clinical episodes of malaria and increased morbidity from other infections. A Tanzanian trial (Sazawal *et al.* 2006) among young children in an endemic malaria area found that those who received iron plus folic acid were more likely to die or be treated in a hospital than those who received placebo. That study recommended treatment of children after screening rather than routine supplementation. On the contrary, a Cochrane review on iron supplementation for preventing or treating anaemia among children in malaria-endemic areas concluded that iron does not increase the risk of

clinical malaria when regular screening and treatment of malaria are provided (Ojukwu *et al.* 2009). We found no trial on the effect of iron on HIV infection, but some studies suggest a harmful effect of iron on the progression of HIV infections (Boelaert *et al.* 1996; Gordeuk *et al.* 2001).

The effects of iron on health outcomes in populations with concomitant endemic malaria, iron-deficiency anaemia and on the prevalence of HIV are unexplored (Adetifa & Okomo 2009). There is an urgent need for trials to assess the effects on maternal and child health of prophylactic iron supplementation during pregnancy in populations where iron-deficiency anaemia, endemic malaria and HIV are prevalent (Adetifa & Okomo 2009).

The aim of this paper was threefold: (1) to give the rationale for a pragmatic randomised trial (PROFEG) comparing the effects of two policies on iron administration during pregnancy (routine prophylactic iron supplementation vs. screening and treatment for anaemia) on maternal and newborn health in Maputo, Mozambique, a setting of endemic malaria and high prevalence of HIV; (2) to describe the study design; and (3) to describe the implementation and compliance.

### Previous trials on iron supplementation during pregnancy

A PubMed search of trials on the effects of iron supplementation during pregnancy and on birth outcomes in developing countries was carried out up to March 2011. Using a combination of key search terms (iron, iron + folic acid, micronutrients, pregnancy,

#### Key messages

- Beyond the reduction of the risk of anaemia, the effects of routine iron prophylaxis on maternal and child health in developing settings remain unclear.
- The effects of iron on health outcomes in populations with concomitant endemic malaria, iron-deficiency anaemia and high prevalence of HIV are unexplored.
- We used a pragmatic randomised trial to compare the effects of two policies of iron administration during pregnancy (routine prophylactic iron supplementation vs. screening and treatment for anaemia) on maternal and newborn health in Maputo, Mozambique, a setting of endemic malaria and high prevalence of HIV.
- Taking into account the various constraints encountered, the planned trial proved feasible in an ordinary health care setting in Maputo.

pregnancy outcomes, birth outcomes, developing countries, malaria, infections, HIV), we extracted all relevant RCTs, quasi-RCTs and other controlled clinical trials. The bibliographies of eligible papers were scrutinised to identify additional potential studies. The appendix shows the flow of the literature search process.

We only included studies that had iron or iron plus folic acid only or in combination with other micronutrients as the intervention and a placebo or alternative that has no iron in it as the control. Some studies examined the effects of micronutrient supplementation during pregnancy on pregnancy and birth outcomes in low-income countries (Fall *et al.* 2009). We excluded these studies if iron was both in the intervention and the control groups.

The titles and abstracts of identified studies were checked, and the full text of all potentially eligible studies (except for one unpublished study that had only an extended conference abstract [Juncker *et al.* American Public Health Association (APHA), Atlanta, 2001]) was assessed. Table 1 presents the features and results from the trials included in this summary. The eligible studies were categorised according to the WHO classification (<http://www.malaria.org/ABOUT%20MALARIA/Vaccination%20requirement%20and%20malaria%20situation%20WHO.pdf>) into malarial and non-malarial areas. The Bangladeshi trial [APHA, Atlanta, 2001 (T. Juncker *et al.*, unpublished observations)] was carried out in rural Dhaka, and we classified it into the malarial areas, considering that most parts of the country have malaria, although the city of Dhaka is classified as a non-malarial area (WHO International Travel and Health 2011). We contacted (E-mail correspondence) the authors of that study, but they were unsure of the malaria situation of the trial setting at the time of the study.

Five trials were carried out in malaria-endemic areas. A small trial from Nigeria by Fleming *et al.* (1986) investigated the effects of anti-malarial, iron and folic acid prophylaxis on maternal and child health, including malaria, among primigravid women in comparison with a control group. No significant effects of iron were seen on any of the outcomes investigated. However, because of poor compliance,

large number of dropouts, several exclusions by outcomes, particularly severe anaemia, no viable conclusions can be made from that study. The study by Menendez *et al.* (1994) among multigravid poor pregnant women from rural Gambia found a beneficial effect of iron on birthweight {56-g [95% confidence interval (CI) 12–128] increase} and prematurity. However, outcome-related exclusions (27%), such as preterm delivery and anaemia, were problematic. In a rather small trial from Niger (after recruitment at a mean pregnancy of 28 weeks), iron had a beneficial effect on birth length [0.7-cm (95% CI 0.05–1.35) increase] and Apgar score [0.4 (95% CI 0.16–0.96) increase], but not on birthweight (Preziosi *et al.* 1997). However, the small number of women undermines the reliability of the results.

A trial from Uganda found a beneficial effect of iron on birthweight with a 82-g (95% CI 81–83) increase (2999 vs. 2917 g for the iron and placebo arms of the trial, respectively) Ndyomugenyi & Magnussen 2000). Because of a large number of dropouts and many outcome-related exclusions – inclusion of women who developed anaemia or caught malaria, and late weighing of the baby – the study falls short in addressing our research question. The trial from rural Dhaka, Bangladesh enrolled pregnant women at 24 weeks of pregnancy [APHA, Atlanta, 2001 (T. Juncker *et al.*, unpublished observations)]. The study showed no effect of iron-folate on low birthweight, maternal hypertension, antepartum haemorrhage, maternal infection, stillbirth or neonatal death. However, in the iron-folate group, preterm birth [odds ratio (OR), 1.43, 95% CI 1.08–1.89] was more common and birthweight was reduced by 57 g. The results of that study were only available as an extended abstract, so it is difficult to judge the reliability of its findings.

In non-malarial areas, we found two trials that investigated the effect of prenatal iron prophylaxis on maternal and child health (Christian *et al.* 2003a,b, 2008, 2009a,b, 2010; Zeng *et al.* 2008). A trial from rural western China (Zeng *et al.* 2008) showed a 2-day longer gestational age, reduced risk of early preterm delivery (OR 0.50, 95% CI 0.27–0.94), and slightly longer birth length [0.3 cm (95% CI 0.09–0.51)] in the iron-folate group compared with the folate-only group. No difference was seen in the mean

**Table 1.** Previous trials investigating health outcomes of prophylactic iron supplementation during pregnancy, endemic malaria areas and non-malarial areas, developing countries

| Author, year of publication (Reference number)                                          | Country    | Allocation  | Intervention* (n)***                 | Control† (n)***                                     | N‡   | Start                       | Population                                          | Results§¶                               | Potential problems                                                                                                   |
|-----------------------------------------------------------------------------------------|------------|-------------|--------------------------------------|-----------------------------------------------------|------|-----------------------------|-----------------------------------------------------|-----------------------------------------|----------------------------------------------------------------------------------------------------------------------|
| Malarial area                                                                           |            |             |                                      |                                                     |      |                             |                                                     |                                         |                                                                                                                      |
| Fleming <i>et al.</i> 1986**                                                            | Nigeria    | RCT         | 60 mg iron; 60 mg + 1 mg folate (40) | Placebo; 600 mg chloroquine + 100 mg proguanil (42) | 200  | <24 weeks                   | 1 <sup>st</sup> pregnancy                           | No significant effect of iron found.    | Compliance was poor; high dropout rates, and exclusions by outcomes                                                  |
| Menendez <i>et al.</i> 1994††                                                           | The Gambia | RCT         | 60 mg iron + 1 mg folate (273)       | Placebo + 1 mg folate (277)                         | 757  | <34th week                  | More than 1 pregnancy                               | ▲BW                                     | Outcome-related exclusions 27% (e.g. preterm births, women developing anaemia)                                       |
| Preziosi <i>et al.</i> 1997††                                                           | Niger      | RCT         | 100 mg iron (99)                     | Placebo (98)                                        | 197  | Mean 28 week (SD 3 weeks)   | Healthy women, 66% anemic                           | ▲BL; ▲AS                                | Small trial                                                                                                          |
| Ndyomugenyi & Magnussen 2000§§                                                          | Uganda     | RCT         | 120 mg iron + 5 mg folate (174)      | Placebo (168)                                       | 576  | <28 week                    | 1 <sup>st</sup> pregnancy, Hb ≥80 g L <sup>-1</sup> | ▲BW                                     | Outcome-related exclusions (women developing anaemia, late baby weighing); many lost to follow-up                    |
| APHA, Atlanta, 2001 (T. Juncker <i>et al.</i> , unpublished observations) <sup>¶¶</sup> | Bangladesh | Alternative | 66 mg Iron + 250 µg folate (772)     | Vitamin B (812)                                     | 2007 | ≥24 week                    | ≥9.0 g/dL Hb at recruitment                         | ▲PD; ▼BW                                | Only extended abstract available                                                                                     |
| Non-malarial area                                                                       |            |             |                                      |                                                     |      |                             |                                                     |                                         |                                                                                                                      |
| Zeng <i>et al.</i> 2008***                                                              | China      | Cluster RCT | 60 mg iron + 400 µg folate (1565)    | 400 µg folate (1705)                                | 3929 | <28 week                    | Early pregnancy <28 weeks                           | ▲GA; ▼PD; ▼MA; ▲BL                      | Outcome-related exclusions 20–26% (withdrawal due to nausea and vomiting, foetal loss, and other medical conditions) |
| Christian <i>et al.</i> 2003a,b, 2008, 2009a,b, 2010†††                                 | Nepal      | Cluster RCT | 60 mg iron + 400 µg folate (635)     | Vitamin A, 1000 µg (628)                            | 2008 | Mean 11 week (SD 5.1 weeks) | Recent pregnancy                                    | ▼IH; ▼PS; ▼LBW; ▼IM; ▼CM; ▲BW; ▲IF; ▲MF | >90% of births happened at home; large numbers of dropouts for most outcomes and reduced number at follow-ups        |

A, abortion; AH, antepartum haemorrhage; ALRI, acute lower respiratory infections; AS, Apgar score; B, bacteriuria; BA, birth asphyxia; BW, birthweight; BL, birth length; CC, chest circumference; CM, child mortality; D, diarrhoea; DL, dysfunctional labour; E, pre-eclampsia; FL, foetal loss; GA, gestational age; HC, head circumference; IF, intellectual functioning; IH, intrapartum haemorrhage; IM, 3-month infant mortality; LBW, low birthweight; M, malaria; MD, mode of delivery; MF, motor functioning; MH, maternal hypertension; MI, maternal infection; ND, neonatal death; O, ophthalmia; P, pyrexia; PD, preterm delivery; PH, post-partum haemorrhage; PS, puerperal sepsis; PVT, positive venereal disease research laboratory test; PW, placenta weight; RM, preterm premature rupture of membrane; SA, skin abscess; SB, stillbirth; SGA, small-for-gestational age; SS, skin sepsis; UCN, umbilical cord around the neck. \*If several intervention groups, only the iron or iron-folate group is presented. †The control group is a placebo or control alternative that excludes iron. ‡Total number of subjects randomised in both iron and control groups. §Comparing the intervention group with the control group. Only results that achieved statistical significance (as reported by the authors) are presented. ¶Symbols: (▲) increase; (▼) decrease. \*\*Outcome assessed: A, ALRI, AS, B, BA, BW, CM, D, E, FL, GA, IH, MD, MH, ND, P, PH, PVT, SA and UCN. ††Outcome assessed: BW, LBW and M. †††Outcome assessed: AS, BW, BL and PW. §§Outcome assessed: BW, †††Outcome assessed: AH, BW, LBW, MH, MI, ND, PD and SB. \*\*\*Outcome assessed: BW, BL, GA, HC, LBW, PD and SGA. ††††Outcome assessed: ALRI, BA, BL, BW, CC, CM, DL, FL, H, HC, IF, IH, IM, LBW, MF, PD, PS, RM and SGA. †††††Number analysed.

1  
2  
3  
4  
5  
6  
7  
8  
9  
10  
11  
12  
13  
14  
15  
16  
17  
18  
19  
20  
21  
22  
23  
24  
25  
26  
27  
28  
29  
30  
31  
32  
33  
34  
35  
36  
37  
38  
39  
40  
41  
42  
43  
44  
45  
46  
47  
48  
49  
50  
51  
52  
53  
54  
55  
56  
57  
58  
59  
60

birthweight and head circumference or proportion of low birthweight and small-for-gestational age children. A trial from a rural Nepalese district (Christian *et al.* 2003a,b, 2008, 2009a,b, 2010) followed women from a mean of 11 gestational weeks up to 7 years of follow-up and found among the iron-supplemented group a reduced risk for: intrapartum haemorrhage [risk ratio (RR) 0.59, 95% CI 0.35–0.98]; puerperal sepsis (sepsis 1, measured as  $\geq 100.4^{\circ}\text{F}$  on  $\geq 2$  of the first 10 days, with an RR of 0.72, 95% CI 0.54–0.95; or sepsis 2 measured as  $\geq 100.4^{\circ}\text{F}$  on 2 or more of the first 10 days plus foul-smelling vaginal discharge for  $\geq 2$  days, with an RR of 0.57, 95% CI 0.35–0.91); low birthweight (RR 0.84, 95% CI 0.72–0.99); 3-month infant mortality (RR 0.53, 95% CI 0.30–0.92); child mortality from birth up to the age of 7 years (RR 0.69, 95% CI 0.49–0.99). Among children whose mothers were supplemented with iron during pregnancy, the trial found an increase in birthweight (37 g, 95% CI –16–90) and better intellectual and motor functioning. Iron supplementation did not influence a number of other outcomes (dysfunctional labour, eclampsia, preterm premature rupture of membrane, birth length, small-for-gestational age, head and chest circumferences, foetal loss, preterm birth, birth asphyxia, acute lower respiratory infections, and hypertension).

In sum, the review of the findings of studies from malarial settings does not allow for a definite conclusion of the benefits of prophylactic iron supplementation on the health of the mother and child. While all of these trials compared iron with either a placebo or a viable control group, no data were available comparing the effects of routine iron supplementation vs. screening and treatment for anaemia. For malaria-prone settings, the suggestion that iron may invigorate the occurrence of infections brings into question the universally routine use of iron prophylaxis (Sazawal *et al.* 2006; Ojukwu *et al.* 2009). None of the previous trials took into account the malaria or HIV status of its participants. Consequently, a clear window of opportunity still exists to further investigate the advantages and disadvantages of routine iron supplementation during pregnancy in settings with concomitant prevalence of malaria and HIV by comparing routine administration of iron to all women vs. administration of iron to only those found to be anaemic.

## Methods

### Objectives and hypotheses of the PROFEG Trial

The specific objectives of the trial were: (1) to evaluate whether routine iron prophylaxis from the first prenatal visit until delivery (called ‘routine iron’ subsequently) is better than screening and treatment for anaemia (called ‘selective iron’) in regard to maternal and child health, such as preterm delivery, low birthweight and perinatal mortality; (2) to assess whether there is a difference in the effects of iron between high and low seasons of malaria; and (3) to assess whether screening and iron treatment for anaemia is more feasible than routine iron prophylaxis in terms of the use of health care providers and overall compliance in Maputo, Mozambique. Originally, we had had malaria activation as one of the primary outcomes, but the pilot showed it to be unfeasible because the needed equipments were not available in the nurses’ office; thus, we collected information on symptoms suggestive of malaria (fever, headache, cold, vomiting/nausea, and body aches during pregnancy).

In line with these objectives, we formulated four working hypotheses: (1) preterm delivery, low birthweight and perinatal mortality are more common among women who receive routine iron prophylaxis; (2) (modified after the pilot) routine iron prophylaxis during pregnancy increases symptoms suggestive of malaria; (3) the health problems in hypotheses 1 and 2 are more prominent in the season of high malaria; and (4) screening and treatment for anaemia is equally feasible than routine iron prophylaxis in terms of use of health care providers and overall compliance.

### Study context

The study was carried out in the health centre (clinic settings) of 1° de Maio in Maputo City (the capital) (March 2007–December 2008) and in the health centre of Machava 2 in Maputo Province (June 2007–March 2008), Mozambique; Machava is adjacent to Maputo City. The study centres are urban health centres and were chosen on the basis of the following criteria: they did prenatal care and had maternity

ward for child delivery; the two main general hospitals were referral hospitals; the number of births was sufficient to complete the study in the planned time; they had a good accessibility to facilitate the supervision of the study; the centres had an ongoing prevention of vertical transmission of the HIV programme; care providers were interested in the programme; and data collection was feasible. The health profile of Mozambique is typical of sub-Saharan African countries, with nearly 55% of its 23 million people living below the poverty line (The World Bank 2011). The main causes of morbidity and mortality are infectious and parasitic diseases, with malaria accounting for 30–40% mortality. At the time of the trial, the prevalence of HIV/AIDS was estimated to be around 16% nationally, and around 20% in Maputo City (Measure Demographic and Health Surveys 2009). Health care is administered by the state through district, provincial and national systems (Lindlöw *et al.* 2004).

Prenatal consultations are recommended from the third month of pregnancy and are usually carried out, along with delivery, by mother-and-child health (MCH) nurses. Women who come for their first prenatal consultation with a pregnancy of less than 3 months are not seen and are asked to return when the pregnancy becomes visible. Women with problems prior to the third month are referred to a hospital. Seventy-five per cent of women in Maputo City have four or more prenatal consultations, with 50% starting their first prenatal visits by the fourth or fifth month (Lindlöw *et al.* 2004). Like in all public health centres in Mozambique, prenatal care and delivery were free of charge.

Care recommendations at the time of the study included: daily prophylactic iron-folate supplementation (60 mg + 400 µg) throughout pregnancy, one dose of mebendazol 500 mg (for intestinal parasite), malaria prophylaxis with sulfadoxine pyrimethamine, as well as haemoglobin measurement and syphilis screening at the first prenatal visit. Three doses of tetanus vaccine were recommended: at the fifth and seventh months and at delivery. Malaria was diagnosed during prenatal consultations through a laboratory test and by clinical signs. Voluntary HIV testing was offered in many health centres, including our study centres (Mozambican Ministry of Health 2002).

Usually, women arrived at the health centre around 6 am–7 am, with the prenatal consultation ending around 1 pm. At the prenatal sessions, women collectively received information and counselling regarding HIV, vaccinations, and advice on diet. After the collective information session, women were individually attended to by MCH nurses, during which time they had a (voluntary) HIV test and tetanus vaccination. After the individual consultation, the women were sent to the health centre laboratory to have blood tests for syphilis, haemoglobin, and (primiparous women) blood group determination. Haemoglobin was routinely measured only during the first prenatal consultation, but if a woman presented clinical signs of anaemia, she could have further laboratory tests.

Mothers were given a prenatal card on their first visit and were requested to bring it on subsequent visits. The card was to be completed at each prenatal visit and to be given to the birthplace (called hospitals subsequently). After delivery, in some health centres/hospitals the prenatal card was given back to the woman, while for some it was retained in the hospital archives. The prenatal card also had a section covering births, but not all hospitals completed it. Health centres had no individual records for pregnant women; they had a book of first visits including woman's names, age and date of visit. In addition, only the numbers of subsequent visits were recorded, and these were not linked to individual women.

Data on births were collected using separate forms, which were kept by the hospitals. Furthermore, hospitals had other records (admission books, birth books, books for complications, etc) that varied from one hospital to another. Hospital archiving was variable and unreliable. Often, documents were put into a box and retained in a room containing other things too. Post-natal visits were not customary, and no form was used in those visits. The main reason for attending the health centre after delivery was for contraception.

### Recruitment

In the two study health centres, general information about the study was given to all women attending their first prenatal visit during the routine early morning health-education sessions. Recruitment

1  
2  
3  
4  
5  
6  
7  
8  
9  
10  
11  
12  
13  
14  
15  
16  
17  
18  
19  
20  
21  
22  
23  
24  
25  
26  
27  
28  
29  
30  
31  
32  
33  
34  
35  
36  
37  
38  
39  
40  
41  
42  
43  
44  
45  
46  
47  
48  
49  
50  
51  
52  
53  
54  
55  
56  
57  
58  
59  
60

occurred during the individual consultations. The physical locations of the two study centres were slightly different: in the 1° de Maio health centre, a room separate from the prenatal visit room was used, while in the Machava centre, it was the same room. In both centres, the women first went for the voluntary HIV testing; the nurses estimated that about 99% of the women had the HIV test.

In the 1° de Maio health centre, the women first had their routine prenatal care consultation with the MCH nurse, followed by the visit to the study nurse. The study nurse checked for eligibility, and those who met the inclusion criteria were asked if they wanted to join the study. In Machava, it was the MCH nurse who asked if the woman wanted to join the trial. If she agreed, the study nurse sat jointly with the MCH nurse when the information on the woman's history was collected and completed the data collection form simultaneously while the routine nurse completed the routine prenatal form. After the consultation, women in the selective iron group had their haemoglobin measured using HemoCue® (Hemocue AB, Ångelholm, Sweden). Women were then supposed to be guided to the laboratory to have the routine tests.

Study nurses were given a study recruitment book into which they entered the following information on the recruited women: name, age, and number of previous pregnancies and births. The study nurses were retired nurses employed by the project. They were given training and a study manual, which they used to carry out the different steps of the study. In the Machava health centre, the MCH nurses collected the data on subsequent visits. The MCH nurses were paid a little incentive (\$10.00 to \$25.00 per month, depending on the number of women present at each visit) by the project for accommodating the study and for guiding the study nurses. Recruitment and randomisation into the study took place from November 21, 2006 to March 31, 2008.

### Exclusion criteria

All pregnant women having their first prenatal visit were the target group. Women excluded from the study were those who missed attending to the study

nurses; those too early in pregnancy (<12 weeks), women with high obstetric risk and those less than 18 years of age.

### Interventions

Women in the Routine iron group (i.e. routine iron prophylaxis from the first to the last prenatal visit) received 30 tablets (supply of one month) of 60 mg of ferrous sulphate plus 400 µg of folic acid per day. Women in the Selective iron group (i.e. regular screening for haemoglobin level and treatment for anaemia) were given 30 tablets of 1 mg of folic acid per day. At each visit the nurses measured the haemoglobin using a rapid haemoglobin measure (HemoCue Hb 201+). If their haemoglobin was below the cut-off of <9 g/dL Hb, they received a double dose of iron (60 + 60 mg for treatment of anaemia). The iron plus folic acid tablets were round and red in colour, while the folic acid only tablets were round and yellow in colour. The tablets were given in a plastic bag that had the drug's name and dose on it.

### Outcome measures

The main outcomes were preterm delivery (delivery <37 weeks of gestation, estimated from last menstrual period) and low birthweight (<2500 g). Originally, malaria activation was one of the primary outcomes, but as the pilot showed it to be unfeasible, we dropped it. Instead, we collected information on symptoms suggestive of malaria (fever, headache, cold, vomiting/nausea and body aches during pregnancy as secondary outcomes) and self-reported malaria during pregnancy (the woman was asked by the study nurse whether she has had diagnosed malaria since her last visit). Secondary outcomes were perinatal mortality (as available from the local registers; unlikely to cover early stillbirths or neonatal births occurring at home), complications during pregnancy and labour, and symptoms suggestive of malaria.

### Sample size

As there was no prior reliable information on baseline rates or what impact iron might have, we calcu-

lated the sample size with various assumptions of the baseline rates, power (85 and 90%), significance level of 5%, and the size of the difference to be detected (20 and 30%) for preterm delivery, low birth rate, (clinical malaria) and perinatal mortality. Based on these calculations and the expected feasibility, the target size chosen was 2000 women for each group. The STATA 7 (StataCorp LP, College Station, TX, USA) was used to estimate the sample size.

### Randomisation

Women who agreed to participate and met the inclusion criteria were randomised into either Routine iron group or Selective iron group. The STATA statistical software was used to generate sequential random numbers separately for the two centres, and the women were assigned to either of the groups with a probability of 50%.

The codes for the groups were put into sealed and sequentially numbered opaque envelopes; the woman's study number was repeated on all the documents in the envelope. The envelope contained a study identification card (pink for the Selective group and yellow for the Routine iron group, 10 × 20 cm) and an informed consent form. The envelopes were put into a box and the study nurses were advised to pick them in order. Before the nurse opened the envelope, she wrote the woman's name on it. After opening, the coloured study identification card was stapled to the maternity card.

Informed consent was requested in two stages: first orally, and again after opening the envelope, this time with written confirmation. An envelope was opened for each woman who had orally agreed to join the trial. Women were asked to sign or thumb-print the informed consent form. Nurses read and explained the text of the form to those who could not read Portuguese. Women were informed about the study on an individual basis. Detailed information was given about the group the woman was assigned to, while it was also explained that the woman had the right not to follow the recommendations. The information included data collection procedures, such as longer first visit and meeting the study nurse at each visit.

Those who refused to participate were assured that their decision would not influence their routine care.

### Data collection and follow-up

Data were collected through three methods: (1) abstracting data from mothers' maternity cards and birth records around the time of the visit/hospital stay; (2) asking women questions at prenatal visits; and (3) for birth data only, collecting data from hospital records, death registers, as well as calling women to complete missing data. The first two methods were used mainly for data collection during pregnancy, while the last method (involving mixed methods) was used for collection of delivery data. The first two mentioned methods are described here.

In the 1° de Maio health centre and at the first visit at the Machava health centre, data from prenatal visits were collected by the trained study nurses using data collection forms. In subsequent visits to the Machava health centre, data were collected by the MCH nurses who were giving routine care. Study women were identified by the colour study identification card stapled to the maternity card. Clinical data were abstracted from the maternity cards. Additional questions were asked, for example, on whether the woman had had malaria since the previous visit, whether any malaria prophylaxis was taken, and whether the iron and folic acid tablets were taken by the women. Researchers regularly collected these forms from the health centres; coding and data entry were done by research assistants at the Eduardo Mondlane University using Microsoft Access. The data were later transferred to STATA for data analysis.

The study nurses were given diaries to record any incidents at the health centres, any lack of iron tablets, lack of HIV tests (reagents) or any information they felt was valuable. The information from these diaries was regularly checked by the study coordinators.

At delivery, the study women were identified by the colour identification card stapled to their maternity card. Nurses taking care of deliveries at the study health centres were informed of the study and were requested to tear the study identification card from the maternity card, staple it to the (routine) delivery



card, and put the delivery card into a separate study box. The study nurses abstracted data from the delivery cards onto the data collection forms daily. At the two second-level referral hospitals (Mavalane and Jose Macamo), the MCH nurses were informed of the study and asked likewise to put the delivery cards aside. The study coordinators collected the data from these referral hospitals every 1–2 weeks. We could not organise the birth data collection at the central hospital (third-level hospital) or other potential birthplaces.

### Compliance

The women were instructed and encouraged at each visit to take the tablets they were given. Women allocated to the Routine iron group could refuse to take the iron tablets, in which case they were classified as non-compliant with the intervention. Women who belonged to the Selective iron group and wanted iron (even if their haemoglobin level was not below the cut-off level) were given iron and were classified as non-compliant with the intervention. To assess whether nurses had given the tablets and that women had taken the tablets, a few questions were asked on each subsequent visit, including ‘Was haemoglobin measured?’, ‘Was iron/folic acid given to the woman?’, ‘Number of iron/folic acids given?’, and ‘Did the woman take the tablets during the past week?’

### Ethical approval

Ethical approval for the study was obtained from the Mozambique Ministry of Health Ethics Committee [CNBS (Ref. 84/CNBS/06)]. A positive statement was obtained from the National Institute for Health and Welfare, Helsinki, Finland (Dno 2571/501/2007).

### Monitoring

The study was monitored for reliable data collection and the safety of the intervention. Decreased haemoglobin levels in the screening group were reported to the local ethics committee. The study nurses kept diaries on ‘any events’, the stock of iron tablets in the

health centre, any lack of HIV tests and reagents. They kept a register on the women’s attendance to subsequent visits and kept a separate stock of iron tablets purchased for the study; the stock was to be used in the event that the health centre ran out of iron tablets; they reported to the local coordinators. Local coordinators and international coordinators visited the study sites regularly and verified that the study procedures were followed in regard to informing the women, randomisation, recruitment, the technique for measuring haemoglobin using HemoCue, handing out of iron/folic acid tablets and the data collection. Study nurses reported to the local coordinators and local coordinators reported to the international coordinators.

### Pilot

A pilot study to study the feasibility of recruitment and follow-up during pregnancy was carried out between November 2006 and March 2007 in the 1° de Maio health centre to test the feasibility of recruitment (Parkkali *et al.* 2008). A total of 781 women were enrolled into the pilot study, 134 of whom were followed until delivery; the pilot did not test the completeness of birth data collection.

The setting up of the pilot study was time consuming and administrative issues and authorisations took longer than expected. However, after practical obstacles had been solved, the study design turned out to be feasible. The mean number of women recruited per week was 43. The women came from various nearby areas. Anaemia prevalence (Hb < 9 g/dL) in the selective iron group at recruitment was 36% ( $n = 140$ ) according to HemoCue. By the standard measurement (Lovibond®; The Tintometer Limited, UK) it was 0.5%. Of the 134 deliveries, 78% ( $n = 104$ ) took place in the health centre, 17% ( $n = 23$ ) in the referral hospital (Mavalane) and 5% ( $n = 7$ ) at home. Home deliveries were recorded in the maternity delivery register at the health centre when the women came with their newborn to have vaccinations and to receive the baby card.

The changes made to the trial protocol included a slight modification to the data collection forms and dropping the aim of collecting data on malaria

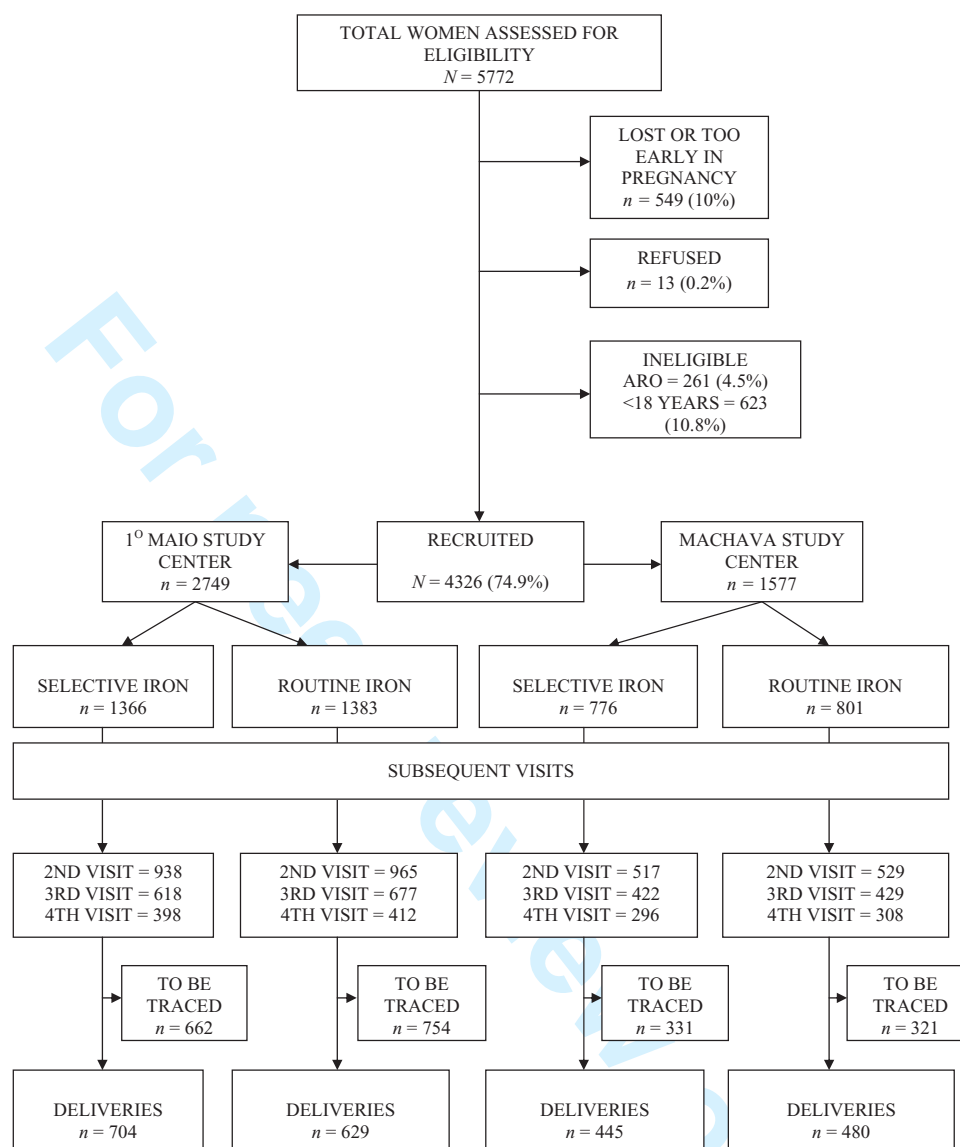

Fig. 1. PROFEG Trial flow diagram.

activation, which had proved unfeasible. The main procedures were not modified.

### Statistical analysis

The data were analysed by basically computing descriptive results (means and proportions) of the differences between the iron groups.

## Results

### Recruitment and exclusions

Figure 1 presents the flow of women in the study. Of the 5778 women present at recruitment (3942 in the 1° de Maio health centre and 1836 in the Machava health centre), the final sample size was 4326 (75%) women, randomised into the two study groups (2184

to the Routine iron and 2142 to the Selective iron group).

Excluded women were: women not attending the study nurse at all (usually did not find their way) and those who were too early in pregnancy (<12 weeks) ( $n = 549$ ), refusals ( $n = 13$ ), those with high-risk pregnancy ( $n = 261$ ), and those less than 18 years of age ( $n = 623$ ). We aimed to collect background information on women who refused, but this did not happen systematically.

### Randomisation

Women in both study groups were similar to each other as well as in the two study centres, indicating a successful randomisation (Table 2). Thirty-three per cent of the women in the Selective iron group had low haemoglobin at enrolment, and were given iron as planned (Table 2).

### Follow-up visits and deliveries

The number of visits varied, but was similar in the two groups (Table 3). Most women had only two subsequent visits. The maximum number of visits was seven (about 0.3% of women). For simplicity, the number of subsequent visits were grouped from 1 to 5+ (Table 3).

Table 4 shows the timing of the subsequent visits. At each subsequent visit, most women were between 24 and 36 weeks gestation, and this was similar in both study groups. Consequently, it is possible that most of the women might have delivered before the next visit (Table 4); however, the reasons for absence in subsequent visits and whether the women had delivered or not were not adequately ascertained.

Thus far, we have not obtained information on all deliveries; currently, we are in the process of locating further delivery data by various methods. Even by excluding estimated late miscarriages (5%), early stillbirths (3%) and estimated home births (10%), we would have expected to obtain data for 3547 women (82%) of the 4326 women who participated in the trial. In the event, we obtained data on only 2258 (64% of 3547) women. We were alerted to these problems too late to be able make adjustments. As deliv-

ery cards for our study women were found in all four assumed delivery places, we did not realise the numbers were fewer than expected until the time at which most deliveries would have been expected to have occurred.

### Compliance

The compliance of the study nurses is illustrated in Table 5: assessing how many of the women coming for subsequent visits had had their haemoglobin measured and were given iron and folic acid tablets. At each subsequent visit, almost all of the Selective iron women were measured for haemoglobin using the recommended HemoCue method. Almost all women in the Routine iron group were given iron tablets at each subsequent visit. About one-third of the Selective iron women received iron tablets because of low haemoglobin, while the other two-thirds received folic acid only (Table 5). HemoCue was also used to measure women in the Routine iron group at the beginning of the trial. Although it was planned not to test the women in this group again in the trial, a misunderstanding meant it was sometimes used later, although for a small number of women.

Table 6 shows compliance with taking iron and folic acid tablets during the week previous to each visit based on self-report. Most women reported taking the tablets regularly as advised and this was similar in the Selective and Routine iron groups in both study centres.

### Discussion

This paper described the rationale, design, and success of a pragmatic RCT on iron prophylaxis during pregnancy in Maputo, Mozambique. Recruitment and randomisation in the study were done well. Follow-up visits during the study were similar in both trial arms. However, collecting delivery data posed a challenge, and an estimated 36% of institutionalised births were missed. The missed births are now being traced by matching the women to admissions data in the study health centres and referral hospitals. The compliance of the study personnel (with regards to measurement of women's haemoglobin) and the women to the

**Table 2.** Characteristics of women at recruitment, by group and centre

| Characteristic                                      | All             |               | 1° de Maio study centre |               | Machava study centre |               |
|-----------------------------------------------------|-----------------|---------------|-------------------------|---------------|----------------------|---------------|
|                                                     | n = 4326        |               | n = 2749                |               | n = 1577             |               |
|                                                     | Selective iron* | Routine iron† | Selective iron*         | Routine iron† | Selective iron*      | Routine iron† |
|                                                     | n = 2142        | n = 2184      | n = 1366                | n = 1383      | n = 776              | n = 801       |
| Maternal age (years), mean (SD)‡                    | 24.8 (5.5)      | 24.7 (5.5)    | 24.5 (5.5)              | 24.2 (5.4)    | 25.2 (5.4)           | 25.4 (5.5)    |
| Maternal age, n (%)                                 |                 |               |                         |               |                      |               |
| < 20                                                | 357 (17)        | 390 (18)      | 247 (18)                | 270 (20)      | 110 (14)             | 120 (15)      |
| 20–24                                               | 859 (40)        | 842 (39)      | 566 (41)                | 559 (40)      | 293 (38)             | 283 (35)      |
| 25–29                                               | 502 (23)        | 510 (23)      | 297 (22)                | 301 (22)      | 205 (26)             | 209 (26)      |
| 30–34                                               | 257 (12)        | 296 (13)      | 145 (11)                | 167 (12)      | 112 (14)             | 129 (16)      |
| ≥35                                                 | 146 (7)         | 132 (6)       | 98 (7)                  | 73 (5)        | 48 (7)               | 59 (8)        |
| Missing                                             | 21 (1)          | 14 (1)        | 13 (1)                  | 13 (1)        | 8 (1)                | 1 (0)         |
| Gestational age (weeks), mean (SD)‡                 | 10.4 (6.0)      | 10.2 (5.9)    | 9.9 (5.8)               | 9.6 (5.6)     | 11.2 (6.1)           | 11.2 (6.4)    |
| Measurement of gestational age, n (%)               |                 |               |                         |               |                      |               |
| Last menstruation                                   | 1850 (86)       | 1900 (87)     | 1138 (83)               | 1165 (84)     | 712 (92)             | 735 (92)      |
| Uterine height                                      | 284 (13)        | 272 (12)      | 222 (16)                | 211 (15)      | 62 (8)               | 61 (7)        |
| Missing                                             | 8 (1)           | 12 (1)        | 6 (1)                   | 7 (1)         | 2 (0)                | 5 (1)         |
| Previous abortions, n (%)                           |                 |               |                         |               |                      |               |
| Yes                                                 | 274 (13)        | 298 (14)      | 165 (12)                | 180 (13)      | 109 (14)             | 118 (15)      |
| No                                                  | 1861 (87)       | 1881 (86)     | 1197 (88)               | 1201 (87)     | 664 (86)             | 680 (85)      |
| Missing                                             | 7 (0)           | 5 (0)         | 4 (0)                   | 2 (0)         | 3 (0)                | 3 (0)         |
| Previous stillbirths, n (%)                         |                 |               |                         |               |                      |               |
| Yes                                                 | 172 (8)         | 176 (8)       | 79 (6)                  | 94 (7)        | 93 (12)              | 82 (10)       |
| No                                                  | 1962 (92)       | 2002 (92)     | 1284 (94)               | 1287 (93)     | 678 (87)             | 715 (89)      |
| Missing                                             | 8 (0)           | 6 (0)         | 3 (0)                   | 2 (0)         | 5 (1)                | 4 (1)         |
| Number of previous deliveries, n (%)                |                 |               |                         |               |                      |               |
| None                                                | 631 (30)        | 699 (32)      | 429 (31)                | 476 (34)      | 202 (26)             | 223 (28)      |
| One                                                 | 671 (31)        | 658 (30)      | 434 (32)                | 436 (32)      | 237 (31)             | 222 (28)      |
| Two                                                 | 399 (19)        | 397 (18)      | 237 (17)                | 236 (17)      | 162 (21)             | 161 (20)      |
| Three or more                                       | 435 (20)        | 425 (20)      | 262 (19)                | 233 (17)      | 173 (22)             | 192 (24)      |
| Missing                                             | 6 (0)           | 5 (0)         | 4 (1)                   | 2 (0)         | 2 (0)                | 3 (0)         |
| Number of previous live births, n (%)               |                 |               |                         |               |                      |               |
| None                                                | 652 (30)        | 719 (33)      | 443 (32)                | 493 (36)      | 209 (27)             | 226 (28)      |
| One                                                 | 665 (31)        | 658 (30)      | 430 (32)                | 434 (31)      | 235 (30)             | 224 (28)      |
| Two                                                 | 402 (19)        | 391 (18)      | 240 (18)                | 234 (17)      | 162 (21)             | 157 (20)      |
| Three or more                                       | 418 (20)        | 411 (19)      | 249 (18)                | 220 (16)      | 169 (22)             | 191 (24)      |
| Missing                                             | 5 (0)           | 5 (0)         | 4 (0)                   | 2 (0)         | 1 (0)                | 3 (0)         |
| HIV status, n (%)                                   |                 |               |                         |               |                      |               |
| Positive                                            | 446 (21)        | 428 (20)      | 271 (20)                | 251 (18)      | 175 (23)             | 177 (22)      |
| Negative                                            | 1696 (79)       | 1756 (80)     | 1095 (80)               | 1132 (82)     | 601 (77)             | 624 (78)      |
| Haemoglobin by HemoCue (g/dL), mean (SD)‡           | 9.6 (1.7)       |               | 9.6 (1.7)               |               | 9.7 (1.7)            |               |
| Haemoglobin by HemoCue (g/dL), n (%)                |                 |               |                         |               |                      |               |
| < 7.0                                               | 141 (7)         |               | 102 (8)                 |               | 39 (5)               |               |
| 7.0–8.90                                            | 535 (25)        |               | 343 (25)                |               | 192 (25)             |               |
| 9.0–9.90                                            | 512 (24)        |               | 336 (25)                |               | 176 (23)             |               |
| 10.0–10.90                                          | 462 (22)        |               | 294 (22)                |               | 168 (22)             |               |
| 11.0–11.90                                          | 298 (14)        |               | 168 (12)                |               | 130 (17)             |               |
| ≥12.0                                               | 174 (8)         |               | 110 (8)                 |               | 64 (8)               |               |
| Not measured                                        | 20 (1)          |               | 13 (1)                  |               | 7 (1)                |               |
| Iron + folic acid given, n (%)                      |                 |               |                         |               |                      |               |
| Yes                                                 | 708 (33)        | 2164 (99)     | 464 (34)                | 1368 (99)     | 244 (32)             | 796 (99)      |
| No                                                  | 1421 (66)       | 14 (1)        | 892 (65)                | 11 (1)        | 529 (68)             | 3 (0)         |
| Missing                                             | 13 (1)          | 6 (0)         | 10 (1)                  | 4 (0)         | 3 (0)                | 2 (0)         |
| Only folic acid given, n (%)                        |                 |               |                         |               |                      |               |
| Yes                                                 | 1426 (67)       | 15 (1)        | 894 (65)                | 10 (1)        | 532 (69)             | 5 (1)         |
| No                                                  | 701 (33)        | 2159 (99)     | 460 (34)                | 1367 (99)     | 241 (31)             | 792 (99)      |
| Missing                                             | 15 (0)          | 10 (0)        | 12 (1)                  | 6 (0)         | 3 (0)                | 4 (0)         |
| Fever during current pregnancy, n (%)               |                 |               |                         |               |                      |               |
| Yes                                                 | 550 (26)        | 527 (24)      | 405 (30)                | 377 (27)      | 145 (19)             | 150 (19)      |
| Headache during current pregnancy, n (%)            |                 |               |                         |               |                      |               |
| Yes                                                 | 917 (43)        | 944 (43)      | 634 (46)                | 682 (49)      | 283 (37)             | 262 (33)      |
| Cold/chills during current pregnancy, n (%)         |                 |               |                         |               |                      |               |
| Yes                                                 | 412 (19)        | 406 (19)      | 299 (22)                | 298 (22)      | 113 (15)             | 108 (14)      |
| Vomit/nausea during current pregnancy, n (%)        |                 |               |                         |               |                      |               |
| Yes                                                 | 612 (29)        | 605 (28)      | 434 (32)                | 444 (32)      | 178 (23)             | 161 (20)      |
| Body aches during current pregnancy, n (%)          |                 |               |                         |               |                      |               |
| Yes                                                 | 487 (23)        | 488 (22)      | 361 (26)                | 379 (27)      | 126 (16)             | 109 (14)      |
| Malaria prophylaxis during current pregnancy, n (%) |                 |               |                         |               |                      |               |
| Yes                                                 | 856 (40)        | 923 (42)      | 481 (35)                | 499 (36)      | 375 (48)             | 424 (53)      |
| Malaria during current pregnancy, n (%)             |                 |               |                         |               |                      |               |
| Yes                                                 | 125 (6)         | 135 (6)       | 84 (6)                  | 86 (6)        | 41 (5)               | 49 (6)        |
| Had malaria test, n (%)                             |                 |               |                         |               |                      |               |
| Yes                                                 | 159 (7)         | 164 (8)       | 107 (8)                 | 107 (8)       | 52 (7)               | 57 (7)        |

\*Policy 2: daily intake of 400 µg of folic acid and received iron (120 mg) if their haemoglobin was <9 g/dL. †Policy 1: daily intake of 60 mg ferrous sulphate plus 400 µg of folic acid. ‡Missing data excluded when calculating the mean and standard deviation: maternal age (Selective n = 21, Routine n = 14); gestational age (Selective n = 8, Routine n = 12); haemoglobin (Selective n = 20).

**Table 3.** Number of prenatal visits by study group and centre of study

| Number of visits                 | All             |                           | 1° de Maio study centre <sup>§</sup> |                           | Machava study centre <sup>§</sup> |                           |
|----------------------------------|-----------------|---------------------------|--------------------------------------|---------------------------|-----------------------------------|---------------------------|
|                                  | <i>n</i> = 4326 |                           | <i>n</i> = 2749                      |                           | <i>n</i> = 1577                   |                           |
|                                  | Selective iron* | Routine iron <sup>†</sup> | Selective iron*                      | Routine iron <sup>†</sup> | Selective iron <sup>†</sup>       | Routine iron <sup>†</sup> |
|                                  | <i>n</i> = 2142 | <i>n</i> = 2184           | <i>n</i> = 1366                      | <i>n</i> = 1383           | <i>n</i> = 776                    | <i>n</i> = 801            |
| One, <i>n</i> (%) <sup>‡</sup>   | 0 (0)           | 0 (0)                     | 0 (0)                                | 0 (0)                     | 0 (0)                             | 0 (0)                     |
| Two, <i>n</i> (%) <sup>‡</sup>   | 633 (30)        | 595 (27)                  | 424 (31)                             | 396 (29)                  | 209 (27)                          | 199 (25)                  |
| Three, <i>n</i> (%) <sup>‡</sup> | 462 (22)        | 513 (23)                  | 287 (21)                             | 319 (23)                  | 175 (23)                          | 194 (24)                  |
| Four, <i>n</i> (%) <sup>‡</sup>  | 299 (14)        | 321 (15)                  | 177 (13)                             | 192 (14)                  | 122 (16)                          | 129 (16)                  |
| Five+, <i>n</i> (%) <sup>‡</sup> | 247 (12)        | 247 (11)                  | 146 (11)                             | 151 (11)                  | 101 (13)                          | 96 (12)                   |

\*Daily intake of 400 µg of folic acid and received iron (120 mg) if their haemoglobin was <9 g/dL. <sup>†</sup>Daily intake of 60 mg ferrous sulphate plus 400 µg of folic acid. <sup>‡</sup>The denominator is the number of subjects in each trial arm. <sup>§</sup>There were no significant differences between the iron groups and within each study centre.

**Table 4.** Pregnancy week at subsequent visits after enrolment by study group and centre of study

| Pregnancy week at subsequent visits                | All             |                           | 1° de Maio study centre |                           | Machava study centre |                           |
|----------------------------------------------------|-----------------|---------------------------|-------------------------|---------------------------|----------------------|---------------------------|
|                                                    | Selective iron* | Routine iron <sup>†</sup> | Selective iron*         | Routine iron <sup>†</sup> | Selective iron*      | Routine iron <sup>†</sup> |
|                                                    | <i>n</i> = 2142 | <i>n</i> = 2184           | <i>n</i> = 1366         | <i>n</i> = 1383           | <i>n</i> = 776       | <i>n</i> = 801            |
| First subsequent visit, <i>n</i> (%) <sup>‡</sup>  | 1455 (68)       | 1494 (68)                 | 938 (69)                | 965 (70)                  | 517 (67)             | 529 (66)                  |
| <30 week <sup>§</sup>                              | 991 (68)        | 1011 (68)                 | 635 (68)                | 659 (68)                  | 356 (69)             | 352 (66)                  |
| 30–34 week <sup>§</sup>                            | 293 (20)        | 309 (21)                  | 171 (18)                | 179 (19)                  | 122 (24)             | 130 (25)                  |
| ≥35 week <sup>§</sup>                              | 83 (6)          | 78 (5)                    | 52 (6)                  | 40 (4)                    | 31 (6)               | 38 (7)                    |
| Missing <sup>§</sup>                               | 88 (6)          | 96 (6)                    | 80 (8)                  | 87 (9)                    | 8 (1)                | 9 (2)                     |
| Second subsequent visit, <i>n</i> (%) <sup>‡</sup> | 1040 (49)       | 1106 (51)                 | 618 (45)                | 677 (49)                  | 422 (54)             | 429 (54)                  |
| <30 week <sup>§</sup>                              | 523 (50)        | 515 (47)                  | 329 (53)                | 356 (53)                  | 194 (46)             | 159 (37)                  |
| 30–34 week <sup>§</sup>                            | 311 (30)        | 377 (34)                  | 168 (27)                | 204 (30)                  | 143 (34)             | 173 (40)                  |
| ≥35 week <sup>§</sup>                              | 163 (16)        | 176 (16)                  | 82 (14)                 | 81 (12)                   | 81 (19)              | 95 (22)                   |
| Missing <sup>§</sup>                               | 43 (4)          | 38 (3)                    | 39 (6)                  | 36 (5)                    | 4 (1)                | 2 (1)                     |
| Third subsequent visit, <i>n</i> (%) <sup>‡</sup>  | 694 (33)        | 720 (33)                  | 398 (29)                | 412 (30)                  | 296 (38)             | 308 (38)                  |
| <30 week <sup>§</sup>                              | 186 (27)        | 173 (24)                  | 129 (32)                | 123 (30)                  | 57 (20)              | 50 (16)                   |
| 30–34 week <sup>§</sup>                            | 265 (38)        | 304 (42)                  | 140 (35)                | 180 (44)                  | 125 (42)             | 124 (40)                  |
| ≥35 week <sup>§</sup>                              | 208 (30)        | 219 (31)                  | 98 (25)                 | 85 (20)                   | 110 (37)             | 134 (44)                  |
| Missing <sup>§</sup>                               | 35 (5)          | 24 (3)                    | 31 (8)                  | 24 (6)                    | 4 (1)                | 0 (0)                     |

\*Daily intake of 400 µg of folic acid and received iron (120 mg) if their haemoglobin was <9 g/dL. <sup>†</sup>Daily intake of 60 mg of ferrous sulphate plus 400 µg of folic acid. <sup>‡</sup>Frequency and percentage of women at recruitment who attended subsequent visits. <sup>§</sup>The denominator is the number of those who attended at each subsequent visit.

study protocol (uptake of the recommended tablets) was good. Several administrative and practical challenges were encountered during the course of the trial, from planning through to the process of implementation. A pilot trial carried out in the study contexts before the actual trial highlighted areas that needed to be resolved prior to the main trial.

Despite the widespread recommendation of prophylactic iron supplementation during pregnancy, the data available provide insufficient evidence on its benefits to maternal and child health in low-income settings. In malaria-prone settings, the small sample sizes, exclusion by outcomes and large dropouts that have characterised previous trials has meant the

**Table 5.** Measure of compliance by the personnel assessed by frequency of measuring haemoglobin (Selective iron group) and given iron and folic acid (Routine iron group) during subsequent visits, by group and centre

| Subsequent visit after enrolment                   | All             |                           | 1° de Maio study centre |                           | Machava study centre |                           |
|----------------------------------------------------|-----------------|---------------------------|-------------------------|---------------------------|----------------------|---------------------------|
|                                                    | <i>n</i> = 4326 |                           | <i>n</i> = 2749         |                           | <i>n</i> = 1577      |                           |
|                                                    | Selective iron* | Routine iron <sup>†</sup> | Selective iron*         | Routine iron <sup>†</sup> | Selective iron*      | Routine iron <sup>†</sup> |
|                                                    | <i>n</i> = 2142 | <i>n</i> = 2184           | <i>n</i> = 1366         | <i>n</i> = 1383           | <i>n</i> = 776       | <i>n</i> = 801            |
| First subsequent visit, <i>n</i> (%) <sup>‡</sup>  | 1455 (68)       | 1494 (68)                 | 938 (69)                | 965 (70)                  | 517 (67)             | 529 (66)                  |
| Haemoglobin measured, <i>n</i> (%) <sup>§</sup>    |                 |                           |                         |                           |                      |                           |
| HemoCue                                            | 1416 (97)       | 156 (10)                  | 919 (98)                | 142 (15)                  | 497 (96)             | 14 (3)                    |
| Iron given, <i>n</i> (%) <sup>§</sup>              | 493 (34)        | 1460 (98)                 | 320 (34)                | 948 (98)                  | 173 (33)             | 512 (97)                  |
| Folic acid only given, <i>n</i> (%) <sup>§</sup>   | 946 (65)        | 29 (2)                    | 603 (64)                | 11 (1)                    | 343 (66)             | 18 (3)                    |
| Second subsequent visit, <i>n</i> (%) <sup>‡</sup> | 1040 (49)       | 1106 (51)                 | 618 (45)                | 677 (49)                  | 422 (54)             | 429 (54)                  |
| Haemoglobin measured, <i>n</i> (%) <sup>§</sup>    |                 |                           |                         |                           |                      |                           |
| HemoCue                                            | 1000 (96)       | 66 (6)                    | 618 (100)               | 52 (8)                    | 396 (94)             | 14 (3)                    |
| Iron given, <i>n</i> (%) <sup>§</sup>              | 350 (34)        | 1090 (99)                 | 210 (34)                | 670 (99)                  | 140 (33)             | 420 (98)                  |
| Folic acid only given, <i>n</i> (%) <sup>§</sup>   | 671 (65)        | 16 (1)                    | 392 (63)                | 7 (1)                     | 279 (66)             | 9 (2)                     |
| Third subsequent visit, <i>n</i> (%) <sup>‡</sup>  | 694 (33)        | 720 (33)                  | 398 (29)                | 412 (30)                  | 296 (38)             | 308 (38)                  |
| Haemoglobin measured, <i>n</i> (%) <sup>§</sup>    |                 |                           |                         |                           |                      |                           |
| HemoCue                                            | 673 (97)        | 16 (2)                    | 389 (98)                | 9 (2)                     | 284 (96)             | 7 (2)                     |
| Iron given, <i>n</i> (%) <sup>§</sup>              | 185 (27)        | 707 (98)                  | 110 (28)                | 405 (98)                  | 75 (25)              | 302 (98)                  |
| Folic acid only given, <i>n</i> (%) <sup>§</sup>   | 495 (71)        | 13 (2)                    | 277 (70)                | 6 (1)                     | 218 (74)             | 7 (2)                     |

\*Daily intake of 400 µg of folic acid and received iron (120 mg) if their haemoglobin was <9 g/dL. <sup>†</sup>Daily intake of 60 mg of ferrous sulphate plus 400 µg of folic acid. <sup>‡</sup>Frequency and percentage of women at recruitment who attended subsequent visits. <sup>§</sup>The denominator is the number of those who attended at each subsequent visit.

**Table 6.** Measure of compliance by women's reports, by group and centre

| Subsequent visit after enrolment                              | All             |                           | 1° de Maio study centre |                           | Machava study centre |                           |
|---------------------------------------------------------------|-----------------|---------------------------|-------------------------|---------------------------|----------------------|---------------------------|
|                                                               | <i>n</i> = 4326 |                           | <i>n</i> = 2749         |                           | <i>n</i> = 1577      |                           |
|                                                               | Selective iron* | Routine iron <sup>†</sup> | Selective iron*         | Routine iron <sup>†</sup> | Selective iron*      | Routine iron <sup>†</sup> |
|                                                               | <i>n</i> = 2142 | <i>n</i> = 2184           | <i>n</i> = 1366         | <i>n</i> = 1383           | <i>n</i> = 776       | <i>n</i> = 801            |
| First subsequent visit, <i>n</i> (%) <sup>‡</sup>             | 1455 (68)       | 1494 (68)                 | 938 (69)                | 965 (70)                  | 517 (67)             | 529 (66)                  |
| Tablets taken during the past week, <i>n</i> (%) <sup>§</sup> |                 |                           |                         |                           |                      |                           |
| Regularly                                                     | 1344 (92)       | 1380 (92)                 | 883 (94)                | 912 (95)                  | 461 (89)             | 468 (88)                  |
| Sometimes                                                     | 90 (6)          | 88 (6)                    | 42 (4)                  | 35 (4)                    | 48 (9)               | 53 (10)                   |
| No                                                            | 15 (1)          | 20 (1)                    | 7 (1)                   | 14 (1)                    | 8 (2)                | 6 (1)                     |
| Second subsequent visit, <i>n</i> (%) <sup>‡</sup>            | 1040 (49)       | 1106 (51)                 | 618 (45)                | 677 (49)                  | 422 (54)             | 429 (54)                  |
| Tablets taken during the past week, <i>n</i> (%) <sup>§</sup> |                 |                           |                         |                           |                      |                           |
| Regularly                                                     | 962 (93)        | 1031 (93)                 | 588 (95)                | 652 (96)                  | 374 (87)             | 379 (88)                  |
| Sometimes                                                     | 70 (7)          | 60 (5)                    | 24 (4)                  | 15 (2)                    | 46 (11)              | 45 (10)                   |
| No                                                            | 5 (0.5)         | 8 (0.7)                   | 4 (0.6)                 | 7 (1)                     | 1 (0.2)              | 1 (0.2)                   |
| Third subsequent visit, <i>n</i> (%) <sup>‡</sup>             | 694 (33)        | 720 (33)                  | 398 (29)                | 412 (30)                  | 296 (38)             | 308 (38)                  |
| Tablets taken during the past week, <i>n</i> (%) <sup>§</sup> |                 |                           |                         |                           |                      |                           |
| Regularly                                                     | 647 (93)        | 670 (93)                  | 381 (96)                | 402 (98)                  | 266 (90)             | 268 (87)                  |
| Sometimes                                                     | 43 (6)          | 46 (6)                    | 15 (4)                  | 7 (2)                     | 28 (9)               | 39 (13)                   |
| No                                                            | 3 (0.4)         | 3 (0.4)                   | 2 (0.5)                 | 2 (0.5)                   | 1 (0.3)              | 1 (0.3)                   |

\*Daily intake of 400 µg of folic acid and received iron (120 mg) if their haemoglobin was <9 g/dL. <sup>†</sup>Daily intake of 60 mg of ferrous sulphate plus 400 µg of folic acid. <sup>‡</sup>Frequency and percentage of women at recruitment who attended subsequent visits. <sup>§</sup>The denominator is the number of those who attended at each subsequent visit.

evidence falls short in clarifying the advantages and disadvantages of prophylactic iron supplementation during pregnancy [APHA, Atlanta, 2001 (T. Juncker *et al.*, unpublished observations)] (Fleming *et al.* 1986; Menendez *et al.* 1994; Preziosi *et al.* 1997; Ndyomugenyi & Magnussen 2000). Although the trials from non-malarial areas generally had large sample sizes and better designs, their results are conflicting (Zeng *et al.* 2008; Christian *et al.* 2003a,b, 2008, 2009a,b, 2010), while the results from non-malarial areas may not be applicable in malarial settings.

Unlike previous studies that employed explanatory designs to test the efficacy of prenatal iron prophylaxis, we utilised the pragmatic trial design so as to compare the effectiveness of two policies for prophylactic iron administration. Pragmatic trials are more suitable to study effects in normal clinical practice; they have the basic aim of informing choice between treatments (Roland & Torgerson 1998; MacPherson 2004). A pragmatic trial design was useful to compare two policies of iron supplementation in a real-life situation. In these types of trials, placebo and blinding are not customary (Roland & Torgerson 1998; MacPherson 2004). Although several calls have been made to increase the use of pragmatic trials to address clinical questions, they are rarely used and researchers are less experienced with them (Zwarenstein *et al.* 2008). For this reason, tutoring was necessary for the local research team prior to the trial starting.

As a cut-off to define anaemia, we used haemoglobin values lower than 9 g/dL. The WHO's haemoglobin cut-off level for determining anaemia during pregnancy is 11 g/dL (WHO 1972). Thus, our cut-off value can be questioned. However, the WHO recommended value is based on haemoglobin levels of women in developed countries. For developing countries, clinical signs of symptoms of anaemia usually appear when the haemoglobin level is below 7 g/dL (van den Broek *et al.* 1999). At the planning stage, we asked health care providers in Maputo about the acceptable cut-off point for haemoglobin level requiring iron treatment. Their opinions varied between 8 and 11 g/dL. Based on this feedback, we concluded that using a 9 g/dL cut-off level for treatment with iron would not endanger the woman's or fetus's health, and would also enable us to answer the

research questions. An earlier study on anaemia during pregnancy in Mozambique found that 5–15% of pregnant women had haemoglobin values below 9 g/dL and that 58% had levels below 11 g/dL (Liljestrand *et al.* 1986).

Although the study health centres had previously conducted RCTs in relation to HIV, it nevertheless remained a delicate issue at the time of the study, both at the grass roots level and among higher authorities. Despite this and the voluntary nature of HIV testing, almost all the women (99%) underwent the test. This facilitated our study.

Carrying out this trial was challenging. One key challenge was the sluggishness of administrative and financial procedures. Planning the trial took a long time as did obtaining authorisations from the ethics committees and the local authorities. There was no research infrastructure in the local health care and the existing tradition did not value accurate record keeping. In addition, university facilities were modest and money transfers were cumbersome.

Finding qualified research assistants for the study posed another challenge. We chose retired nurses, as having older and experienced nurses created an environment of trust among the women. However, it took time to train them in the study procedures. Another problem centred on the study nurses receiving a higher salary than MCH nurses, which may have undermined support for the study among MCH nurses. We gave small monthly incentives to the MCH nurses for their collaboration, but that may not have been enough. MCH nurses may not have always informed the women that they needed to see the study nurses. This issue was more likely at the 1° de Maio health centre where the study location was different to that of usual prenatal care consultation.

The number of women participating declined with each subsequent visit. The reasons could not be ascertained, but they may have been due to having no further prenatal visits, women visiting other health centres, or data not being collected. However, considering that a majority of the women were at 30–34 weeks of gestation at their final visit, it is possible that most of them might have delivered already. We are investigating the potential reasons for why women missed subsequent visits. Our data suggest that the

compliance of both the study nurses and the women was good. Women were given their tablets at each visit. To assess whether they complied, they were asked in each visit about the frequency of taking their tablets. We cannot be sure how reliably women answered as they might have been intimidated by the nurses. The nurses, however, were instructed to encourage the women to tell the truth and they were informed that any answers they provided were acceptable.

The greatest challenge in the trial was gathering birth data by the planned method. This led to changes in the data collection protocol and presently, we are tracing the women's birth data from health centres, hospitals and death registers. This has prolonged the outcome data collection and increased the study costs. Possible reasons for losing birth data include: a miscarriage or home birth with no notification sent to the study health centre; the mother dying or moving from the area before birth; the mother delivering outside the study locations (self-referrals); delivery nurses not putting the study cards aside; and mothers not having their study cards at delivery.

## Conclusions

The planned trial proved feasible in an ordinary health care setting in Maputo. The loss of mothers' delivery data might have been avoided by better surveillance of the process during the trial and better knowledge of the actual patient flow patterns in Maputo.

## Acknowledgements

We thank Ana Dai (Ministry of Health) for the field work and the study nurses Marcelina Bie, Eulalia Muianga and Rebeca Marulino.

## Source of funding

The study was funded by two grants from the Academy of Finland (2004: 210631; 2010: 139191).

## Conflicts of interest

The authors declare that they have no conflicts of interest.

## Contributions

BIN, SP, EH designed, analysed and prepared the present paper. EH designed and is responsible for the conception of the PROFEG Trial. SP, FA, GS, BC, OA, JC, MD and MN participated in the planning of the PROFEG Trial, made substantial contribution in its execution and participated in the interpretation of results and the critical review of the paper. OA and ER were responsible for data acquisition and preparation, interpretation of results and for the critical review of the paper.

## References

- Adetifa I. & Okomo U. (2009) Iron supplementation for reducing morbidity and mortality in children with HIV. *Cochrane Database of Systematic Reviews* (1), CD006736.
- Boelaert J.R., Weinberg G.A. & Weinberg E.D. (1996) Altered iron metabolism in HIV infection: mechanisms, possible consequences, and proposals for management. *Infectious Agents and Disease* 5, 36–46.
- Brabin B.J., Hakimi M. & Pelletier D. (2001) An analysis of anemia and pregnancy-related maternal mortality. *Journal of Nutrition* 131, 604S–615S.
- van den Broek N.R., Ntonya C., Mhango E. & White S.A. (1999) Diagnosing anaemia in pregnancy in rural clinics: assessing the potential of the haemoglobin colour scale. *Bulletin of World Health Organization* 77, 15–21.
- Christian P., Khattry S.K., Katz J., Pradhan E.K., LeClerg S.C., Shrestha S.R. *et al.* (2003a) Effects of alternative maternal micronutrient supplements on low birth weight in rural Nepal: a double blind randomized community trial. *British Medical Journal* 326, 571.
- Christian P., West K.P., Khattry S.K., LeClerg S.C., Pradhan E.K., Katz J. *et al.* (2003b) Effects of maternal micronutrient supplementation on fetal loss and infant mortality: a cluster-randomized trial in Nepal. *American Journal of Clinical Nutrition* 78, 1194–1202.
- Christian P., Darmstadt G.L., Wu L., Khattry S.K., Leclerg S.C., Katz J. *et al.* (2008) The effect of maternal micronutrient supplementation on early neonatal morbidity in rural Nepal: a randomized, control, community trial. *Archives Disease in Childhood* 93, 660–664.



- Christian P., Khatry S.K., LeClerq S.C. & Dali S.M. (2009a) Effects of prenatal micronutrient supplementation on complications of labor and delivery and puerperal morbidity in rural Nepal. *International Journal of Gynaecology and Obstetrics* **106**, 3–7.
- Christian P., Stewart C.P., LeClerq S.C., Wu L., Katz J., West K.P. *et al.* (2009b) Antenatal and postnatal iron supplementation and childhood mortality in rural Nepal: a prospective follow-up in a randomized, controlled community trial. *American Journal of Epidemiology* **170**, 1127–1136.
- Christian P., Murray-Kolb L.E., Khatry S.K., Katz J., Schaefer B.A., Cole P.M. *et al.* (2010) Prenatal micronutrient supplementation and intellectual and motor function in early school-aged children in Nepal. *Journal of American Medical Association* **304**, 2716–2723.
- Fall C.H., Fisher D.J., Osmond C., Margetts B.M. & Maternal Micronutrient Supplementation Study Group (2009) Multiple micronutrient supplementation during pregnancy in low-income countries: a meta-analysis of effects on birth size and length of gestation. *Food and Nutrition Bulletin* **30**, S533–S546.
- Fleming A.F., Ghatoura G.B.S., Harrison K.A., Briggs N.D. & Dunn D.T. (1986) The prevention of anaemia in pregnancy in primigravidae in the guinea savanna of Nigeria. *Annals of Tropical Medicine and Parasitology* **80**, 211–233.
- Gera T. & Sachdev H.P.S. (2002) Effect of iron supplementation on incidence of infectious illness in children: systematic review. *British Medical Journal* **325**, 1142.
- Gordeuk V.R., Delanghe J.R., Langlois M.R. & Boelaert J.R. (2001) Iron status and the outcome of HIV infection: an overview. *Journal of Clinical Virology* **20**, 111–115.
- Hemminki E. & Rimpelä U. (1991) A randomized comparison of routine versus selective iron supplementation during pregnancy. *Journal of the American College of Nutrition* **10**, 3–10.
- Idemiyor V. (2007) Human immunodeficiency virus (HIV) and malaria interaction in sub-Saharan Africa: the collision of two titans. *HIV Clinical Trials* **8**, 246–253.
- Kabyemela E.R., Fried M., Kurtis J.D., Mutabingwa T.K. & Duffy P.E. (2008) Decreased susceptibility to *Plasmodium falciparum* infection in pregnant women with iron deficiency. *Journal of Infectious Diseases* **198**, 163–166.
- Lao T.T., Tam K.F. & Chan L.Y. (2000) Third trimester iron status and pregnancy outcome in non-anaemic women: pregnancy unfavourably affected by maternal iron excess. *Human Reproduction* **15**, 1843–1848.
- Lawn J.E., Cousens S., Zupan J. & Lancet Neonatal Survival Steering Team (2005) 4 million neonatal deaths: when? Where? Why? *Lancet* **365**, 891–900.
- Liljestrand J., Bergström S. & Birgergård G. (1986) Anaemia of pregnancy in Mozambique. *Transactions of the Royal Society of Tropical Medicine and Hygiene* **80**, 249–255.
- Lindlöw M., Ward P. & Zorzi N. (2004) *Primary Health Care in Mozambique: Service Delivery in a Complex Hierarchy*. The World Bank: Washington, DC.
- MacPherson H. (2004) Pragmatic clinical trials. *Complementary Therapies in Medicine* **12**, 136–140.
- McLean E., Cogswell M., Egli I., Wojdyla D. & de Benoist B. (2009) Worldwide prevalence of anaemia, WHO Vitamin and Mineral Nutrition Information System, 1993–2005. *Public Health Nutrition*. **12**, 444–454.
- Measure Demographic and Health Surveys (2009) Mozambique: Standard AIDS Indicator Survey.
- Menendez C., Todd J., Alonso P.L., Francis N., Lulat S., Ceesay S. *et al.* (1994) The effects of iron supplementation during pregnancy, given by traditional birth attendants, on the prevalence of anaemia and malaria. *Transactions of the Royal Society of Tropical Medicine and Hygiene* **88**, 590–593.
- Mozambican Ministry of Health (May 2002) [Guide to the implementation of the programme; Prevention of Mother to Child Transmission of HIV/AIDS] (Portuguese).
- Müngen E. (2003) Iron supplementation in pregnancy. *Journal of Perinatal Medicine* **31**, 420–426.
- Ndyomugenyi R. & Magnussen P. (2000) Chloroquine prophylaxis, iron/folic-acid supplementation or case management of malaria attacks in primigravidae in western Uganda: effects on congenital malaria and infant haemoglobin concentrations. *Annals of Tropical Medicine and Parasitology* **94**, 759–770.
- Ojukwu J.U., Okebe J.U., Yahav D. & Paul M. (2009) Oral iron supplementation for preventing or treating anaemia among children in malaria-endemic areas. *Cochrane Database Systematic Reviews* (3), CD006589.
- Oppenheimer S.J. (2001) Iron and its relation to immunity and infectious disease. *Journal of Nutrition* **131**, 616S–633S.
- Parkkali S., Abacassamo F., Salomé G., Augusto O. & Nikula M. (2008) Routine iron prophylaxis during pregnancy: effects on maternal and child health in Maputo City and the urban part of Maputo Province Mozambique (PROFEG). Stakes Discussion Papers 1/2008. Helsinki: STAKES.
- Peña-Rosas J.P. & Viteri F.E. (2009) Effects and safety of preventive oral iron or iron + folic acid supplementation for women during pregnancy. *Cochrane Database Systematic Reviews* (4), CD004736.
- Prentice A.M. (2008) Iron metabolism, malaria, and other infections: what is all the fuss about? *Journal of Nutrition* **138**, 2537–2541.

- Preziosi P, Prual A., Galan P, Daouda H., Boureima H. & Hercberg S. (1997) Effect of iron supplementation on the iron status of pregnant women: consequences for newborns. *American Journal of Clinical Nutrition* **66**, 1178–1182.
- Roland M. & Torgerson D.J. (1998) Understanding controlled trials: what are pragmatic trials? *British Medical Journal* **316**, 285.
- Sazawal S., Black R.E., Ramsan M., Chwaya H.M., Stoltzfus R.J., Dutta A. *et al.* (2006) Effects of routine prophylactic supplementation with iron and folic acid on admission to hospital and mortality in preschool children in a high malaria transmission setting: community-based, randomized, placebo-controlled trial. *Lancet* **367**, 133–143.
- Stoltzfus R.J. (2001) Iron-deficiency anemia: reexamining the nature and magnitude of the public health problem. Summary: implications for research and programs. *Journal of Nutrition* **131**, 697S–700S.
- Stoltzfus R.J., Mullanny L. & Black R.E. (2004) Iron deficiency anaemia. In: *Comparative Quantification of Health Risks: Global and Regional Burden of Disease Attributable to Selected Major Risk Factors* (eds M. Ezzati, A.D. Lopez, A. Rodgers & C.J.L. Murray), Vol. 1, pp 163–209. World Health Organization: Geneva, Switzerland.
- The World Bank (2011) *Country Indicators, Mozambique*. Available at: <http://data.worldbank.org/indicator> (Accessed 7 March 2011).
- Villar J., Merialdi M., Gülmezoglu M., Abalos E., Carroli G., Kulier R. *et al.* (2003) Nutritional interventions during pregnancy for the prevention or treatment of maternal mortality and preterm delivery: an overview of randomized controlled trials. *Journal of Nutrition* **133**, 1606S–1625S.
- WHO (1972) *Nutritional anaemias*. Report of a WHO Group of Experts. (WHO Technical Report Series, No. 503). World Health Organization: Geneva.
- WHO (2011) *International Travel and Health 2011*. Available at: <http://www.who.int/ith/chapters/ith2011chap7.pdf> (Accessed 20 February 2011).
- Yip R. (2000) Significance of an abnormally low or high hemoglobin concentration during pregnancy: special consideration of iron nutrition. *American Journal of Clinical Nutrition* **72**, 272S–279S.
- Zeng L., Cheng Y., Dang S., Chang S., Kong L. & Yan H. (2008) Impact of micronutrient supplementation during pregnancy on birth weight, duration of gestation, and perinatal mortality in rural western China: double blind cluster randomized controlled trial. *British Medical Journal* **337**, a2001.
- Zwarenstein M., Treweek S., Gagnier J.J., Altman D.G., Tunis S., Haynes B. *et al.* (2008) Improving the reporting of pragmatic trials: an extension of the CONSORT statement. *British Medical Journal* **337**, a2390.



**Comparison of routine prenatal iron prophylaxis and screening and treatment for anemia: pregnancy results and preliminary birth results from a pragmatic randomized controlled trial (PROFEG) in Maputo, Mozambique**

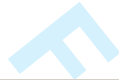

|                                 |                                                                                                                                                                                                                                                                                                                                                                                                                                                                                                                                                                                                                                                                                                                                                                                                                                                                                                             |
|---------------------------------|-------------------------------------------------------------------------------------------------------------------------------------------------------------------------------------------------------------------------------------------------------------------------------------------------------------------------------------------------------------------------------------------------------------------------------------------------------------------------------------------------------------------------------------------------------------------------------------------------------------------------------------------------------------------------------------------------------------------------------------------------------------------------------------------------------------------------------------------------------------------------------------------------------------|
| Journal:                        | <i>BMJ Open</i>                                                                                                                                                                                                                                                                                                                                                                                                                                                                                                                                                                                                                                                                                                                                                                                                                                                                                             |
| Manuscript ID:                  | bmjopen-2012-001948.R1                                                                                                                                                                                                                                                                                                                                                                                                                                                                                                                                                                                                                                                                                                                                                                                                                                                                                      |
| Article Type:                   | Research                                                                                                                                                                                                                                                                                                                                                                                                                                                                                                                                                                                                                                                                                                                                                                                                                                                                                                    |
| Date Submitted by the Author:   | 30-Nov-2012                                                                                                                                                                                                                                                                                                                                                                                                                                                                                                                                                                                                                                                                                                                                                                                                                                                                                                 |
| Complete List of Authors:       | Parkkali, Saara; National Institute for Health and Welfare, Health Services and Policy Research<br>Nwaru, Bright; University of Tampere, School of Health Sciences<br>Abacassamo, Fatima; Eduardo Mondlane University, Department of Community Health<br>Salomé, Graca; Eduardo Mondlane University, Department of Biochemistry, Biology, Genetics and Molecular Biology<br>Augusto, Orvalho; Eduardo Mondlane University, Department of Community Health<br>Regushevskaya, Elena; National Institute for Health and Welfare, Health Services and Policy Research<br>Dgedge, Martinho; Ministry of Health,<br>Sousa, Cesar; Eduardo Mondlane University, Department of Community Health<br>Cliff, Julie; Eduardo Mondlane University, Department of Community Health<br>Chilundo, Baltazar; Eduardo Mondlane University, Department of Community Health<br>hemminki, elina; THL, Health and Social Services |
| <b>Primary Subject Heading</b>: | Health services research                                                                                                                                                                                                                                                                                                                                                                                                                                                                                                                                                                                                                                                                                                                                                                                                                                                                                    |
| Secondary Subject Heading:      | Epidemiology, Global health, Health policy, Health services research, Reproductive medicine, obstetrics and gynaecology                                                                                                                                                                                                                                                                                                                                                                                                                                                                                                                                                                                                                                                                                                                                                                                     |
| Keywords:                       | HIV & AIDS < INFECTIOUS DISEASES, Nutrition < TROPICAL MEDICINE, Community child health < PAEDIATRICS, PREVENTIVE MEDICINE, PUBLIC HEALTH, Epidemiology < TROPICAL MEDICINE                                                                                                                                                                                                                                                                                                                                                                                                                                                                                                                                                                                                                                                                                                                                 |
|                                 |                                                                                                                                                                                                                                                                                                                                                                                                                                                                                                                                                                                                                                                                                                                                                                                                                                                                                                             |

SCHOLARONE™  
Manuscripts

1  
2  
3  
4  
5  
6  
7 **Comparison of routine prenatal iron prophylaxis and screening and treatment for anemia:**  
8  
9 **pregnancy results and preliminary birth results from a pragmatic randomized controlled trial**  
10  
11 **(PROFEG) in Maputo, Mozambique**  
12  
13  
14  
15

16 Saara Parkkali<sup>1</sup>, Fatima Abacassamo<sup>2</sup>, Bright I Nwaru<sup>3</sup>, Graca Salomé<sup>4</sup>, Orvalho Augusto<sup>2</sup>, Elena  
17 Regushevskaya<sup>1</sup>, Martinho Dgedge<sup>5</sup>, Cesar Sousa<sup>2</sup>, Julie Cliff<sup>2</sup>, Baltazar Chilundo<sup>2</sup>, Elina  
18 Hemminki<sup>1</sup>  
19  
20

21  
22  
23 <sup>1</sup>National Institute for Health and Welfare, Health Services and Policy Research, Helsinki, Finland  
24

25 <sup>2</sup>Department of Community Health, Eduardo Mondlane University, Maputo, Mozambique  
26  
27

28 <sup>3</sup>School of Health Sciences, University of Tampere, Tampere, Finland  
29

30 <sup>4</sup>Department of ~~Biochemistry, Biology, Genetics and Molecular Biology~~ Physiological Sciences,  
31  
32 Eduardo Mondlane University, Maputo, Mozambique  
33  
34

35 <sup>5</sup>Ministry of Health, Maputo, Mozambique  
36  
37  
38  
39

40 **Running Title: Prenatal iron prophylaxis and maternal child health**  
41

42 **Corresponding author:**

43 Bright I. Nwaru

44 School of Health Sciences

45 33014 University of Tampere

46 Finland

47 Telephone: +358440127648

48 Fax: +358401901665

49 Email address: [bright.nwaru@uta.fi](mailto:bright.nwaru@uta.fi)  
50  
51  
52  
53

**ABSTRACT**

**Objective:** To present the pregnancy results and interim birth results of a pragmatic randomized controlled trial comparing routine iron prophylaxis with screening and treatment for anemia during pregnancy in a setting of endemic malaria and HIV.

**Design:** A pragmatic randomized controlled trial

**Setting:** Two health centers (1° de Maio and Machava) in Maputo, Mozambique, a setting of endemic malaria and high prevalence of HIV.

**Participants:** Pregnant women (~~≥12 wk gestation;~~ ≥18 years old; non-high-risk pregnancy, N=4326) attending prenatal care consultation at the two health centers were recruited to the trial

**Interventions:** The women were randomly allocated to either Routine iron (n=2184; 60 mg ferrous sulphate plus 400 µg of folic acid daily throughout pregnancy) or Selective iron (n=2142; screening and treatment for anemia and daily intake of 1 mg of folic acid).

**Outcome measures:** The primary outcomes were preterm delivery (delivery <37 weeks of gestation) and low birth weight (<2500 grams). The secondary outcomes were symptoms suggestive of malaria and self-reported malaria during pregnancy; birth length; cesarean section; maternal and child health status after delivery.

**Results:** The number of follow-up visits was similar in the two groups. Between the first and fifth visits, the two groups were similar regarding the occurrence of fever, headache, cold/chills, nausea/vomiting, and body aches. There was a suggestion of increased incidence of self-reported malaria during pregnancy (odds ratio 1.37, 95% confidence interval 0.98-1.92) in the Routine iron group. Birth data were available for 1109 (51%) in the Routine iron and for 1149 (54%) in the Selective iron groups. The birth outcomes were relatively similar in the two groups. However, there was a suggestion (statistically non-significant) of poorer outcomes in the Routine iron group with regard to long hospital stay after birth (relative risk [RR] 1.43, 95% CI 0.97-1.26; risk difference

1  
2  
3  
4  
5  
6  
7 [RD] 0.02, 95% CI -0.00-0.03) and unavailability of delivery data (RR 1.06, 95% CI 1.00-1.13; RD  
8 0.03, 95% CI -0.01-0.07).

9  
10 **Conclusions:** These interim results suggest that routine iron prophylaxis during pregnancy did not  
11 confer advantage over screening and treatment for anemia regarding maternal and child health.  
12 Complete data on birth outcomes are being collected for firmer conclusions.  
13  
14

15  
16  
17  
18 **Trial registration:** The trial is registered at ClinicalTrials.gov, number NCT00488579 (June 2007).  
19 The first women were randomized to the trial proper April 2007- March 2008. The pilot was  
20 November 2006-March 2008. The 3-month lag was due to technical difficulties in completing trial  
21 registration.  
22  
23  
24

25  
26  
27  
28 **Funding:** The study was funded by two grants from the Academy of Finland (2004: 210631; 2010:  
29 139191).  
30  
31

32  
33  
34 **Keywords:** iron, pregnancy, birth, malaria, HIV, pragmatic trial, Mozambique  
35  
36  
37  
38  
39  
40  
41  
42  
43  
44  
45  
46  
47  
48  
49  
50  
51  
52  
53  
54  
55  
56  
57  
58  
59  
60

1  
2  
3  
4  
5  
6  
7  
8  
9 **ARTICLE SUMMARY:**

10  
11  
12 **Article focus:**

- 13  
14  
15 • The benefits of iron prophylaxis during pregnancy on maternal and child health in  
16 developing country settings with endemic malaria and high prevalence of HIV is unclear.  
17  
18 • Iron has been linked to increased risk of infections.  
19  
20 • Among children less than three years, there are indications of harm of universal iron  
21 prophylaxis.  
22  
23

24  
25  
26 **Key messages:**

- 27  
28 • Routine iron prophylaxis during pregnancy did not suggest better maternal and child health  
29 outcomes than screening and treatment for anemia in a setting of endemic malaria and HIV.  
30  
31

32  
33  
34 **Strengths and limitations of this study**

- 35  
36  
37 • So far, this represents the largest trial investigating the benefits of prophylactic iron during  
38 pregnancy on maternal and child health in malaria-endemic settings.  
39  
40  
41 • The compliance of the study nurses with the trial protocol and that of the women with  
42 regards to uptake of the iron and folic acid tablets was good, as was the follow-up during  
43 pregnancy.  
44  
45  
46  
47 • The collection of delivery data was challenging, resulting in up to an estimated 40% of  
48 missing birth data, which are now been traced ~~with~~ using various methods.  
49  
50

## INTRODUCTION

Despite widespread recommendation of routine iron prophylaxis during pregnancy, its benefits and risks for the mother and child, beyond the reduction of the risk of anemia, remain unclear, particularly in low-income settings. Reviews of randomized controlled trials (RCTs) done for the Cochrane Collaboration and the World Health Organization (WHO) have failed to conclude on the effects of whether routine iron prophylaxis during pregnancy is beneficial or harmful to pregnancy and birth outcomes.<sup>1,2</sup> There is some evidence that high hemoglobin concentration in late pregnancy may be associated with adverse effects on pregnancy.<sup>3,4</sup> Based on evidence from non-pregnant populations, it has also been suggested that iron increases the risk may advance the rate of infections.<sup>5-7</sup> The host requires iron for biochemical functioning, but iron may as well promote the replication of infectious agents.<sup>6</sup> For developing country settings which are still plagued by infectious diseases, such as malaria and HIV, the possible tential of association between iron to increase the risk of and infections raises serious public health concerns.<sup>8,9</sup>

Previous trials conducted in malarial developing country settings that have evaluated the effects of iron supplementation during pregnancy on maternal and child outcomes have been hampered by small samples, large dropouts, and several outcome-related exclusions.<sup>10-14</sup> The findings from the trials were conflicting on the role of prophylactic iron supplementation on birth weight, prematurity, perinatal mortality, incidence of malaria, and other pregnancy and birth outcomes. Consequently, the evidence they provide is insufficient in addressing the question of the advantages and disadvantages of prenatal prophylactic iron. The results of studies from non-malarial areas<sup>15-21</sup>, although of better quality, may not be relevant due to different settings.<sup>15-21</sup> Although, results were also conflicting in a number of outcomes, the main findings included slightly longer birth length, longer gestational age, and reduced risk of preterm delivery, intrapartum hemorrhage, low birth weight, and infant and child mortality in the iron-folic acid group ~~(Nwaru et al Submitted).~~<sup>22</sup>



1  
2  
3  
4  
5  
6  
7  
8  
9 This limited evidence and the importance of iron prophylaxis in prenatal programs call for further  
10 investigation on the benefits of prenatal iron supplementation in areas of endemic malaria and high  
11 prevalence of HIV. Using a pragmatic randomized controlled trial, we investigated the effects of  
12 routine iron prophylaxis throughout pregnancy compared to screening and treatment for anemia on  
13 maternal and child health in Maputo, Mozambique. The present paper presents the pregnancy  
14 results and interim birth results. About 40% of births were missed by the original data collection  
15 method (~~Nwaru et al Submitted~~)<sup>22</sup>, and missing birth data are currently being retrieved with various  
16 complementary methods. The completed birth results will be presented later.  
17  
18  
19  
20  
21  
22  
23

## 24 25 26 **MATERIALS AND METHODS**

### 27 *Study design and population*

28  
29 The details of the PROFEG trial have been described elsewhere (~~Nwaru et al Submitted~~)<sup>22</sup> and only  
30 the main features are given here. The trial was a pragmatic randomized controlled trial to compare  
31 two iron administration policies (routine iron prophylaxis versus screening and treatment for anemia  
32 during pregnancy) on maternal and child health in Maputo, Mozambique. The trial was carried out  
33 in two health centers, [1o de Maio in Maputo City, the capital \(November 2006 - October 2008\) and](#)  
34 [Machava 2, in Maputo Province \(June 2007 - October 2008\), Mozambique. 1o de Maio in Maputo](#)  
35 [City \(the capital\) Machava 2, in Maputo Province, in 2007-2008; †The completion of collection of](#)  
36 birth data continued until 2012. [The health center of Machava 2 in Maputo province is close to](#)  
37 [Maputo city. The population is urban and semi urban and malaria is endemic in both areas. Seasonal](#)  
38 [increase of malaria is usually observed towards the end of the rainy season \(February to April\).](#)<sup>23</sup>  
39  
40  
41  
42  
43  
44  
45  
46  
47  
48  
49  
50  
51  
52  
53  
54  
55  
56  
57  
58  
59  
60

1  
2  
3  
4  
5  
6  
7 In the study area all women are eligible to attend prenatal care. The usual care recommendations at  
8 the time of the trial included daily prophylactic iron-folate supplementation (60 mg+400 µg)  
9 throughout pregnancy; one dose of mebendazole 500 mg for intestinal parasite; three doses of  
10 sulfadoxine pyrimethamine for malaria prophylaxis (started around 20 weeks gestation, or when  
11 quickenings occur, or when the foetal heart is heard); hemoglobin measurement (Lovibond® is  
12 routinely used) and syphilis screening at the first prenatal visit; and three doses of tetanus vaccine  
13 (at the 5<sup>th</sup> and 7<sup>th</sup> month and at delivery). If malaria was suspected during prenatal consultations, it  
14 was diagnosed by laboratory tests and clinical signs. In most health centers, including our study  
15 centers, HIV testing was offered.<sup>22</sup> Antiretroviral (ARV) drugs were provided by various  
16 international organizations, but we do not have information of how many women received treatment  
17 during pregnancy. The recommendation was to give ARV (Nevirapine) at delivery to prevent  
18 mother-child transmission. Women in Mozambique were given ARVs (Nevirapine) by the health  
19 centers linked with prenatal care prevention for mother to child transmission at labor and after  
20 delivery. We had no information if the women received ARV for their own illness, because at the  
21 time of the trial ARVs in Maputo were administered by different centers and not by the normal  
22 health centers.

Formatted: Font: Times New Roman, 12 pt

Formatted: Font: Times New Roman, 12 pt

Formatted: Space After: 10 pt

### **Recruitment of study participants**

23  
24  
25  
26  
27  
28  
29  
30  
31  
32  
33  
34  
35  
36  
37  
38  
39  
40  
41  
42  
43 Pregnant women attending their first prenatal visit were the target group. During the routine early  
44 morning health education sessions, all women who came for their first prenatal visit were given  
45 general information about the study. Recruitment into the study occurred during individual  
46 consultations and was carried out by study nurses who were employed and trained by the project.  
47  
48  
49  
50  
51 They carried a recruitment book in which they entered the information of the recruited women. In

1  
2  
3  
4  
5  
6  
7 1° de Maio health center, the women visited the study nurses after their routine prenatal care  
8 consultations with the maternal and child health (MCH) nurses. In Machava, the study nurse and the  
9 routine MCH nurse saw the women in the same room. The study nurses checked for women's  
10 eligibility to participate in the study. ~~All pregnant women attending their first prenatal visit were the~~  
11 ~~target group.~~The exclusion criteria were: ~~woman missed attending a visit with the study nurses; too~~  
12 ~~early in pregnancy (< 12 weeks); women~~ with high obstetric risk; and ~~those~~ aged less than 18  
13 years. ~~If eligible,~~ the nurses asked the women to join the study ~~if they did not meet any of the~~  
14 ~~exclusion criteria.~~ Oral and written informed consent was obtained. Three types of women were  
15 missed from the study: women whom MCH nurses sent back home because of too early pregnancy,  
16 women who did not go to the study nurse, and women who refused the study.  
17  
18  
19  
20  
21  
22  
23  
24  
25  
26  
27  
28  
29  
30  
31

### 32 **Randomization**

33 The ~~participating~~ women were randomized into either the Routine iron group (i.e., routine iron  
34 prophylaxis from the first to the last prenatal visit) or the Selective iron group group (i.e. regular  
35 screening for hemoglobin level and treatment for anemia). ~~Researchers (OA) used t~~Researcher  
36 (OA) use the STATA statistical software (StataCorp LP, Texas, USA) was used to generate  
37 sequential random numbers separately for the two centers and the women were assigned to either of  
38 the groups with a probability of 50%. The codes for the groups were put into sealed and numbered  
39 opaque envelopes; the number was the woman's study number and was repeated in the documents  
40 in the envelope. The envelope contained a study identification card (yellow for the Routine iron  
41 group and pink for the Selective, 10 x 20cm) and the informed consent form.  
42  
43  
44  
45  
46  
47  
48  
49  
50  
51

### 52 **Sample size**

1  
2  
3  
4  
5  
6  
7 We did not have up-to-date reliable baseline data of pregnant women's and newborns' health in  
8 Maputo before or of the effects of iron on pregnancy and birth outcomes. Because of lack of prior  
9 reliable data on the baseline rates of the impact of iron, Thus , we used different estimates of the  
10 baseline values for preterm delivery, low birth weight, clinical malaria, and perinatal mortality to  
11 calculate the sample size was calculated with various assumptions of the base line rates, with power  
12 (85% and 90%), significance level of 5%, and the size of the difference to be detected (20% and  
13 30%) for pre term delivery, low birth weight, clinical malaria, and perinatal mortality. Based on  
14 these calculations and the expected feasibility, we decided a target we decided a sample size of  
15 2000 women in each of the two groups to be enough to measure showed to be the safe and could  
16 provide clinically meaningful effects. The STATA statistical software was used to estimate the  
17 sample size.  
18  
19  
20  
21  
22  
23  
24  
25  
26  
27  
28  
29  
30  
31  
32

### 33 *Interventions*

34  
35 On each prenatal visit, Wwomen in the Routine iron group received 30 tablets (supply of one  
36 month) of 60 mg ferrous sulphate plus 400 µg of folic acid per day combined in one tablet. In the  
37 Selective group, women's hemoglobin levels were measured at each visit by the study nurses using  
38 a rapid hemoglobin measure, HemoCue® Hb 201+, (Hemocue AB, Ängelholm, Sweden). If the  
39 hemoglobin was 9g/dl or more, they received 30 tablets of 1 mg of folic acid per day. If their  
40 hemoglobin was below the cut-off of <9g/dl Hb, they received a monthly double dose of iron (60  
41 mg + 60 mg) for the treatment of anemia. Women in the Selective iron were given 30 tablets of 1  
42 mg of folic acid per day. Folic acid 1 mg tablets were used because at the time of the trial pure folic  
43 acid was not licensed in Mozambique in 400 µg tablets. In the Selective group, at each visit, the  
44 nurses measured the hemoglobin using a rapid hemoglobin measure, HemoCue® Hb 201+,  
45  
46  
47  
48  
49  
50  
51  
52  
53  
54

1  
2  
3  
4  
5  
6  
7 ~~(Hemoecue AB, Ängelholm, Sweden). If their hemoglobin was below the cut off of <9g/l Hb, they~~  
8 ~~received a monthly double dose of iron (60 mg + 60 mg) for the treatment of anemia.~~ The tablets  
9  
10 were given in a plastic bag having the drug's name and dosage on it.  
11  
12

### 13 14 **Data collection and follow-up**

15  
16 Data were collected on standard study data forms by three methods: 1) study nurses abstracted  
17 prenatal data from mothers' maternity cards, 2) study nurses asked women additional questions at  
18 the time of the prenatal visits, and 3) study nurses or researchers afterwards collected birth data  
19 from hospital birth records. Delivery nurses were informed of the study and asked to put the  
20 delivery cards into a separate study box. The study women were to be identified by the color of the  
21 identification card stapled to their maternity card. However, this did not succeed very well. By  
22 excluding estimated late miscarriages (5%), early stillbirths (3 %) and home births (10%), we  
23 should have received delivery data for 3547 women (82%) of the 4326 women who participated in  
24 the trial. We received birth data for only 2258 (64% of the estimated 3547) women.  
25  
26  
27  
28  
29  
30  
31  
32  
33

### 34 35 **Outcome measures**

36  
37 The primary outcomes were preterm delivery (delivery <37 weeks of gestation and low birth weight  
38 (<2500 grams); data on weight came from the birth records; for gestation weeks various routine  
39 data sources were used (see below). Originally, we had malaria activation as a primary outcome, but  
40 the pilot showed that it was not feasible. Secondary outcomes were perinatal mortality (as available  
41 from our data collection forms; unlikely to cover early stillbirths or neonatal deaths occurring at  
42 home); complications during pregnancy and labor; symptoms suggestive of malaria (fever,  
43 headache, cold/chills, nausea/vomiting, and body aches); and self-reported malaria during  
44 pregnancy (the woman was asked for diagnosed malaria since her last visit).  
45  
46  
47  
48  
49  
50  
51  
52  
53  
54  
55  
56  
57  
58  
59  
60

### *Calculation of gestational age weeks at birth*

In the prenatal visits routine MCH nurses determined gestational weeks in various ways, even though all information ways were not systematically given noted down. In the first prenatal visits, the date of last menstrual period, uterine fundal height, assumed date of delivery and length of gestation (best estimate) were noted. The study nurses abstracted all this information and the best estimate was used in this paper. In birth records, the last menstrual period, date of fertilization, assumed date of fertilization, and length of gestation were to be given by delivery nurses. However, these data were very poorly filled and only 681 (30%) of the women with delivery data had their gestational age weeks recorded at birth. Thus the gestational age weeks for women without that information was estimated from dates using the following algorithm: gestational age weeks at first visit in days + days between the first visit and delivery; the days were then transformed into weeks. For some women (n = 196), the date of delivery was not available. In these cases, date of discharge from the hospital after delivery (minus the length of stay at the hospital) (n = 22) or the date of admission to the hospital (n = 60 women who did not have the date of discharge) was used.

### *Adherence*

The women were instructed and encouraged at each visit to take the tablets they were given. Women allocated to the Routine iron group could refuse to take the iron tablets and they were classified as non-compliant with the intervention. Women who belonged in the Selective iron group and who wanted iron (even if their hemoglobin level was not below the cut-off level) were given iron; they were classified as non-compliant with the intervention. The following questions were asked on each visit: "Was hemoglobin measured?"; "Was iron/folic acid given to the woman?"; "Number of iron/folic acid tablets given?"; "Did the woman take the tablets during the past week?" At each subsequent visit, almost all of the Selective iron women (98%) were measured for

1  
2  
3  
4  
5  
6  
7 hemoglobin using the recommended HemoCue® method and the same proportion of women in the  
8  
9 Routine iron group were given iron tablets at each subsequent visit.

### 10 11 12 ***Ethical approval***

13  
14 Ethical approval for the study was obtained from the Mozambique Ministry of Health Ethics  
15  
16 Committee (CNBS [Ref. 84/CNBS/06]). A positive statement was obtained from the National  
17  
18 Research and Development Centre for Welfare and Health (STAKES) (now the National Institute  
19  
20 for Health and Welfare), Helsinki, Finland (Dno 2571/501/2007). The trial is registered at  
21  
22 ClinicalTrials.gov, number NCT00488579.  
23

### 24 25 26 ***Statistical analysis***

27  
28 All analyses were done on an intention-to-treat basis. Twin pregnancies ( $n = 48$  pairs) were  
29  
30 included in the analysis because their numbers were similar in the two groups and their exclusion  
31  
32 did not alter the results. For pregnancy outcomes, all women ( $n = 4326$ ), and for birth outcomes,  
33  
34 women with birth data ( $n = 2258$ ) were included. Differences in health indicators (fever, headache,  
35  
36 cold/chills, nausea/vomiting, body aches, malaria) between the two iron groups at each subsequent  
37  
38 visit (up to the 5<sup>th</sup> visit) during pregnancy were analyzed by using binomial generalized estimating  
39  
40 equations (GEE) with an exchangeable correlation structure. GEE takes into account the within  
41  
42 person correlation in the setting of repeated measures.

43  
44  
45 Differences in continuously distributed birth outcomes (birth weight, duration of gestation, length of  
46  
47 hospital stay) were analyzed by using the two sample Student's  $t$ -test. Categorical outcomes were  
48  
49 analyzed by using Pearson Chi-square test or Fisher's exact test (in the case of cells with less than 5  
50  
51 cases). To estimate the risk ratios of the effect of iron, the binary birth outcomes (low birth weight  
52  
53 [ $< 2500$  g], preterm birth [ $< 37$  weeks], cesarean section delivery, child and maternal ill-health or

1  
2  
3  
4  
5  
6  
7 death at birth, negative fetal heart beat, delivery in a reference health center, long hospital stay after  
8 birth [ $\geq 2$  days], and unavailability of delivery data) were analyzed by generalized linear models.  
9 The result estimates are presented with 95% confidence intervals (95% CI). Statistical significance  
10 was set at  $P < 0.05$ . STATA 11 statistical software was used for the analyses.  
11  
12  
13

## 14 15 16 **RESULTS**

17  
18 Of the 4326 women recruited to the trial, 2184 were randomly allocated to the Routine iron group  
19 and 2142 to the Selective iron group (Figure 1). The total number of prenatal visits varied but the  
20 maximum number of visits was seven. The number of follow-up visits was similar in the two  
21 groups (Figure 1). About 40% of delivery data were missed when using the original data collection  
22 method and the interim birth data were available for 1109 (51%) in the Routine iron group and for  
23 1149 (54% of women) in the Selective.  
24  
25  
26  
27  
28  
29

30  
31 Table 1 compares maternal background characteristics between the groups by the availability of  
32 birth data. Mean hemoglobin for the Selective group was similar between those with and without  
33 delivery data. The occurrence of symptoms suggestive of malaria (fever, headache, cold/chills,  
34 nausea/vomiting, and body aches) and self-reported malaria during the current pregnancy prior to  
35 the first prenatal visit were similar between the Routine and Selective iron groups. The women in  
36 the two groups with and without birth data were comparable.  
37  
38  
39  
40  
41  
42

43  
44 Between the first and fifth visits, the two groups were similar regarding the occurrence of fever,  
45 headache, cold/chills, nausea/vomiting, and body aches (Table 2). There was a suggestion of  
46 increased incidence of self-reported malaria during pregnancy (odds ratio 1.37, 95% confidence  
47 interval 0.98-1.92) in the Routine iron group (Table 2). Table 2 presents the data for the second and  
48 third follow-up visits, but this was the case also in subsequent visits (data not shown).  
49  
50  
51  
52  
53



1  
2  
3  
4  
5  
6  
7  
8  
9 Tables 3 presents the distribution of birth data by intervention group and Table 4 gives the estimates  
10 of the effect sizes on the birth outcomes. The birth outcomes were similar in the two groups.  
11 However, there was a suggestion (statistically non-significant) that the Routine iron group had  
12 worse outcomes in regard to babies with negative heartbeat at admission, and longer mother's  
13 hospital stay after birth (Table 3). The effect of iron on the primary outcomes was similar in the two  
14 groups. The groups were also relatively similar concerning most other outcomes. However, there  
15 was a suggestion of more babies with negative fetal heartbeat at admission, longer mother's hospital  
16 stay after birth and unavailability of delivery data in the Routine iron group (Table 4). By excluding  
17 births by cesarean section, the estimates for longer mother's hospital stay remained the same (data  
18 not shown).  
19  
20  
21  
22  
23  
24  
25  
26  
27  
28

## 29 **DISCUSSION**

30  
31 The results from this trial indicate that routine iron prophylaxis during pregnancy was not  
32 advantageous over the policy of screening and treatment for anemia with regard to pregnancy and  
33 birth outcomes. If anything, screening and treatment for anemia appeared to be better. Among all  
34 the trial women there was a suggestion of an increased risk of self-reported malaria during  
35 pregnancy seen in the Routine iron group. The interim birth data suggested longer hospital stay after  
36 birth and higher risk of negative fetal heart beat in the Routine iron group. However, all these  
37 differences were statistically non-significant and the complete birth data are needed to conclude any  
38 putative effects of iron on birth outcomes.  
39  
40  
41  
42  
43  
44  
45  
46  
47  
48  
49

50 One of the strengths of our trial is its large sample. So far, this represents the largest trial  
51 investigating the benefits of prophylactic iron during pregnancy on maternal and child health in  
52  
53

1  
2  
3  
4  
5  
6  
7 malaria-endemic settings. The compliance of the study nurses with the trial protocol and that of the  
8 women with regards to uptake of the iron and folic acid tablets was good, as was the follow-up  
9 during pregnancy ~~(Nwaru et al Submitted)~~.<sup>22</sup> However, during pregnancy, we lacked objective  
10 measures of malaria; hence, our results may not reflect the putative effect of iron on clinical  
11 malaria. The collection of delivery data was challenging, resulting in up to an estimated 40% of  
12 missing birth data. We did not realize the extent of the problem until most deliveries had occurred.  
13 We are currently tracing the birth data using various methods (abstracting hospital records and  
14 death register data and calling women), with results to be reported separately after finalization.  
15  
16  
17  
18  
19  
20  
21  
22  
23  
24

25 A comparison of our findings with previous studies conducted in malaria endemic areas is  
26 problematic because of key differences: the previous studies have compared iron versus no iron and  
27 our study compares two policies of iron administration: routine prophylaxis versus screening and  
28 treatment. Nevertheless, the studies from Nigeria<sup>11</sup> and The Gambia<sup>12</sup> found no significant effect of  
29 iron prophylaxis on malaria; they had used a more reliable measure of malaria (clinical and  
30 parasitological analysis). A Ugandan study<sup>14</sup> did not observe any effect of iron supplementation on  
31 the incidence of congenital malaria in the offspring. A Bangladeshi study<sup>10</sup> found a difference in  
32 preterm delivery (less in the non-iron group), but no association was seen with other outcomes  
33 examined, similar to the Nigerian study<sup>11</sup>, including abortion, hypertension, eclampsia, postnatal  
34 complications, birth weight, Apgar scores, prematurity, development of diarrhea at 6 weeks, and  
35 perinatal mortality. Other benefits reported with iron prophylaxis include increased mean birth  
36 weight<sup>12,14</sup>, reduced incidence of prematurity<sup>12</sup>, and increased birth length and Apgar score.<sup>13</sup>  
37  
38  
39  
40  
41  
42  
43  
44  
45  
46  
47  
48  
49  
50  
51  
52  
53  
54  
55  
56  
57  
58  
59  
60

1  
2  
3  
4  
5  
6  
7 Although more complete birth data are needed to reach firm conclusions, we can speculate that the  
8 potential for higher incidence of unavailable delivery data in the Routine iron group may indicate  
9 that these women had more adverse outcomes, such as miscarriage and stillbirths, and consequently  
10 did not deliver in the expected health centers. Similarly, the higher likelihood of longer mother's  
11 hospital stay after birth in the Routine iron group may also be indicative of more problems at birth.  
12 Delivery by cesarean section did not explain the longer hospital stay as the estimate remained the  
13 same after excluding the births that occurred by cesarean section.  
14  
15  
16  
17  
18  
19

20  
21  
22  
23 Anemia has been associated with maternal and child health risks<sup>224-264</sup>, and the association between  
24 iron and increased risk of infections<sup>5-7</sup> calls for more definitive evidence on the benefits of iron  
25 prophylaxis during pregnancy in settings with increased infectious diseases where infections remain  
26 a major cause of maternal and child mortality.<sup>8,9</sup> Our trial in Maputo, Mozambique, is an attempt to  
27 investigate whether routine iron prophylaxis during pregnancy is more effective than screening and  
28 treatment for anemia in improving maternal and child health in an area of endemic malaria and  
29 HIV.  
30  
31  
32  
33  
34  
35  
36  
37  
38  
39

## 40 CONCLUSIONS

41  
42 These interim results from this pragmatic randomized controlled trial indicate that routine iron  
43 prophylaxis during pregnancy did not suggest better maternal and child health outcomes than the  
44 policy of screening and treatment for anemia. If anything, screening and treatment for anemia  
45 appeared to be better. The complete birth data are needed for a firm conclusion. Which of the two  
46 methods, Routine or Selective iron prophylaxis, is more feasible, will be discussed in later  
47 publications.  
48  
49  
50  
51  
52  
53

1  
2  
3  
4  
5  
6  
7  
8  
9  
10  
11  
12  
13  
14  
15  
16  
17  
18  
19  
20  
21  
22  
23  
24  
25  
26  
27  
28  
29  
30  
31  
32  
33  
34  
35  
36  
37  
38  
39  
40  
41  
42  
43  
44  
45  
46  
47  
48  
49  
50  
51  
52  
53  
54  
55  
56  
57  
58  
59  
60

## ACKNOWLEDGMENTS

The study was funded by two grants from the Academy of Finland (2004: 210631; 2010: 139191).

## AUTHORS' CONTRIBUTION

Designed, analyzed, and wrote the paper (BIN, EH, ER, and SP). Designed and responsible for the conception of the PROFEG Trial (EH). Participated in the planning of the PROFEG Trial and made substantial contribution in its execution and participated in interpretation of results and critically reviewing the manuscript (BC, CS, EH, FA, GS, JC, MD, MN, OA, SP). Responsible for data preparation and cleaning (ER, OA).

## COMPETING INTEREST

None declared.

## DATA SHARING

Statistical codes and dataset are available from the corresponding author [bright.nwaru@uta.fi](mailto:bright.nwaru@uta.fi).

Informed consent was not obtained for data sharing but the presented data are anonymised and risk of identification is low.

## REFERENCES

1. Peña-Rosas JP, Viteri FE. Effects and safety of preventive oral iron or iron+folic acid supplementation for women during pregnancy. *Cochrane Database of Systematic Reviews* 2009, Issue 4, art. No.: CD004736.
2. Villar J, Meriardi M, Gulmezoglu AM, Abalos E, Carroli G, Kulier R, et al. Nutritional interventions during pregnancy for the prevention or treatment of maternal mortality and preterm delivery: an overview of randomized controlled trials. *J Nutr* 2003; 133:1606-25.
3. Lao TT, Tam KF, Chan LY. Third trimester iron status and pregnancy outcome in non-anaemic women: pregnancy unfavourably affected by maternal iron excess. *Hum Reprod* 2000; 15: 1843-48.
4. Yip R. Significance of an abnormally low or high hemoglobin concentration during pregnancy: special consideration of iron nutrition. *Am J Clin Nutr* 2000 72: 272S-9S.
5. Oppenheimer SJ. Iron and its relation to immunity and infectious disease. *J Nutr* 2001; 131: 616S-35S.
6. Prentice AM. Iron metabolism, malaria, and other infections: what is all the fuss about? *J Nutr* 2008; 138: 2537-41.
7. Gera T, Sachdev HP. Effect of iron supplementation on incidence of infectious illness in children: systematic review. *BMJ* 2002; 325: 1142.
8. Lawn JE, Cousens S, Zupan J, Lancet Neonatal Survival Steering Team. 4 million neonatal deaths: When? Where? Why? *Lancet* 2005; 365: 891-900.
9. Idemyor V. Human Immunodeficiency Virus (HIV) and Malaria Interaction in Sub-Saharan Africa: The Collision of Two Titans. *HIV Clin Trials* 2007; 8: 246-53.

- 1  
2  
3  
4  
5  
6  
7 10. Juncker T, Ameer S, Mmaum A, et al. A trial of iron and folate supplementation during  
8 pregnancy in Bangladesh. Abstract presented at the American Public Health Association,  
9 2001, Atlanta, USA.
- 10  
11  
12 11. Fleming AF, Ghatoura GB, Harrison KA, Briggs ND, Dunn DT. The prevention of anaemia  
13 in pregnancy in primigravidae in the guinea savanna of Nigeria. *Ann Trop Med Parasitol*  
14 1986; 80: 211-33.
- 15  
16  
17 12. Menendez C, Todd J, Alonso PL, Francis N, Lulat S, Ceesay S, et al The effects of iron  
18 supplementation during pregnancy, given by traditional birth attendants, on the prevalence  
19 of anaemia and malaria. *Trans R Soc Trop Med Hyg* 1994; 88: 590-3.
- 20  
21  
22 13. Preziosi P, Prual A, Galan P, Daouda H, Boureima H, Hercberg S. Effect of iron  
23 supplementation on the iron status of pregnant women: consequences for newborns. *Am J*  
24 *Clin Nutr* 1997; 66: 1178-82.
- 25  
26  
27 14. Ndyomugenyi R, Magnussen P. Chloroquine prophylaxis, iron/folic-acid supplementation  
28 or case management of malaria attacks in primigravidae in western Uganda: effects on  
29 congenital malaria and infant haemoglobin concentrations. *Ann Trop Med Parasitol* 2000;  
30 94: 759-70.
- 31  
32  
33 15. Christian P, Khattry SK, Katz J, Pradhan EK, LeClerg SC, Shrestha SR, et al. Effects of  
34 alternative maternal micronutrient supplements on low birth weight in rural Nepal: a double  
35 blind randomized community trial. *BMJ* 2003; 326: 571.
- 36  
37  
38 16. Christian P, West KP, Khattry SK, LeClerg SC, Pradhan EK, Katz J, et al. Effects of  
39 maternal micronutrient supplementation on fetal loss and infant mortality: a cluster-  
40 randomized trial in Nepal. *Am J Clin Nutr* 2003; 78: 1194-1202.
- 41  
42  
43 17. Christian P, Darmstadt GL, Wu L, Khattry SK, LeClerg SC, Katz J, et al The effect of  
44 maternal micronutrient supplementation on early neonatal morbidity in rural Nepal: a  
45 randomized, control, community trial. *Arch Dis Child* 2008; 93: 660-4.

- 1  
2  
3  
4  
5  
6  
7 18. Christian P, Khattry SK, LeClerq SC, Dali SM. Effects of prenatal micronutrient  
8 supplementation on complications of labor and delivery and puerperal morbidity in rural  
9 Nepal. *Int J Gynaecol Obstet* 2009; 106: 3-7.
- 10  
11  
12 19. Christian P, Stewart CP, LeClerq SC, Wu L, Katz J, West KP Jr, et al. Antenatal and  
13 postnatal iron supplementation and childhood mortality in rural Neap: a prospective follow-  
14 up in a randomized, controlled community trial. *Am J Epidemiol* 2009; 170: 1127-36.
- 15  
16  
17 20. Christian P, Murray-Kolb LE, Khattry SK, Katz J, Schaefer BA, Cole PM, et al. Prenatal  
18 micronutrient supplementation and intellectual and motor function in early school-aged  
19 children in Nepal. *JAMA* 2010; 304: 2716-23.
- 20  
21  
22 [21. Zeng L, Dibley MJ, Cheng Y, Dang S, Chang S, Kong L, et al. Impact of micronutrient  
23 supplementation during pregnancy on birth weight, duration of gestation, and perinatal  
24 mortality in rural western China: double blind cluster randomized controlled trial. \*BMJ\*  
25 2008; 337: a2001.](#)
- 26  
27  
28 [22. Nwaru BI, Parkkali S, Abacassamo F, Salomé G, Chilundo B, Augusto O, et al. A pragmatic  
29 randomised controlled trial on routine iron prophylaxis during pregnancy in Maputo,  
30 Mozambique \(PROFEG\): rationale, design, and success. \*Matern Child Nutr\*. In press.](#)
- 31  
32  
33 [23-24. Dgedge M. Implementation of an insecticide Bednet programme for malaria  
34 prevention through the primary health care system in Mozambique. Doctoral thesis. London  
35 School of Hygiene and Tropical Medicine, 2000.](#)
- 36  
37  
38 [22-24. Müngen E. Iron supplementation in pregnancy. \*J Perinat. Med\* 2003; 31: 420-6.](#)
- 39  
40  
41 [23-25. Brabin BJ, Hakimi M, Pelletier D. An analysis of anemia and pregnancy-related  
42 maternal mortality. \*J Nutr\*. 2001; 131\(suppl\): 604S-15S.](#)
- 43  
44  
45  
46  
47  
48  
49 [24-26. Stoltzfus RJ, Mullanny L, Black RE. Iron deficiency anaemia. In: Ezzati M, Lopez  
50 AD, Rodgers A. et al, eds. Comparative Quantification of Health Risks: Global and  
51  
52  
53  
54  
55  
56  
57  
58  
59  
60](#)

1  
2  
3  
4  
5  
6  
7  
8  
9  
10  
11  
12  
13  
14  
15  
16  
17  
18  
19  
20  
21  
22  
23  
24  
25  
26  
27  
28  
29  
30  
31  
32  
33  
34  
35  
36  
37  
38  
39  
40  
41  
42  
43  
44  
45  
46  
47  
48  
49  
50  
51  
52  
53  
54  
55  
56  
57  
58  
59  
60

Regional Burden of Disease Attributable to Selected Major Risk Factors. Vol 1. Geneva, Switzerland: World Health Organization; 2004: 163-209.

For peer review only



Table 1. Characteristics of women at recruitment by availability of delivery data and group allocation, proportions % (numbers)

| Characteristics                          | Delivery data, <i>N</i> = 2258 |                | No delivery data, <i>N</i> = 2068 |                |
|------------------------------------------|--------------------------------|----------------|-----------------------------------|----------------|
|                                          | Selective iron                 | Routine iron   | Selective iron                    | Routine iron   |
|                                          | (1149)                         | (1109)         | (993)                             | (1075)         |
|                                          | % ( <i>n</i> )                 | % ( <i>n</i> ) | % ( <i>n</i> )                    | % ( <i>n</i> ) |
| Maternal age, mean (SD) years            | 24.6 (5.4)                     | 24.7 (5.3)     | 25.0 (5.6)                        | 24.6 (5.6)     |
| Maternal age (categorized)               |                                |                |                                   |                |
| < 20 years                               | 17.5 (201)                     | 16.5 (183)     | 15.7 (156)                        | 19.3 (207)     |
| 20-24 years                              | 41.1 (472)                     | 39.9 (443)     | 39.0 (387)                        | 37.1 (399)     |
| 25-29 years                              | 23.1 (265)                     | 23.3 (258)     | 23.9 (237)                        | 23.4 (252)     |
| 30-34 years                              | 11.3 (130)                     | 13.8 (153)     | 12.9 (128)                        | 13.3 (143)     |
| ≥ 35 years                               | 6.3 (72)                       | 5.6 (62)       | 7.4 (74)                          | 6.5 (70)       |
| Missing                                  | 0.8 (9)                        | 0.9 (10)       | 1.1 (11)                          | 0.4 (4)        |
| Hemoglobin by HemoCue® (g/dl), mean (SD) | 9.6 (1.7)                      |                | 9.6 (1.7)                         |                |
| Hemoglobin by HemoCue® (g/dl), n (%)     |                                |                |                                   |                |
| < 7.0                                    | 6.9 (79)                       |                | 6.2 (62)                          |                |
| 7.0-8.90                                 | 24.6 (283)                     |                | 25.4 (252)                        |                |
| 9.0-9.90                                 | 23.5 (270)                     |                | 24.4 (242)                        |                |
| 10.0-10.90                               | 21.9 (252)                     |                | 21.1 (210)                        |                |
| 11.0-11.90                               | 14.1 (162)                     |                | 13.7 (136)                        |                |
| ≥ 12.0                                   | 7.9 (91)                       |                | 8.4 (83)                          |                |
| Not measured                             | 1.0 (12)                       |                | 0.8 (8)                           |                |
| Previous abortions                       |                                |                |                                   |                |
| No                                       | 87.6 (1007)                    | 86.8 (963)     | 86.0 (854)                        | 85.4 (918)     |
| Yes                                      | 12.1 (139)                     | 12.8 (142)     | 13.6 (135)                        | 14.5 (156)     |
| Missing                                  | 0.3 (3)                        | 0.4 (4)        | 0.4 (4)                           | 0.1 (1)        |
| Gestational age, mean (SD) weeks         | 21.6 (5.9)                     | 21.7 (5.6)     | 21.0 (5.9)                        | 21.3 (5.8)     |

## Gestational age (categorized)

|                |            |            |            |            |
|----------------|------------|------------|------------|------------|
| < 16           | 19.2 (221) | 16.4 (182) | 21.5 (213) | 20.1 (216) |
| 17-20          | 21.8 (250) | 24.2 (268) | 22.5 (223) | 21.7 (233) |
| 21-26          | 34.3 (394) | 32.6 (361) | 31.3 (311) | 33.7 (362) |
| > 27           | 19.7 (226) | 19.7 (219) | 17.5 (174) | 18.2 (196) |
| No information | 58 (5.0)   | 7.1 (79)   | 7.3 (72)   | 6.3 (68)   |

## Previous stillbirths

|         |             |             |            |            |
|---------|-------------|-------------|------------|------------|
| No      | 91.5 (1052) | 92.3 (1024) | 91.6 (910) | 91.0 (978) |
| Yes     | 8.2 (94)    | 7.2 (80)    | 7.9 (78)   | 8.9 (96)   |
| Missing | 0.3 (3)     | 0.5 (5)     | 0.5 (5)    | 0.1 (1)    |

## Previous deliveries

|               |            |            |            |            |
|---------------|------------|------------|------------|------------|
| None          | 29.7 (341) | 30.3 (336) | 29.2 (290) | 33.8 (363) |
| One           | 31.9 (367) | 31.7 (352) | 30.6 (304) | 28.5 (306) |
| Two           | 19.2 (221) | 17.8 (197) | 17.9 (178) | 18.6 (200) |
| Three or more | 18.8(216)  | 19.8 (220) | 22.0 (218) | 19.0 (205) |
| Missing       | 0.4 (4)    | 0.4 (4)    | 0.3 (3)    | 0.1 (1)    |

## HIV status

|          |            |            |            |            |
|----------|------------|------------|------------|------------|
| Negative | 81.2 (934) | 81.8 (907) | 76.7 (762) | 79.0 (849) |
| Positive | 18.8 (215) | 18.2 (202) | 23.3 (231) | 21.0 (226) |

## Twin pregnancy

|     |             |             |            |             |
|-----|-------------|-------------|------------|-------------|
| No  | 98.7 (1134) | 98.6 (1093) | 99.2 (985) | 99.2 (1066) |
| Yes | 1.3 (15)    | 1.4 (16)    | 0.8 (8)    | 0.8 (9)     |

---

*Symptoms during current pregnancy before first prenatal visit*


---

## Fever

|    |                       |            |            |            |            |
|----|-----------------------|------------|------------|------------|------------|
| 1  |                       |            |            |            |            |
| 2  |                       |            |            |            |            |
| 3  | Yes                   | 22.9 (264) | 24.4 (271) | 28.8 (286) | 23.8 (256) |
| 4  |                       |            |            |            |            |
| 5  | Headache              |            |            |            |            |
| 6  |                       |            |            |            |            |
| 7  | Yes                   | 41.5 (477) | 43.5 (482) | 44.3 (440) | 43.0 (462) |
| 8  |                       |            |            |            |            |
| 9  | Cold/chills           |            |            |            |            |
| 10 |                       |            |            |            |            |
| 11 | Yes                   | 18.0 (207) | 18.4 (204) | 20.6 (205) | 18.8 (202) |
| 12 |                       |            |            |            |            |
| 13 | Vomit/nausea          |            |            |            |            |
| 14 |                       |            |            |            |            |
| 15 | Yes                   | 27.5 (316) | 26.9 (298) | 29.8 (296) | 28.6 (307) |
| 16 |                       |            |            |            |            |
| 17 | Body aches            |            |            |            |            |
| 18 |                       |            |            |            |            |
| 19 | Yes                   | 21.8 (251) | 21.3 (237) | 23.8 (236) | 23.3 (251) |
| 20 |                       |            |            |            |            |
| 21 | Self-reported malaria |            |            |            |            |
| 22 |                       |            |            |            |            |
| 23 | Yes                   | 5.7 (66)   | 6.0 (67)   | 5.9 (59)   | 6.3 (68)   |
| 24 |                       |            |            |            |            |
| 25 | Had malaria test      |            |            |            |            |
| 26 |                       |            |            |            |            |
| 27 | Yes                   | 7.0 (80)   | 7.1 (79)   | 8.0 (79)   | 7.9 (85)   |
| 28 |                       |            |            |            |            |
| 29 |                       |            |            |            |            |
| 30 |                       |            |            |            |            |
| 31 |                       |            |            |            |            |
| 32 |                       |            |            |            |            |
| 33 |                       |            |            |            |            |
| 34 |                       |            |            |            |            |
| 35 |                       |            |            |            |            |
| 36 |                       |            |            |            |            |
| 37 |                       |            |            |            |            |
| 38 |                       |            |            |            |            |
| 39 |                       |            |            |            |            |
| 40 |                       |            |            |            |            |
| 41 |                       |            |            |            |            |
| 42 |                       |            |            |            |            |
| 43 |                       |            |            |            |            |
| 44 |                       |            |            |            |            |
| 45 |                       |            |            |            |            |
| 46 |                       |            |            |            |            |
| 47 |                       |            |            |            |            |
| 48 |                       |            |            |            |            |
| 49 |                       |            |            |            |            |
| 50 |                       |            |            |            |            |
| 51 |                       |            |            |            |            |
| 52 |                       |            |            |            |            |
| 53 |                       |            |            |            |            |
| 54 |                       |            |            |            |            |
| 55 |                       |            |            |            |            |
| 56 |                       |            |            |            |            |
| 57 |                       |            |            |            |            |
| 58 |                       |            |            |            |            |
| 59 |                       |            |            |            |            |
| 60 |                       |            |            |            |            |

Table 2. Proportions (%) of women (numbers) with outcomes suggesting malaria during pregnancy, and odds ratios (OR) and 95% confidence intervals (95% CI) for group effect,  $n = 4326$

| Outcomes              | Second visit <sup>1</sup>         |                                 | Third visit <sup>2</sup>          |                                 | Between the first and fifth visit <sup>3</sup> |                  |                 |
|-----------------------|-----------------------------------|---------------------------------|-----------------------------------|---------------------------------|------------------------------------------------|------------------|-----------------|
|                       | % ( <i>n</i> )                    |                                 | % ( <i>n</i> )                    |                                 | OR (95% CI)                                    |                  |                 |
|                       | Selective iron<br><i>n</i> = 1455 | Routine iron<br><i>n</i> = 1494 | Selective iron<br><i>n</i> = 1040 | Routine iron<br><i>n</i> = 1106 | Selective iron                                 | Routine iron     | <i>P</i> -value |
| Fever                 | 11.5 (168)                        | 10.0 (150)                      | 11.3 (117)                        | 12.1 (134)                      | 1.00                                           | 0.95 (0.81-1.11) | 0.523           |
| Headache              | 24.9 (363)                        | 24.3 (363)                      | 24.9 (259)                        | 25.1 (278)                      | 1.00                                           | 0.98 (0.87-1.10) | 0.738           |
| Cold/chills           | 8.2 (120)                         | 7.0 (104)                       | 6.7 (70)                          | 7.8 (86)                        | 1.00                                           | 0.92 (0.76-1.11) | 0.361           |
| Vomit/nausea          | 9.1 (133)                         | 10.2 (153)                      | 8.5 (88)                          | 9.6 (109)                       | 1.00                                           | 1.09 (0.92-1.31) | 0.323           |
| Body aches            | 10.1 (147)                        | 9.2 (138)                       | 10.9 (113)                        | 9.8 (108)                       | 1.00                                           | 0.89 (0.75-1.06) | 0.180           |
| Self-reported malaria | 2.4 (35)                          | 3.0 (45)                        | 1.5 (16)                          | 2.2 (24)                        | 1.00                                           | 1.37 (0.98-1.92) | 0.068           |

<sup>1</sup>Between first and second visit

<sup>2</sup>Between second and third visit

<sup>3</sup>The effect estimates calculated by binomial generalized estimating equations (with exchangeable correlation structure) to account for the repeated measures of the outcomes.

Table 3. Birth outcomes by group allocation, percentages, % (numbers) of women or babies or means (SD).

| Outcomes                                     | Selective iron<br><i>n</i> = 1149 | Routine iron<br><i>n</i> = 1109 | <i>P</i> -value <sup>1</sup> |
|----------------------------------------------|-----------------------------------|---------------------------------|------------------------------|
| Birth weight, mean (SD) grams                | 2996.3 (508.4)                    | 2989.4 (514.9)                  | 0.752                        |
| Birth weight, % ( <i>n</i> )                 |                                   |                                 | 0.443                        |
| < 2500 g                                     | 11.8 (136)                        | 12.8 (142)                      |                              |
| 2500-2999 g                                  | 30.6 (351)                        | 31.1 (345)                      |                              |
| 3000-3499 g                                  | 40.5 (465)                        | 37.8 (419)                      |                              |
| 3500-3999 g                                  | 12.7 (146)                        | 13.8 (153)                      |                              |
| ≥ 4000 g                                     | 3.0 (34)                          | 2.1 (23)                        |                              |
| No information                               | 1.5 (17)                          | 2.4 (27)                        |                              |
| Duration of gestation, mean (SD) weeks       | 38.3 (4.2)                        | 38.4 (4.0)                      | 0.689                        |
| Duration of gestation, % ( <i>n</i> )        |                                   |                                 | 0.056                        |
| < 37 weeks                                   | 28.8 (331)                        | 27.0 (299)                      |                              |
| ≥ 37 weeks                                   | 67.2 (772)                        | 66.9 (742)                      |                              |
| No information                               | 4.0 (46)                          | 6.1 (68)                        |                              |
| Mode of delivery, % ( <i>n</i> )             |                                   |                                 | 0.235                        |
| Normal                                       | 87.6 (1007)                       | 89.4 (991)                      |                              |
| Cesarean section                             | 1.3 (15)                          | 2.0 (22)                        |                              |
| No information                               | 11.1 (127)                        | 8.7 (96)                        |                              |
| Child health status at birth, % ( <i>n</i> ) |                                   |                                 | 0.685                        |
| Well                                         | 94.0 (1080)                       | 92.1 (1022)                     |                              |
| Ill                                          | 0.7 (8)                           | 1.0 (11)                        |                              |
| Dead                                         | 1.8 (21)                          | 2.0 (22)                        |                              |
| No information                               | 3.5 (40)                          | 5.0 (55)                        |                              |

|                                                     |             |             |       |
|-----------------------------------------------------|-------------|-------------|-------|
| Still birth, % ( <i>n</i> )                         |             |             | 0.558 |
| No                                                  | 81.2 (933)  | 79.7 (884)  |       |
| Yes                                                 | 2.5 (29)    | 2.9 (32)    |       |
| No information                                      | 16.3 (187)  | 17.4 (193)  |       |
| Fetal heart beat at admission, % ( <i>n</i> )       |             |             | 0.085 |
| Negative                                            | 1.6 (18)    | 2.6 (29)    |       |
| Positive                                            | 85.6 (984)  | 85.2 (945)  |       |
| No information                                      | 12.8 (147)  | 12.2 (135)  |       |
| Mother's health status at birth, % ( <i>n</i> )     |             |             | 0.895 |
| Well                                                | 95.6 (1098) | 94.9 (1052) |       |
| Ill                                                 | 0.4 (4)     | 0.4 (4)     |       |
| Dead                                                | 0.1 (1)     | 0.2 (2)     |       |
| No information                                      | 4.0 (46)    | 4.6 (51)    |       |
| Length of hospital stay, mean (SD) days             | 1.33 (1.21) | 1.63 (1.30) | 0.075 |
| Length of hospital stay after birth, % ( <i>n</i> ) |             |             | 0.103 |
| ≤ 1 day                                             | 65.1 (748)  | 60.7 (673)  |       |
| 2 days                                              | 23.5 (270)  | 24.2 (268)  |       |
| ≥ 3 days                                            | 4.0 (46)    | 5.6 (62)    |       |
| No information                                      | 7.4 (85)    | 9.6 (106)   |       |
| Place of delivery, % ( <i>n</i> )                   |             |             | 0.652 |
| Io de Maio (health center)                          | 44.4 (510)  | 42.6 (472)  |       |
| Machava (health center)                             | 35.1 (403)  | 38.2 (424)  |       |
| Jose Macamo (hospital)                              | 3.7 (43)    | 3.6 (40)    |       |
| Mavalane (hospital)                                 | 14.3 (164)  | 12.8 (142)  |       |

|                        |          |          |
|------------------------|----------|----------|
| Central Hospital       | 0.3 (3)  | 0.3 (3)  |
| At home                | 1.1 (13) | 1.3 (14) |
| On the way to hospital | 0.0 (0)  | 0.2 (2)  |
| No information         | 1.1 (13) | 1.1 (12) |

---

<sup>1</sup>Based on T-test for continuous outcomes, Pearson Chi-square test or Fisher's exact test for categorical outcomes. Subjects with no information were not included in the tests.

For peer review only

Table 4. Numbers, proportions (%), and risk ratios (RR, 95% confidence intervals CI) of birth outcomes by iron groups

| Outcomes                                     | Selective iron<br><i>n</i> | Routine iron<br><i>n</i> | Selective iron<br>% | Routine iron<br>% | Selective iron | Routine iron<br>RR (95% CI) <sup>2</sup> | <i>P</i> -value |
|----------------------------------------------|----------------------------|--------------------------|---------------------|-------------------|----------------|------------------------------------------|-----------------|
| <i>Primary health outcomes</i>               |                            |                          |                     |                   |                |                                          |                 |
| Low birth weight (<2500 grams)               | 136                        | 142                      | 11.8                | 12.8              | 1.00           | 1.09 (0.88-1.36)                         | 0.431           |
| Preterm delivery (<37 weeks)                 | 331                        | 299                      | 28.8                | 27.0              | 1.00           | 0.96 (0.84-1.09)                         | 0.185           |
| <i>Secondary health outcomes</i>             |                            |                          |                     |                   |                |                                          |                 |
| Cesarean section delivery                    | 15                         | 22                       | 1.3                 | 2.0               | 1.00           | 1.48 (0.77-2.84)                         | 0.238           |
| Negative fetal heart beat at admission       | 18                         | 29                       | 1.6                 | 2.6               | 1.00           | 1.66 (0.93-2.96)                         | 0.089           |
| Child ill or dead at birth                   | 29                         | 33                       | 2.5                 | 3.0               | 1.00           | 1.20 (0.73-1.96)                         | 0.473           |
| Mother ill or dead at birth                  | 5                          | 6                        | 0.4                 | 0.5               | 1.00           | 1.25 (0.38-4.09)                         | 0.711           |
| <i>Other outcomes</i>                        |                            |                          |                     |                   |                |                                          |                 |
| Delivery in reference center <sup>1</sup>    | 210                        | 185                      | 18.3                | 16.7              | 1.00           | 0.91 (0.76-1.09)                         | 0.316           |
| Long hospital stay after delivery (≥ 3 days) | 46                         | 62                       | 4.0                 | 5.6               | 1.00           | 1.43 (0.97-1.26)                         | 0.059           |
| No delivery data                             | 993                        | 1075                     | 46.4                | 49.2              | 1.00           | 1.06 (1.00-1.13)                         | 0.060           |

<sup>1</sup>Jose Macamo or Mavalane or Central Hospital<sup>2</sup>The estimates were not adjusted for any baseline characteristic because the two groups did not differ from each other at baseline



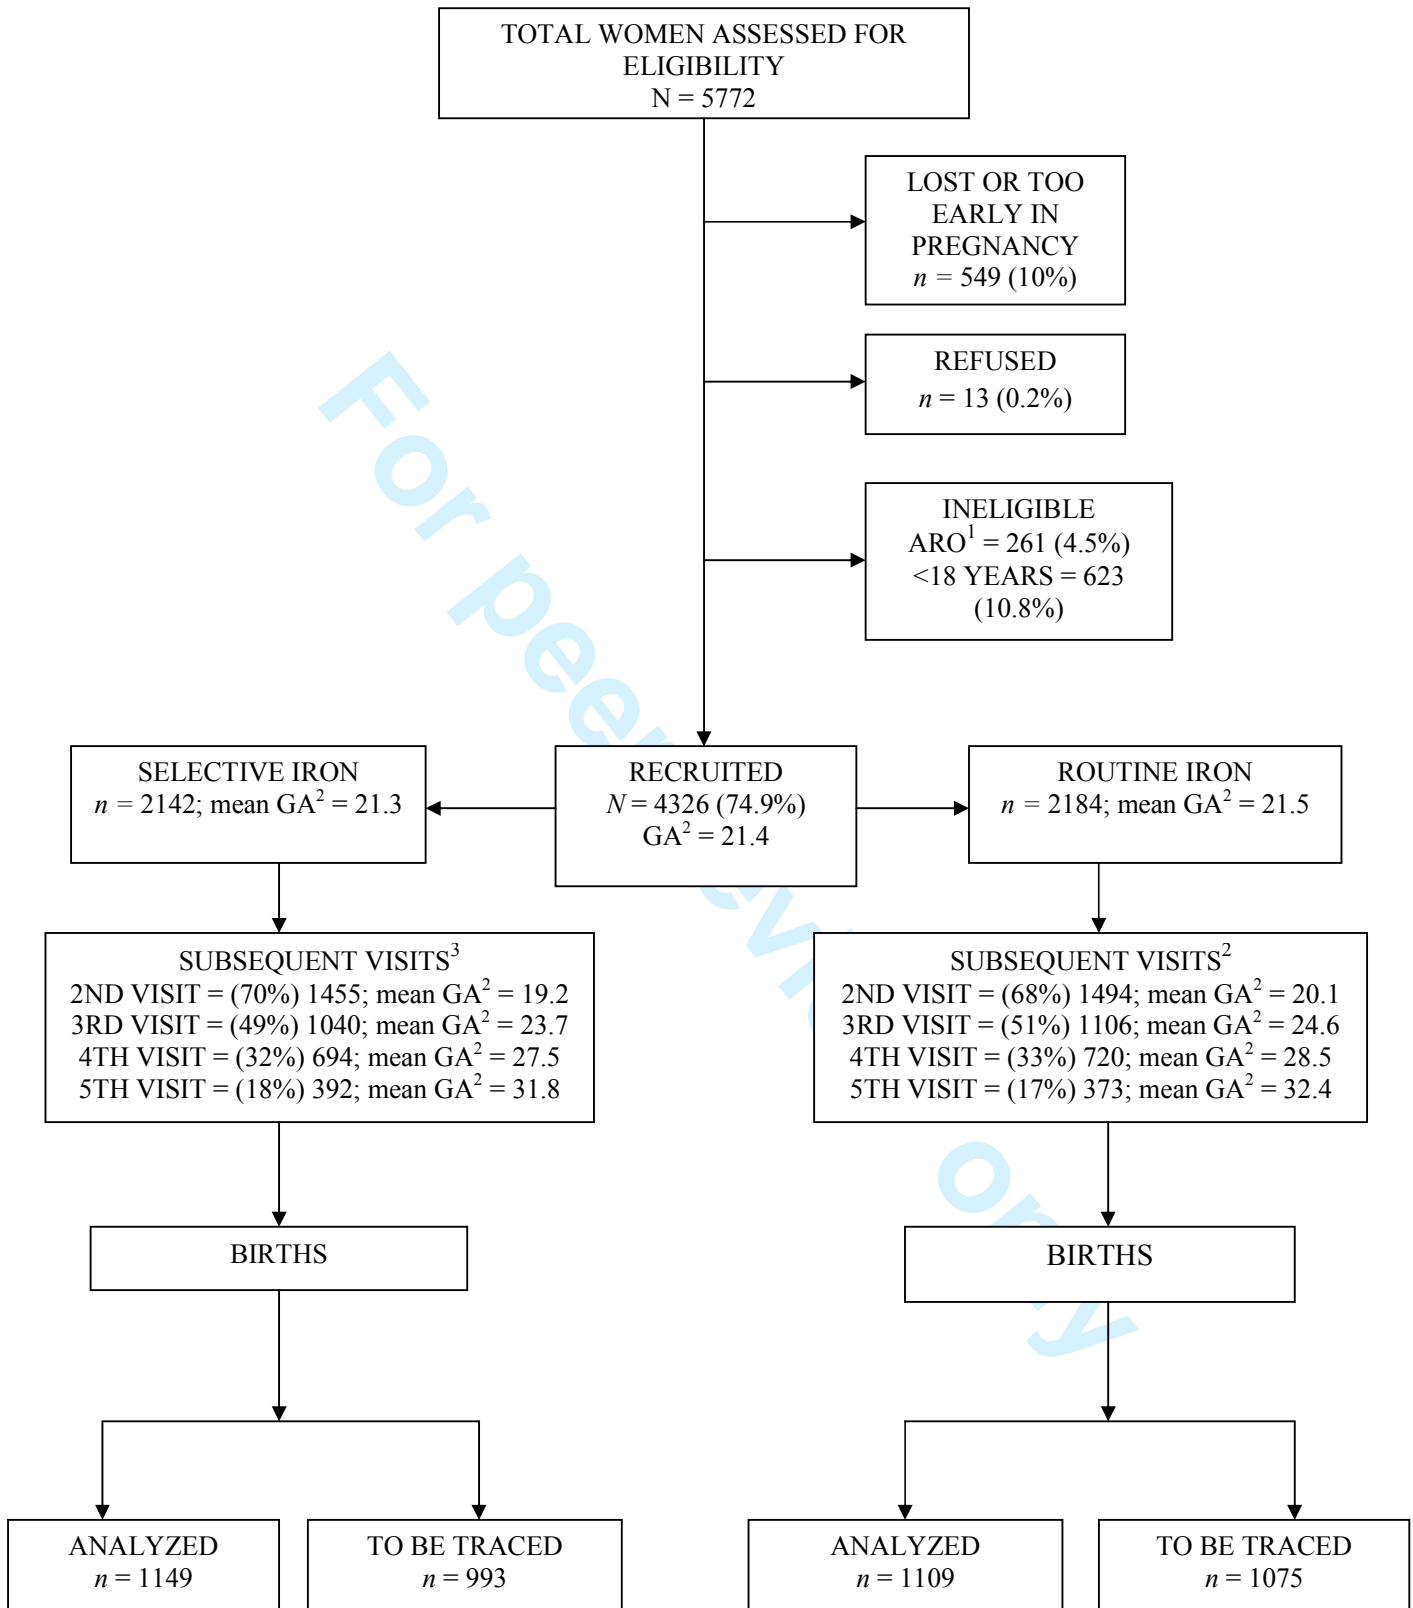

**Figure 1.** PROFEG Trial Flow Diagram

<sup>1</sup>ARO = high risk pregnancy; <sup>2</sup>GA = gestational age in weeks; <sup>3</sup>After recruitment, % were calculated from recruited, n = 4326

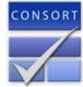

## CONSORT 2010 checklist of information to include when reporting a randomised trial\*

| Section/Topic                    | Item No | Checklist item                                                                                                                                                                              | Reported on page No |
|----------------------------------|---------|---------------------------------------------------------------------------------------------------------------------------------------------------------------------------------------------|---------------------|
| <b>Title and abstract</b>        |         |                                                                                                                                                                                             |                     |
|                                  | 1a      | Identification as a randomised trial in the title                                                                                                                                           | 1                   |
|                                  | 1b      | Structured summary of trial design, methods, results, and conclusions (for specific guidance see CONSORT for abstracts)                                                                     | 2, 3                |
| <b>Introduction</b>              |         |                                                                                                                                                                                             |                     |
| Background and objectives        | 2a      | Scientific background and explanation of rationale                                                                                                                                          | 5,6                 |
|                                  | 2b      | Specific objectives or hypotheses                                                                                                                                                           | 6                   |
| <b>Methods</b>                   |         |                                                                                                                                                                                             |                     |
| Trial design                     | 3a      | Description of trial design (such as parallel, factorial) including allocation ratio                                                                                                        | 6,7                 |
|                                  | 3b      | Important changes to methods after trial commencement (such as eligibility criteria), with reasons                                                                                          | None                |
| Participants                     | 4a      | Eligibility criteria for participants                                                                                                                                                       | 7,8                 |
|                                  | 4b      | Settings and locations where the data were collected                                                                                                                                        | 6,7                 |
| Interventions                    | 5       | The interventions for each group with sufficient details to allow replication, including how and when they were actually administered                                                       | 9,10                |
| Outcomes                         | 6a      | Completely defined pre-specified primary and secondary outcome measures, including how and when they were assessed                                                                          | 10                  |
|                                  | 6b      | Any changes to trial outcomes after the trial commenced, with reasons                                                                                                                       | None                |
| Sample size                      | 7a      | How sample size was determined                                                                                                                                                              | 8,9                 |
|                                  | 7b      | When applicable, explanation of any interim analyses and stopping guidelines                                                                                                                | NA                  |
| <b>Randomisation:</b>            |         |                                                                                                                                                                                             |                     |
| Sequence generation              | 8a      | Method used to generate the random allocation sequence                                                                                                                                      | 8                   |
|                                  | 8b      | Type of randomisation; details of any restriction (such as blocking and block size)                                                                                                         | 8                   |
| Allocation concealment mechanism | 9       | Mechanism used to implement the random allocation sequence (such as sequentially numbered containers), describing any steps taken to conceal the sequence until interventions were assigned | 8                   |
| Implementation                   | 10      | Who generated the random allocation sequence, who enrolled participants, and who assigned participants to interventions                                                                     | 8                   |
| Blinding                         | 11a     | If done, who was blinded after assignment to interventions (for example, participants, care providers, those                                                                                | Not done.           |

|                                                      |     |                                                                                                                                                   |                                           |
|------------------------------------------------------|-----|---------------------------------------------------------------------------------------------------------------------------------------------------|-------------------------------------------|
|                                                      |     | assessing outcomes) and how                                                                                                                       | Pragmatic trial design                    |
|                                                      |     |                                                                                                                                                   | NA                                        |
| Statistical methods                                  | 11b | If relevant, description of the similarity of interventions                                                                                       | 11,12                                     |
|                                                      | 12a | Statistical methods used to compare groups for primary and secondary outcomes                                                                     | Not done                                  |
|                                                      | 12b | Methods for additional analyses, such as subgroup analyses and adjusted analyses                                                                  |                                           |
| <b>Results</b>                                       |     |                                                                                                                                                   |                                           |
| Participant flow (a diagram is strongly recommended) | 13a | For each group, the numbers of participants who were randomly assigned, received intended treatment, and were analysed for the primary outcome    | 13, Figure 1                              |
|                                                      | 13b | For each group, losses and exclusions after randomisation, together with reasons                                                                  | 13, Figure 1                              |
| Recruitment                                          | 14a | Dates defining the periods of recruitment and follow-up                                                                                           | 6,7                                       |
|                                                      | 14b | Why the trial ended or was stopped                                                                                                                | Ended as planned                          |
| Baseline data                                        | 15  | A table showing baseline demographic and clinical characteristics for each group                                                                  | Table 1                                   |
| Numbers analysed                                     | 16  | For each group, number of participants (denominator) included in each analysis and whether the analysis was by original assigned groups           | 13, Tables 2-4                            |
| Outcomes and estimation                              | 17a | For each primary and secondary outcome, results for each group, and the estimated effect size and its precision (such as 95% confidence interval) | 13,14, Tables 2-4                         |
|                                                      | 17b | For binary outcomes, presentation of both absolute and relative effect sizes is recommended                                                       | Table 4                                   |
| Ancillary analyses                                   | 18  | Results of any other analyses performed, including subgroup analyses and adjusted analyses, distinguishing pre-specified from exploratory         | None                                      |
| Harms                                                | 19  | All important harms or unintended effects in each group (for specific guidance see CONSORT for harms)                                             | NA (benefits and harms not distinguished) |
| <b>Discussion</b>                                    |     |                                                                                                                                                   |                                           |
| Limitations                                          | 20  | Trial limitations, addressing sources of potential bias, imprecision, and, if relevant, multiplicity of analyses                                  | 14,15                                     |
| Generalisability                                     | 21  | Generalisability (external validity, applicability) of the trial findings                                                                         | 15                                        |
| Interpretation                                       | 22  | Interpretation consistent with results, balancing benefits and harms, and considering other relevant evidence                                     | 15, 16                                    |
| <b>Other information</b>                             |     |                                                                                                                                                   |                                           |
| Registration                                         | 23  | Registration number and name of trial registry                                                                                                    | 3                                         |
| Protocol                                             | 24  | Where the full trial protocol can be accessed, if available                                                                                       | From Authors                              |
| Funding                                              | 25  | Sources of funding and other support (such as supply of drugs), role of funders                                                                   | 3, 17                                     |

1  
2  
3  
4  
5  
6  
7  
8  
9  
10  
11  
12  
13  
14  
15  
16  
17  
18  
19  
20  
21  
22  
23  
24  
25  
26  
27  
28  
29  
30  
31  
32  
33  
34  
35  
36  
37  
38  
39  
40  
41  
42  
43  
44  
45  
46  
47  
48  
49

\*We strongly recommend reading this statement in conjunction with the CONSORT 2010 Explanation and Elaboration for important clarifications on all the items. If relevant, we also recommend reading CONSORT extensions for cluster randomised trials, non-inferiority and equivalence trials, non-pharmacological treatments, herbal interventions, and pragmatic trials. Additional extensions are forthcoming: for those and for up to date references relevant to this checklist, see [www.consort-statement.org](http://www.consort-statement.org).

For peer review only

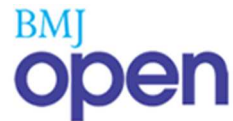

**Comparison of routine prenatal iron prophylaxis and screening and treatment for anemia: pregnancy results and preliminary birth results from a pragmatic randomized controlled trial (PROFEG) in Maputo, Mozambique**

|                                 |                                                                                                                                                                                                                                                                                                                                                                                                                                                                                                                                                                                                                                                                                                                                                                                                                                                                                                             |
|---------------------------------|-------------------------------------------------------------------------------------------------------------------------------------------------------------------------------------------------------------------------------------------------------------------------------------------------------------------------------------------------------------------------------------------------------------------------------------------------------------------------------------------------------------------------------------------------------------------------------------------------------------------------------------------------------------------------------------------------------------------------------------------------------------------------------------------------------------------------------------------------------------------------------------------------------------|
| Journal:                        | <i>BMJ Open</i>                                                                                                                                                                                                                                                                                                                                                                                                                                                                                                                                                                                                                                                                                                                                                                                                                                                                                             |
| Manuscript ID:                  | bmjopen-2012-001948.R2                                                                                                                                                                                                                                                                                                                                                                                                                                                                                                                                                                                                                                                                                                                                                                                                                                                                                      |
| Article Type:                   | Research                                                                                                                                                                                                                                                                                                                                                                                                                                                                                                                                                                                                                                                                                                                                                                                                                                                                                                    |
| Date Submitted by the Author:   | 10-Jan-2013                                                                                                                                                                                                                                                                                                                                                                                                                                                                                                                                                                                                                                                                                                                                                                                                                                                                                                 |
| Complete List of Authors:       | Parkkali, Saara; National Institute for Health and Welfare, Health Services and Policy Research<br>Nwaru, Bright; University of Tampere, School of Health Sciences<br>Abacassamo, Fatima; Eduardo Mondlane University, Department of Community Health<br>Salomé, Graca; Eduardo Mondlane University, Department of Biochemistry, Biology, Genetics and Molecular Biology<br>Augusto, Orvalho; Eduardo Mondlane University, Department of Community Health<br>Regushevskaya, Elena; National Institute for Health and Welfare, Health Services and Policy Research<br>Dgedge, Martinho; Ministry of Health,<br>Sousa, Cesar; Eduardo Mondlane University, Department of Community Health<br>Cliff, Julie; Eduardo Mondlane University, Department of Community Health<br>Chilundo, Baltazar; Eduardo Mondlane University, Department of Community Health<br>hemminki, elina; THL, Health and Social Services |
| <b>Primary Subject Heading</b>: | Health services research                                                                                                                                                                                                                                                                                                                                                                                                                                                                                                                                                                                                                                                                                                                                                                                                                                                                                    |
| Secondary Subject Heading:      | Epidemiology, Global health, Health policy, Health services research, Reproductive medicine, obstetrics and gynaecology                                                                                                                                                                                                                                                                                                                                                                                                                                                                                                                                                                                                                                                                                                                                                                                     |
| Keywords:                       | HIV & AIDS < INFECTIOUS DISEASES, Nutrition < TROPICAL MEDICINE, Community child health < PAEDIATRICS, PREVENTIVE MEDICINE, PUBLIC HEALTH, Epidemiology < TROPICAL MEDICINE                                                                                                                                                                                                                                                                                                                                                                                                                                                                                                                                                                                                                                                                                                                                 |
|                                 |                                                                                                                                                                                                                                                                                                                                                                                                                                                                                                                                                                                                                                                                                                                                                                                                                                                                                                             |

SCHOLARONE™  
Manuscripts

1  
2  
3 **Comparison of routine prenatal iron prophylaxis and screening and treatment for anemia:**  
4 **pregnancy results and preliminary birth results from a pragmatic randomized controlled trial**  
5 **(PROFEG) in Maputo, Mozambique**  
6  
7  
8  
9

10  
11  
12  
13  
14 Saara Parkkali<sup>1</sup>, Fatima Abacassamo<sup>2</sup>, Bright I Nwaru<sup>3</sup>, Graca Salomé<sup>4</sup>, Orvalho Augusto<sup>2</sup>, Elena  
15 Regushevskaya<sup>1</sup>, Martinho Dgedge<sup>5</sup>, Cesar Sousa<sup>2</sup>, Julie Cliff<sup>2</sup>, Baltazar Chilundo<sup>2</sup>, Elina  
16 Hemminki<sup>1</sup>  
17  
18  
19

20  
21 <sup>1</sup>National Institute for Health and Welfare, Health Services and Policy Research, Helsinki, Finland  
22

23  
24 <sup>2</sup>Department of Community Health, Eduardo Mondlane University, Maputo, Mozambique  
25

26  
27 <sup>3</sup>School of Health Sciences, University of Tampere, Tampere, Finland  
28

29  
30 <sup>4</sup>Department of Physiological Sciences, Eduardo Mondlane University, Maputo, Mozambique  
31

32  
33 <sup>5</sup>Ministry of Health, Maputo, Mozambique  
34  
35  
36  
37  
38  
39

40 **Running Title: Prenatal iron prophylaxis and maternal child health**  
41

42 **Corresponding author:**

43 Bright I. Nwaru

44 School of Health Sciences

45 33014 University of Tampere

46 Finland

47 Telephone: +358440127648

48 Fax: +358401901665

49 Email address: bright.nwaru@uta.fi  
50  
51  
52  
53  
54  
55  
56  
57  
58  
59  
60

**ABSTRACT**

**Objective:** To present the pregnancy results and interim birth results of a pragmatic randomized controlled trial comparing routine iron prophylaxis with screening and treatment for anemia during pregnancy in a setting of endemic malaria and HIV.

**Design:** A pragmatic randomized controlled trial

**Setting:** Two health centers (1° de Maio and Machava) in Maputo, Mozambique, a setting of endemic malaria and high prevalence of HIV.

**Participants:** Pregnant women ( $\geq 18$  years old; non-high-risk pregnancy,  $N=4326$ ) attending prenatal care consultation at the two health centers were recruited to the trial

**Interventions:** The women were randomly allocated to either Routine iron ( $n=2184$ ; 60 mg ferrous sulphate plus 400  $\mu\text{g}$  of folic acid daily throughout pregnancy) or Selective iron ( $n=2142$ ; screening and treatment for anemia and daily intake of 1 mg of folic acid).

**Outcome measures:** The primary outcomes were preterm delivery (delivery  $<37$  weeks of gestation) and low birth weight ( $<2500$  grams). The secondary outcomes were symptoms suggestive of malaria and self-reported malaria during pregnancy; birth length; cesarean section; maternal and child health status after delivery.

**Results:** The number of follow-up visits was similar in the two groups. Between the first and fifth visits, the two groups were similar regarding the occurrence of fever, headache, cold/chills, nausea/vomiting, and body aches. There was a suggestion of increased incidence of self-reported malaria during pregnancy (odds ratio 1.37, 95% confidence interval 0.98-1.92) in the Routine iron group. Birth data were available for 1109 (51%) in the Routine iron and for 1149 (54%) in the Selective iron groups. The birth outcomes were relatively similar in the two groups. However, there was a suggestion (statistically non-significant) of poorer outcomes in the Routine iron group with regard to long hospital stay after birth (relative risk [RR] 1.43, 95% CI 0.97-1.26; risk difference

1  
2  
3 [RD] 0.02, 95% CI -0.00-0.03) and unavailability of delivery data (RR 1.06, 95% CI 1.00-1.13; RD  
4  
5 0.03, 95% CI -0.01-0.07).

6  
7 **Conclusions:** These interim results suggest that routine iron prophylaxis during pregnancy did not  
8  
9 confer advantage over screening and treatment for anemia regarding maternal and child health.  
10  
11 Complete data on birth outcomes are being collected for firmer conclusions.  
12

13  
14  
15  
16 **Trial registration:** The trial is registered at ClinicalTrials.gov, number NCT00488579 (June 2007).  
17  
18 The first women were randomized to the trial proper April 2007- March 2008. The pilot was  
19  
20 November 2006-March 2008. The 3-month lag was due to technical difficulties in completing trial  
21  
22 registration.  
23

24  
25  
26  
27 **Funding:** The study was funded by two grants from the Academy of Finland (2004: 210631; 2010:  
28  
29 139191).  
30

31  
32  
33  
34  
35 **Keywords:** iron, pregnancy, birth, malaria, HIV, pragmatic trial, Mozambique  
36  
37  
38  
39  
40  
41  
42  
43  
44  
45  
46  
47  
48  
49  
50  
51  
52  
53  
54  
55  
56  
57  
58  
59  
60



**ARTICLE SUMMARY:****Article focus:**

- The benefits of iron prophylaxis during pregnancy on maternal and child health in developing country settings with endemic malaria and high prevalence of HIV is unclear.
- Iron has been linked to increased risk of infections.
- Among children less than three years, there are indications of harm of universal iron prophylaxis.

**Key messages:**

- Routine iron prophylaxis during pregnancy did not suggest better maternal and child health outcomes than screening and treatment for anemia in a setting of endemic malaria and HIV.

**Strengths and limitations of this study**

- So far, this represents the largest trial investigating the benefits of prophylactic iron during pregnancy on maternal and child health in malaria-endemic settings.
- The compliance of the study nurses with the trial protocol and that of the women with regards to uptake of the iron and folic acid tablets was good, as was the follow-up during pregnancy.
- The collection of delivery data was challenging, resulting in up to an estimated 40% of missing birth data, which are now been traced using various methods.

## INTRODUCTION

Despite widespread recommendation of routine iron prophylaxis during pregnancy, its benefits and risks for the mother and child, beyond the reduction of the risk of anemia, remain unclear, particularly in low-income settings. Reviews of randomized controlled trials (RCTs) done for the Cochrane Collaboration and the World Health Organization (WHO) have failed to conclude on the effects of routine iron prophylaxis during pregnancy on pregnancy and birth outcomes.<sup>1,2</sup> There is some evidence that high hemoglobin concentration in late pregnancy may be associated with adverse effects on pregnancy.<sup>3,4</sup> Based on evidence from non-pregnant populations, it has been suggested that iron may advance the rate of infections.<sup>5-7</sup> The host requires iron for biochemical functioning, but iron may as well promote the replication of infectious agents.<sup>6</sup> For developing country settings which are still plagued by infectious diseases, such as malaria and HIV, the possible association between iron and infections raises serious public health concerns.<sup>8,9</sup>

Previous trials conducted in malarial developing country settings that have evaluated the effects of iron supplementation during pregnancy on maternal and child outcomes have been hampered by small samples, large dropouts, and several outcome-related exclusions.<sup>10-14</sup> The findings from the trials were conflicting on the role of prophylactic iron supplementation on birth weight, prematurity, perinatal mortality, incidence of malaria, and other pregnancy and birth outcomes. Consequently, the evidence they provide is insufficient in addressing the question of the advantages and disadvantages of prenatal prophylactic iron. The results of studies from non-malarial areas<sup>15-21</sup>, although of better quality, may not be relevant due to different settings.<sup>15-21</sup> Although, results were also conflicting in a number of outcomes, the main findings included slightly longer birth length,

1  
2  
3 longer gestational age, and reduced risk of preterm delivery, intrapartum hemorrhage, low birth  
4 weight, and infant and child mortality in the iron-folic acid group.<sup>22</sup>  
5  
6  
7

8  
9 This limited evidence and the importance of iron prophylaxis in prenatal programs call for further  
10 investigation on the benefits of prenatal iron supplementation in areas of endemic malaria and high  
11 prevalence of HIV. Using a pragmatic randomized controlled trial, we investigated the effects of  
12 routine iron prophylaxis throughout pregnancy compared to screening and treatment for anemia on  
13 maternal and child health in Maputo, Mozambique. The present paper presents the pregnancy  
14 results and interim birth results. About 40% of births were missed by the original data collection  
15 method<sup>22</sup>, and missing birth data are currently being retrieved with various complementary  
16 methods. The completed birth results will be presented later.  
17  
18  
19  
20  
21  
22  
23  
24  
25  
26  
27

## 28 29 **MATERIALS AND METHODS**

### 30 *Study design and population*

31  
32 The details of the PROFEG trial have been described elsewhere<sup>22</sup> and only the main features are  
33 given here. The trial was a pragmatic randomized controlled trial to compare two iron  
34 administration policies (routine iron prophylaxis versus screening and treatment for anemia during  
35 pregnancy) on maternal and child health in Maputo, Mozambique. The trial was carried out in two  
36 health centers, 1o de Maio in Maputo City, the capital (November 2006 - October 2008) and  
37 Machava 2, in Maputo Province (June 2007 - October 2008), Mozambique. The completion of  
38 collection of birth data continued until 2012. The health center of Machava 2 in Maputo province is  
39 close to Maputo city. The population is urban and semi urban and malaria is endemic in both areas.  
40  
41 Seasonal increase of malaria is usually observed towards the end of the rainy season (February to  
42  
43  
44  
45  
46  
47  
48  
49  
50  
51  
52  
53  
54  
55  
56  
57  
58  
59  
60  
April).<sup>23</sup>

1  
2  
3  
4  
5  
6 In the study area all woman are eligible to attend prenatal care. The usual care recommendations at  
7  
8 the time of the trial included daily prophylactic iron-folate supplementation (60 mg+400 µg)  
9  
10 throughout pregnancy; one dose of mebendazol 500 mg for intestinal parasite; three doeses of  
11  
12 sulfadoxine pyrimethamine for malaria prophylaxis (started around 20 weeks gestation, or when  
13  
14 quickening occurs, or when the foetal heart is heard); hemoglobin measurement (Lovibond ® is  
15  
16 routinely used) and syphilis screening at the first prenatal visit; and three doses of tetanus vaccine  
17  
18 (at the 5<sup>th</sup> and 7<sup>th</sup> month and at delivery). If malaria was suspected during prenatal consultations, it  
19  
20 was diagnosed by laboratory tests and clinical signs. In most health centers, including our study  
21  
22 centers, HIV testing was offered.<sup>22</sup> Antiretroviral (ARV) drugs were provided by various  
23  
24 international organizations, but we do not have information of how many women received treatment  
25  
26 during pregnancy. The recommendation was to give ARV (Nevirapine) at delivery to prevent  
27  
28 mother-child transmission.  
29  
30  
31  
32  
33  
34

### 35 ***Recruitment of study participants***

36  
37 Pregnant women attending their first prenatal visit were the target group. During the routine early  
38  
39 morning health education sessions, all women who came for their first prenatal visit were given  
40  
41 general information about the study. Recruitment into the study occurred during individual  
42  
43 consultations and was carried out by study nurses who were employed and trained by the project. In  
44  
45 1<sup>o</sup> de Maio health center, the women visited the study nurses after their routine prenatal care  
46  
47 consultations with the maternal and child health (MCH) nurses. In Machava, the study nurse and the  
48  
49 routine MCH nurse saw the women in the same room. The study nurses checked for women's  
50  
51 eligibility to participate in the study. The exclusion criteria were: women with high obstetric risk  
52  
53 and those aged less than 18 years. If eligible, the nurses asked the women to join the study. Oral and  
54  
55  
56  
57  
58  
59  
60

1  
2  
3 written informed consent was obtained. Three types of women were missed from the study: women  
4  
5 whom MCH nurses sent back home because of too early pregnancy, women who did not go to the  
6  
7 study nurse, and women who refused the study.  
8  
9

### 10 11 12 13 14 15 16 ***Randomization***

17  
18 The women were randomized into either the Routine iron group (i.e., routine iron prophylaxis from  
19  
20 the first to the last prenatal visit) or the Selective iron group group (i.e. regular screening for  
21  
22 hemoglobin level and treatment for anemia). Researcher (OA) use the STATA statistical software  
23  
24 (StataCorp LP, Texas, USA) was used to generate sequential random numbers separately for the  
25  
26 two centers and the women were assigned to either of the groups with a probability of 50%. The  
27  
28 codes for the groups were put into sealed and numbered opaque envelopes; the number was the  
29  
30 woman's study number and was repeated in the documents in the envelope. The envelope contained  
31  
32 a study identification card (yellow for the Routine iron group and pink for the Selective, 10 x 20cm)  
33  
34 and the informed consent form.  
35  
36  
37  
38  
39

### 40 41 ***Sample size***

42  
43 We did not have up-to-date reliable baseline data of pregnant women's and newborns' health in  
44  
45 Maputo or of the effects of iron on pregnancy and birth outcomes. Thus , we used different  
46  
47 estimates of the baseline values for preterm delivery, low birth weight, clinical malaria, and  
48  
49 perinatal mortality to calculate the sample size, with power (85% and 90%), significance level of  
50  
51 5%, and the size of the difference to be detected (20% and 30%). Based on these calculations and  
52  
53 the expected feasibility, we decided a sample size of 2000 women in each group to be enough to  
54  
55 measure clinically meaningful effects. The STATA statistical software was used to estimate the  
56  
57  
58  
59  
60

1  
2  
3 sample size. A table showing the various baseline assumptions used for power calculation and in  
4  
5 estimating the sample size for the study is included as Appendix 1.  
6  
7  
8  
9  
10  
11  
12  
13  
14  
15

### 16 ***Interventions***

17  
18  
19 On each prenatal visit, women in the Routine iron group received 30 tablets (supply of one month)  
20  
21 of 60 mg ferrous sulphate plus 400 µg of folic acid per day combined in one tablet. In the Selective  
22  
23 group, women's hemoglobin levels were measured at each visit by the study nurses using a rapid  
24  
25 hemoglobin measure, HemoCue® Hb 201+, (Hemocue AB, Ängelholm, Sweden). If the  
26  
27 hemoglobin was 9g/dl or more, they received 30 tablets of 1 mg of folic acid per day. If their  
28  
29 hemoglobin was below the cut-off of <9g/dl Hb, they received a monthly double dose of iron (60  
30  
31 mg + 60 mg) for the treatment of anemia. Folic acid 1 mg tablets were used because at the time of  
32  
33 the trial pure folic acid was not licensed in Mozambique in 400 µg tablets. The tablets were given in  
34  
35 a plastic bag having the drug's name and dosage on it.  
36  
37  
38  
39  
40  
41

### 42 ***Data collection and follow-up***

43  
44 Data were collected on standard study data forms by three methods: 1) study nurses abstracted  
45  
46 prenatal data from mothers' maternity cards, 2) study nurses asked women additional questions at  
47  
48 the time of the prenatal visits, and 3) study nurses or researchers afterwards collected birth data  
49  
50 from hospital birth records. Delivery nurses were informed of the study and asked to put the  
51  
52 delivery cards into a separate study box. The study women were to be identified by the color of the  
53  
54 identification card stapled to their maternity card. However, this did not succeed very well. By  
55  
56  
57  
58  
59  
60

1  
2  
3 excluding estimated late miscarriages (5%), early stillbirths (3 %) and home births (10%), we  
4  
5 should have received delivery data for 3547 women (82%) of the 4326 women who participated in  
6  
7 the trial. We received birth data for only 2258 (64% of the estimated 3547) women.  
8  
9

### 10 11 12 13 ***Outcome measures***

14  
15  
16 The primary outcomes were preterm delivery (delivery <37 weeks of gestation and low birth weight  
17 (<2500 grams); data on weight came from the birth records; for gestation weeks various routine  
18 data sources were used (see below). Originally, we had malaria activation as a primary outcome, but  
19 the pilot showed that it was not feasible. Secondary outcomes were perinatal mortality (as available  
20 from our data collection forms; unlikely to cover early stillbirths or neonatal deaths occurring at  
21 home); complications during pregnancy and labor; symptoms suggestive of malaria (fever,  
22 headache, cold/chills, nausea/vomiting, and body aches); and self-reported malaria during  
23 pregnancy (the woman was asked for diagnosed malaria since her last visit).  
24  
25  
26  
27  
28  
29  
30  
31  
32  
33  
34  
35

### 36 ***Gestational weeks***

37  
38 In the prenatal visits routine MCH nurses determined gestational weeks in various ways, even  
39 though all ways were not systematically noted down. In the first prenatal visits, the date of last  
40 menstrual period, uterine fundal height, assumed date of delivery and length of gestation (best  
41 estimate) were noted. The study nurses abstracted all this information and the best estimate was  
42 used in this paper. In birth records, the last menstrual period, date of fertilization, assumed date of  
43 fertilization, and length of gestation were to be given by delivery nurses. However, these data were  
44 very poorly filled and only 681 (30%) of the women with delivery data had their gestational weeks  
45 recorded at birth. Thus the gestational weeks for women without that information was estimated  
46 from dates using the following algorithm: gestational weeks at first visit in days + days between the  
47  
48  
49  
50  
51  
52  
53  
54  
55  
56  
57  
58  
59  
60

1  
2  
3 first visit and delivery; the days were then transformed into weeks. For some women (n = 196), the  
4 date of delivery was not available. In these cases, date of discharge from the hospital after delivery  
5 (minus the length of stay at the hospital) (n = 22) or the date of admission to the hospital (n = 60  
6 women who did not have the date of discharge) was used.  
7  
8  
9  
10

### 11 *Adherence*

12  
13  
14  
15  
16 The women were instructed and encouraged at each visit to take the tablets they were given.  
17  
18 Women allocated to the Routine iron group could refuse to take the iron tablets and they were  
19 classified as non-compliant with the intervention. Women who belonged in the Selective iron group  
20 and who wanted iron (even if their hemoglobin level was not below the cut-off level) were given  
21 iron; they were classified as non-compliant with the intervention. The following questions were  
22 asked on each visit: “Was hemoglobin measured?”; “Was iron/folic acid given to the woman?”;  
23 “Number of iron/folic acid tablets given?”; “Did the woman take the tablets during the past week?”  
24  
25 At each subsequent visit, almost all of the Selective iron women (98%) were measured for  
26 hemoglobin using the recommended HemoCue® method and the same proportion of women in the  
27 Routine iron group were given iron tablets at each subsequent visit.  
28  
29  
30  
31  
32  
33  
34  
35  
36  
37  
38  
39  
40

### 41 *Ethical approval*

42  
43 Ethical approval for the study was obtained from the Mozambique Ministry of Health Ethics  
44 Committee (CNBS [Ref. 84/CNBS/06]). A positive statement was obtained from the National  
45 Research and Development Centre for Welfare and Health (STAKES) (now the National Institute  
46 for Health and Welfare), Helsinki, Finland (Dno 2571/501/2007). The trial is registered at  
47  
48  
49  
50  
51  
52  
53  
54  
55  
56  
57  
58  
59  
60  
ClinicalTrials.gov, number NCT00488579.



### *Statistical analysis*

All analyses were done on an intention-to-treat basis. Twin pregnancies ( $n = 48$  pairs) were included in the analysis because their numbers were similar in the two groups and their exclusion did not alter the results. For pregnancy outcomes, all women ( $n = 4326$ ), and for birth outcomes, women with birth data ( $n = 2258$ ) were included. Differences in health indicators (fever, headache, cold/chills, nausea/vomiting, body aches, malaria) between the two iron groups at each subsequent visit (up to the 5<sup>th</sup> visit) during pregnancy were analyzed by using binomial generalized estimating equations (GEE) with an exchangeable correlation structure. GEE takes into account the within person correlation in the setting of repeated measures.

Differences in continuously distributed birth outcomes (birth weight, duration of gestation, length of hospital stay) were analyzed by using the two sample Student's *t*-test. Categorical outcomes were analyzed by using Pearson Chi-square test or Fisher's exact test (in the case of cells with less than 5 cases). To estimate the risk ratios of the effect of iron, the binary birth outcomes (low birth weight [ $< 2500$  g], preterm birth [ $< 37$  weeks], cesarean section delivery, child and maternal ill-health or death at birth, negative fetal heart beat, delivery in a reference health center, long hospital stay after birth [ $\geq 2$  days], and unavailability of delivery data) were analyzed by generalized linear models. The result estimates are presented with 95% confidence intervals (95% CI). Statistical significance was set at  $P < 0.05$ . STATA 11 statistical software was used for the analyses.

### **RESULTS**

Of the 4326 women recruited to the trial, 2184 were randomly allocated to the Routine iron group and 2142 to the Selective iron group (Figure 1). The total number of prenatal visits varied but the maximum number of visits was seven. The number of follow-up visits was similar in the two groups (Figure 1). About 40% of delivery data were missed when using the original data collection

1  
2  
3 method and the interim birth data were available for 1109 (51%) in the Routine iron group and for  
4  
5 1149 (54% of women) in the Selective.  
6  
7

8  
9 Table 1 compares maternal background characteristics between the groups by the availability of  
10 birth data. Mean hemoglobin for the Selective group was similar between those with and without  
11 delivery data. The occurrence of symptoms suggestive of malaria (fever, headache, cold/chills,  
12 nausea/vomiting, and body aches) and self-reported malaria during the current pregnancy prior to  
13 the first prenatal visit were similar between the Routine and Selective iron groups. The women in  
14 the two groups with and without birth data were comparable.  
15  
16  
17  
18  
19  
20  
21  
22  
23  
24

25 Between the first and fifth visits, the two groups were similar regarding the occurrence of fever,  
26 headache, cold/chills, nausea/vomiting, and body aches (Table 2). There was a suggestion of  
27 increased incidence of self-reported malaria during pregnancy (odds ratio 1.37, 95% confidence  
28 interval 0.98-1.92) in the Routine iron group (Table 2). Table 2 presents the data for the second and  
29 third follow-up visits, but this was the case also in subsequent visits (data not shown).  
30  
31  
32  
33  
34  
35  
36  
37

38 Tables 3 presents the distribution of birth data by intervention group and Table 4 gives the estimates  
39 of the effect sizes on the birth outcomes. The birth outcomes were similar in the two groups.  
40 However, there was a suggestion (statistically non-significant) that the Routine iron group had  
41 worse outcomes in regard to babies with negative heartbeat at admission, and longer mother's  
42 hospital stay after birth (Table 3). The effect of iron on the primary outcomes was similar in the two  
43 groups. The groups were also relatively similar concerning most other outcomes. However, there  
44 was a suggestion of more babies with negative fetal heartbeat at admission, longer mother's hospital  
45 stay after birth and unavailability of delivery data in the Routine iron group (Table 4). By excluding  
46  
47  
48  
49  
50  
51  
52  
53  
54  
55  
56  
57  
58  
59  
60

1  
2  
3 births by cesarean section, the estimates for longer mother's hospital stay remained the same (data  
4  
5 not shown).  
6  
7  
8

## 9 10 **DISCUSSION**

11 The results from this trial indicate that routine iron prophylaxis during pregnancy was not  
12  
13 advantageous over the policy of screening and treatment for anemia with regard to pregnancy and  
14  
15 birth outcomes. If anything, screening and treatment for anemia appeared to be better. Among all  
16  
17 the trial women there was a suggestion of an increased risk of self-reported malaria during  
18  
19 pregnancy seen in the Routine iron group. The interim birth data suggested longer hospital stay after  
20  
21 birth and higher risk of negative fetal heart beat in the Routine iron group. However, all these  
22  
23 differences were statistically non-significant and the complete birth data are needed to conclude any  
24  
25 putative effects of iron on birth outcomes.  
26  
27  
28  
29  
30  
31  
32

33 One of the strengths of our trial is its large sample. So far, this represents the largest trial  
34  
35 investigating the benefits of prophylactic iron during pregnancy on maternal and child health in  
36  
37 malaria-endemic settings. The compliance of the study nurses with the trial protocol and that of the  
38  
39 women with regards to uptake of the iron and folic acid tablets was good, as was the follow-up  
40  
41 during pregnancy.<sup>22</sup> However, during pregnancy, we lacked objective measures of malaria; hence,  
42  
43 our results may not reflect the putative effect of iron on clinical malaria. The collection of delivery  
44  
45 data was challenging, resulting in up to an estimated 40% of missing birth data. We did not realize  
46  
47 the extent of the problem until most deliveries had occurred. We are currently tracing the birth data  
48  
49 using various methods (abstracting hospital records and death register data and calling women),  
50  
51 with results to be reported separately after finalization.  
52  
53  
54  
55  
56  
57  
58  
59  
60

1  
2  
3 A comparison of our findings with previous studies conducted in malaria endemic areas is  
4 problematic because of key differences: the previous studies have compared iron versus no iron and  
5 our study compares two policies of iron administration: routine prophylaxis versus screening and  
6 treatment. Nevertheless, the studies from Nigeria<sup>11</sup> and The Gambia<sup>12</sup> found no significant effect of  
7 iron prophylaxis on malaria; they had used a more reliable measure of malaria (clinical and  
8 parasitological analysis). A Ugandan study<sup>14</sup> did not observe any effect of iron supplementation on  
9 the incidence of congenital malaria in the offspring. A Bangladeshi study<sup>10</sup> found a difference in  
10 preterm delivery (less in the non-iron group), but no association was seen with other outcomes  
11 examined, similar to the Nigerian study<sup>11</sup>, including abortion, hypertension, eclampsia, postnatal  
12 complications, birth weight, Apgar scores, prematurity, development of diarrhea at 6 weeks, and  
13 perinatal mortality. Other benefits reported with iron prophylaxis include increased mean birth  
14 weight<sup>12,14</sup>, reduced incidence of prematurity<sup>12</sup>, and increased birth length and Apgar score.<sup>13</sup>  
15  
16  
17  
18  
19  
20  
21  
22  
23  
24  
25  
26  
27  
28  
29  
30  
31  
32

33 Although more complete birth data are needed to reach firm conclusions, we can speculate that the  
34 potential for higher incidence of unavailable delivery data in the Routine iron group may indicate  
35 that these women had more adverse outcomes, such as miscarriage and stillbirths, and consequently  
36 did not deliver in the expected health centers. Similarly, the higher likelihood of longer mother's  
37 hospital stay after birth in the Routine iron group may also be indicative of more problems at birth.  
38 Delivery by cesarean section did not explain the longer hospital stay as the estimate remained the  
39 same after excluding the births that occurred by cesarean section.  
40  
41  
42  
43  
44  
45  
46  
47  
48  
49  
50  
51  
52

53 Anemia has been associated with maternal and child health risks<sup>24-26</sup>, and the association between  
54 iron and increased risk of infections<sup>5-7</sup> calls for more definitive evidence on the benefits of iron  
55  
56  
57  
58  
59  
60

1  
2  
3 prophylaxis during pregnancy in settings with increased infectious diseases where infections remain  
4 a major cause of maternal and child mortality.<sup>8,9</sup> Our trial in Maputo, Mozambique, is an attempt to  
5 investigate whether routine iron prophylaxis during pregnancy is more effective than screening and  
6 treatment for anemia in improving maternal and child health in an area of endemic malaria and  
7 HIV.  
8  
9  
10  
11  
12

## 13 14 15 16 17 18 **CONCLUSIONS**

19  
20 These interim results from this pragmatic randomized controlled trial indicate that routine iron  
21 prophylaxis during pregnancy did not suggest better maternal and child health outcomes than the  
22 policy of screening and treatment for anemia. If anything, screening and treatment for anemia  
23 appeared to be better. The complete birth data are needed for a firm conclusion. Which of the two  
24 methods, Routine or Selective iron prophylaxis, is more feasible, will be discussed in later  
25 publications.  
26  
27  
28  
29  
30  
31  
32  
33  
34  
35  
36  
37

## 38 **ACKNOWLEDGMENTS**

39  
40 The study was funded by two grants from the Academy of Finland (2004: 210631; 2010: 139191).  
41  
42  
43  
44  
45  
46

## 47 **AUTHORS' CONTRIBUTION**

48  
49 Designed, analyzed, and wrote the paper (BIN, EH, ER, and SP). Designed and responsible for the  
50 conception of the PROFEG Trial (EH). Participated in the planning of the PROFEG Trial and made  
51 substantial contribution in its execution and participated in interpretation of results and critically  
52  
53  
54  
55  
56  
57  
58  
59  
60

1  
2  
3 reviewing the manuscript (BC, CS, EH, FA, GS, JC, MD, MN, OA, SP). Responsible for data  
4  
5 preparation and cleaning (ER, OA).  
6  
7  
8  
9

## 10 11 **COMPETING INTEREST**

12  
13  
14 None declared.  
15  
16  
17  
18  
19

## 20 21 **DATA SHARING**

22  
23 Statistical codes and dataset are available from the corresponding author bright.nwaru@uta.fi.  
24  
25 Informed consent was not obtained for data sharing but the presented data are anonymised and risk  
26  
27 of identification is low.  
28  
29  
30  
31  
32  
33  
34  
35  
36  
37  
38  
39

## 40 41 **REFERENCES**

- 42  
43 1. Peña-Rosas JP, Viteri FE. Effects and safety of preventive oral iron or iron+folic acid  
44  
45 supplementation for women during pregnancy. *Cochrane Database of Systematic Reviews*  
46  
47 2009, Issue 4, art. No.: CD004736.  
48  
49 2. Villar J, Merialdi M, Gulmezoglu AM, et al. Nutritional interventions during pregnancy for  
50  
51 the prevention or treatment of maternal mortality and preterm delivery: an overview of  
52  
53 randomized controlled trials. *J Nutr* 2003; 133:1606-25.  
54  
55  
56  
57  
58  
59  
60

- 1  
2  
3 3. Lao TT, Tam KF, Chan LY. Third trimester iron status and pregnancy outcome in non-  
4  
5 anaemic women: pregnancy unfavourably affected by maternal iron excess. *Hum Reprod*  
6  
7 2000; 15: 1843-48.
- 8  
9  
10 4. Yip R. Significance of an abnormally low or high hemoglobin concentration during  
11  
12 pregnancy: special consideration of iron nutrition. *Am J Clin Nutr* 2000 72: 272S-9S.
- 13  
14 5. Oppenheimer SJ. Iron and its relation to immunity and infectious disease. *J Nutr* 2001; 131:  
15  
16 616S-35S.
- 17  
18 6. Prentice AM. Iron metabolism, malaria, and other infections: what is all the fuss about? *J*  
19  
20 *Nutr* 2008; 138: 2537-41.
- 21  
22 7. Gera T, Sachdev HP. Effect of iron supplementation on incidence of infectious illness in  
23  
24 children: systematic review. *BMJ* 2002; 325: 1142.
- 25  
26 8. Lawn JE, Cousens S, Zupan J, Lancet Neonatal Survival Steering Team. 4 million neonatal  
27  
28 deaths: When? Where? Why? *Lancet* 2005; 365: 891-900.
- 29  
30  
31 9. Idemyor V. Human Immunodeficiency Virus (HIV) and Malaria Interaction in Sub-Saharan  
32  
33 Africa: The Collision of Two Titans. *HIV Clin Trials* 2007; 8: 246-53.
- 34  
35  
36 10. Juncker T, Ameer S, Mmaum A, et al. A trial of iron and folate supplementation during  
37  
38 pregnancy in Bangladesh. Abstract presented at the American Public Health Association,  
39  
40 2001, Atlanta, USA.
- 41  
42  
43 11. Fleming AF, Ghatoura GB, Harrison KA, et al. The prevention of anaemia in pregnancy in  
44  
45 primigravidae in the guinea savanna of Nigeria. *Ann Trop Med Parasitol* 1986; 80: 211-33.
- 46  
47  
48 12. Menendez C, Todd J, Alonso PL, et al The effects of iron supplementation during  
49  
50 pregnancy, given by traditional birth attendants, on the prevalence of anaemia and malaria.  
51  
52 *Trans R Soc Trop Med Hyg* 1994; 88: 590-3.
- 53  
54  
55  
56  
57  
58  
59  
60

- 1  
2  
3 13. Preziosi P, Prual A, Galan P, et al. Effect of iron supplementation on the iron status of  
4  
5 pregnant women: consequences for newborns. *Am J Clin Nutr* 1997; 66: 1178-82.  
6
- 7 14. Ndyomugenyi R, Magnussen P. Chloroquine prophylaxis, iron/folic-acid supplementation  
8  
9 or case management of malaria attacks in primigravidae in western Uganda: effects on  
10  
11 congenital malaria and infant haemoglobin concentrations. *Ann Trop Med Parasitol* 2000;  
12  
13 94: 759-70.  
14
- 15 15. Christian P, Khattry SK, Katz J, et al. Effects of alternative maternal micronutrient  
16  
17 supplements on low birth weight in rural Nepal: a double blind randomized community trial.  
18  
19 *BMJ* 2003; 326: 571.  
20  
21
- 22 16. Christian P, West KP, Khattry SK, et al. Effects of maternal micronutrient supplementation  
23  
24 on fetal loss and infant mortality: a cluster-randomized trial in Nepal. *Am J Clin Nutr* 2003;  
25  
26 78: 1194-1202.  
27  
28
- 29 17. Christian P, Darmstadt GL, Wu L, et al The effect of maternal micronutrient  
30  
31 supplementation on early neonatal morbidity in rural Nepal: a randomized, control,  
32  
33 community trial. *Arch Dis Child* 2008; 93: 660-4.  
34  
35
- 36 18. Christian P, Khattry SK, LeClerq SC, et al. Effects of prenatal micronutrient supplementation  
37  
38 on complications of labor and delivery and puerperal morbidity in rural Nepal. *Int J*  
39  
40 *Gynaecol Obstet* 2009; 106: 3-7.  
41  
42
- 43 19. Christian P, Stewart CP, LeClerq SC, et al. Antenatal and postnatal iron supplementation  
44  
45 and childhood mortality in rural Neap: a prospective follow-up in a randomized, controlled  
46  
47 community trial. *Am J Epidemiol* 2009; 170: 1127-36.  
48  
49
- 50 20. Christian P, Murray-Kolb LE, Khattry SK, et al. Prenatal micronutrient supplementation and  
51  
52 intellectual and motor function in early school-aged children in Nepal. *JAMA* 2010; 304:  
53  
54 2716-23.  
55  
56  
57  
58  
59  
60



- 1  
2  
3 21. Zeng L, Dibley MJ, Cheng Y, et al. Impact of micronutrient supplementation during  
4 pregnancy on birth weight, duration of gestation, and perinatal mortality in rural western  
5 China: double blind cluster randomized controlled trial. *BMJ* 2008; 337: a2001.  
6  
7  
8  
9  
10 22. Nwaru BI, Parkkali S, Abacassamo F, et al. A pragmatic randomised controlled trial on  
11 routine iron prophylaxis during pregnancy in Maputo, Mozambique (PROFEG): rationale,  
12 design, and success. *Matern Child Nutr*. In press.  
13  
14  
15  
16 23. Dgedge M. Implementation of an insecticide Bednet programme for malaria prevention  
17 through the primary health care system in Mozambique. Doctoral thesis. London School of  
18 Hygiene and Tropical Medicine, 2000.  
19  
20  
21  
22  
23 24. Müngen E. Iron supplementation in pregnancy. *J Perinat. Med* 2003; 31: 420-6.  
24  
25  
26 25. Brabin BJ, Hakimi M, Pelletier D. An analysis of anemia and pregnancy-related maternal  
27 mortality. *J Nutr*. 2001; 131(suppl): 604S-15S.  
28  
29  
30 26. Stoltzfus RJ, Mullanny L, Black RE. Iron deficiency anaemia. In: Ezzati M, Lopez AD,  
31 Rodgers A. et al, eds. Comparative Quantification of Health Risks: Global and Regional  
32 Burden of Disease Attributable to Selected Major Risk Factors. Vol 1. Geneva, Switzerland:  
33 World Health Organization; 2004: 163-209.  
34  
35  
36  
37  
38  
39  
40  
41  
42  
43  
44  
45  
46  
47  
48  
49  
50  
51  
52  
53  
54  
55  
56  
57  
58  
59  
60

Table 1. Characteristics of women at recruitment by availability of delivery data and group allocation, proportions % (numbers)

| Characteristics                          | Delivery data, <i>N</i> = 2258 |                | No delivery data, <i>N</i> = 2068 |                |
|------------------------------------------|--------------------------------|----------------|-----------------------------------|----------------|
|                                          | Selective iron                 | Routine iron   | Selective iron                    | Routine iron   |
|                                          | (1149)                         | (1109)         | (993)                             | (1075)         |
|                                          | % ( <i>n</i> )                 | % ( <i>n</i> ) | % ( <i>n</i> )                    | % ( <i>n</i> ) |
| Maternal age, mean (SD) years            | 24.6 (5.4)                     | 24.7 (5.3)     | 25.0 (5.6)                        | 24.6 (5.6)     |
| Maternal age (categorized)               |                                |                |                                   |                |
| < 20 years                               | 17.5 (201)                     | 16.5 (183)     | 15.7 (156)                        | 19.3 (207)     |
| 20-24 years                              | 41.1 (472)                     | 39.9 (443)     | 39.0 (387)                        | 37.1 (399)     |
| 25-29 years                              | 23.1 (265)                     | 23.3 (258)     | 23.9 (237)                        | 23.4 (252)     |
| 30-34 years                              | 11.3 (130)                     | 13.8 (153)     | 12.9 (128)                        | 13.3 (143)     |
| ≥ 35 years                               | 6.3 (72)                       | 5.6 (62)       | 7.4 (74)                          | 6.5 (70)       |
| Missing                                  | 0.8 (9)                        | 0.9 (10)       | 1.1 (11)                          | 0.4 (4)        |
| Hemoglobin by HemoCue® (g/dl), mean (SD) | 9.6 (1.7)                      |                | 9.6 (1.7)                         |                |
| Hemoglobin by HemoCue® (g/dl), n (%)     |                                |                |                                   |                |
| < 7.0                                    | 6.9 (79)                       |                | 6.2 (62)                          |                |
| 7.0-8.90                                 | 24.6 (283)                     |                | 25.4 (252)                        |                |
| 9.0-9.90                                 | 23.5 (270)                     |                | 24.4 (242)                        |                |
| 10.0-10.90                               | 21.9 (252)                     |                | 21.1 (210)                        |                |
| 11.0-11.90                               | 14.1 (162)                     |                | 13.7 (136)                        |                |
| ≥ 12.0                                   | 7.9 (91)                       |                | 8.4 (83)                          |                |
| Not measured                             | 1.0 (12)                       |                | 0.8 (8)                           |                |
| Previous abortions                       |                                |                |                                   |                |
| No                                       | 87.6 (1007)                    | 86.8 (963)     | 86.0 (854)                        | 85.4 (918)     |
| Yes                                      | 12.1 (139)                     | 12.8 (142)     | 13.6 (135)                        | 14.5 (156)     |
| Missing                                  | 0.3 (3)                        | 0.4 (4)        | 0.4 (4)                           | 0.1 (1)        |
| Gestational age, mean (SD) weeks         | 21.6 (5.9)                     | 21.7 (5.6)     | 21.0 (5.9)                        | 21.3 (5.8)     |

## Gestational age (categorized)

|                      |             |             |            |             |
|----------------------|-------------|-------------|------------|-------------|
| < 16                 | 19.2 (221)  | 16.4 (182)  | 21.5 (213) | 20.1 (216)  |
| 17-20                | 21.8 (250)  | 24.2 (268)  | 22.5 (223) | 21.7 (233)  |
| 21-26                | 34.3 (394)  | 32.6 (361)  | 31.3 (311) | 33.7 (362)  |
| > 27                 | 19.7 (226)  | 19.7 (219)  | 17.5 (174) | 18.2 (196)  |
| No information       | 58 (5.0)    | 7.1 (79)    | 7.3 (72)   | 6.3 (68)    |
| Previous stillbirths |             |             |            |             |
| No                   | 91.5 (1052) | 92.3 (1024) | 91.6 (910) | 91.0 (978)  |
| Yes                  | 8.2 (94)    | 7.2 (80)    | 7.9 (78)   | 8.9 (96)    |
| Missing              | 0.3 (3)     | 0.5 (5)     | 0.5 (5)    | 0.1 (1)     |
| Previous deliveries  |             |             |            |             |
| None                 | 29.7 (341)  | 30.3 (336)  | 29.2 (290) | 33.8 (363)  |
| One                  | 31.9 (367)  | 31.7 (352)  | 30.6 (304) | 28.5 (306)  |
| Two                  | 19.2 (221)  | 17.8 (197)  | 17.9 (178) | 18.6 (200)  |
| Three or more        | 18.8(216)   | 19.8 (220)  | 22.0 (218) | 19.0 (205)  |
| Missing              | 0.4 (4)     | 0.4 (4)     | 0.3 (3)    | 0.1 (1)     |
| HIV status           |             |             |            |             |
| Negative             | 81.2 (934)  | 81.8 (907)  | 76.7 (762) | 79.0 (849)  |
| Positive             | 18.8 (215)  | 18.2 (202)  | 23.3 (231) | 21.0 (226)  |
| Twin pregnancy       |             |             |            |             |
| No                   | 98.7 (1134) | 98.6 (1093) | 99.2 (985) | 99.2 (1066) |
| Yes                  | 1.3 (15)    | 1.4 (16)    | 0.8 (8)    | 0.8 (9)     |

---

*Symptoms during current pregnancy before first prenatal visit*


---

Fever

1  
2  
3  
4  
5  
6  
7  
8  
9  
10  
11  
12  
13  
14  
15  
16  
17  
18  
19  
20  
21  
22  
23  
24  
25  
26  
27  
28  
29  
30  
31  
32  
33  
34  
35  
36  
37  
38  
39  
40  
41  
42  
43  
44  
45  
46  
47  
48  
49  
50  
51  
52  
53  
54  
55  
56  
57  
58  
59  
60

---

|                       |            |            |            |            |
|-----------------------|------------|------------|------------|------------|
| Yes                   | 22.9 (264) | 24.4 (271) | 28.8 (286) | 23.8 (256) |
| Headache              |            |            |            |            |
| Yes                   | 41.5 (477) | 43.5 (482) | 44.3 (440) | 43.0 (462) |
| Cold/chills           |            |            |            |            |
| Yes                   | 18.0 (207) | 18.4 (204) | 20.6 (205) | 18.8 (202) |
| Vomit/nausea          |            |            |            |            |
| Yes                   | 27.5 (316) | 26.9 (298) | 29.8 (296) | 28.6 (307) |
| Body aches            |            |            |            |            |
| Yes                   | 21.8 (251) | 21.3 (237) | 23.8 (236) | 23.3 (251) |
| Self-reported malaria |            |            |            |            |
| Yes                   | 5.7 (66)   | 6.0 (67)   | 5.9 (59)   | 6.3 (68)   |
| Had malaria test      |            |            |            |            |
| Yes                   | 7.0 (80)   | 7.1 (79)   | 8.0 (79)   | 7.9 (85)   |

---

Table 2. Proportions (%) of women (numbers) with outcomes suggesting malaria during pregnancy, and odds ratios (OR) and 95% confidence intervals (95% CI) for group effect,  $n = 4326$

| Outcomes              | Second visit <sup>1</sup>         |                                 | Third visit <sup>2</sup>          |                                 | Between the first and fifth visit <sup>3</sup> |                  |                 |
|-----------------------|-----------------------------------|---------------------------------|-----------------------------------|---------------------------------|------------------------------------------------|------------------|-----------------|
|                       | % ( <i>n</i> )                    |                                 | % ( <i>n</i> )                    |                                 | OR (95% CI)                                    |                  | <i>P</i> -value |
|                       | Selective iron<br><i>n</i> = 1455 | Routine iron<br><i>n</i> = 1494 | Selective iron<br><i>n</i> = 1040 | Routine iron<br><i>n</i> = 1106 | Selective iron                                 | Routine iron     |                 |
| Fever                 | 11.5 (168)                        | 10.0 (150)                      | 11.3 (117)                        | 12.1 (134)                      | 1.00                                           | 0.95 (0.81-1.11) | 0.523           |
| Headache              | 24.9 (363)                        | 24.3 (363)                      | 24.9 (259)                        | 25.1 (278)                      | 1.00                                           | 0.98 (0.87-1.10) | 0.738           |
| Cold/chills           | 8.2 (120)                         | 7.0 (104)                       | 6.7 (70)                          | 7.8 (86)                        | 1.00                                           | 0.92 (0.76-1.11) | 0.361           |
| Vomit/nausea          | 9.1 (133)                         | 10.2 (153)                      | 8.5 (88)                          | 9.6 (109)                       | 1.00                                           | 1.09 (0.92-1.31) | 0.323           |
| Body aches            | 10.1 (147)                        | 9.2 (138)                       | 10.9 (113)                        | 9.8 (108)                       | 1.00                                           | 0.89 (0.75-1.06) | 0.180           |
| Self-reported malaria | 2.4 (35)                          | 3.0 (45)                        | 1.5 (16)                          | 2.2 (24)                        | 1.00                                           | 1.37 (0.98-1.92) | 0.068           |

<sup>1</sup>Between first and second visit

<sup>2</sup>Between second and third visit

<sup>3</sup>The effect estimates calculated by binomial generalized estimating equations (with exchangeable correlation structure) to account for the repeated measures of the outcomes.

Table 3. Birth outcomes by group allocation, percentages, % (numbers) of women or babies or means (SD).

| Outcomes                                     | Selective iron<br><i>n</i> = 1149 | Routine iron<br><i>n</i> = 1109 | <i>P</i> -value <sup>1</sup> |
|----------------------------------------------|-----------------------------------|---------------------------------|------------------------------|
| Birth weight, mean (SD) grams                | 2996.3 (508.4)                    | 2989.4 (514.9)                  | 0.752                        |
| Birth weight, % ( <i>n</i> )                 |                                   |                                 | 0.443                        |
| < 2500 g                                     | 11.8 (136)                        | 12.8 (142)                      |                              |
| 2500-2999 g                                  | 30.6 (351)                        | 31.1 (345)                      |                              |
| 3000-3499 g                                  | 40.5 (465)                        | 37.8 (419)                      |                              |
| 3500-3999 g                                  | 12.7 (146)                        | 13.8 (153)                      |                              |
| ≥ 4000 g                                     | 3.0 (34)                          | 2.1 (23)                        |                              |
| No information                               | 1.5 (17)                          | 2.4 (27)                        |                              |
| Duration of gestation, mean (SD) weeks       | 38.3 (4.2)                        | 38.4 (4.0)                      | 0.689                        |
| Duration of gestation, % ( <i>n</i> )        |                                   |                                 | 0.056                        |
| < 37 weeks                                   | 28.8 (331)                        | 27.0 (299)                      |                              |
| ≥ 37 weeks                                   | 67.2 (772)                        | 66.9 (742)                      |                              |
| No information                               | 4.0 (46)                          | 6.1 (68)                        |                              |
| Mode of delivery, % ( <i>n</i> )             |                                   |                                 | 0.235                        |
| Normal                                       | 87.6 (1007)                       | 89.4 (991)                      |                              |
| Cesarean section                             | 1.3 (15)                          | 2.0 (22)                        |                              |
| No information                               | 11.1 (127)                        | 8.7 (96)                        |                              |
| Child health status at birth, % ( <i>n</i> ) |                                   |                                 | 0.685                        |
| Well                                         | 94.0 (1080)                       | 92.1 (1022)                     |                              |
| Ill                                          | 0.7 (8)                           | 1.0 (11)                        |                              |
| Dead                                         | 1.8 (21)                          | 2.0 (22)                        |                              |
| No information                               | 3.5 (40)                          | 5.0 (55)                        |                              |

|                                                     |             |             |       |
|-----------------------------------------------------|-------------|-------------|-------|
| Still birth, % ( <i>n</i> )                         |             |             | 0.558 |
| No                                                  | 81.2 (933)  | 79.7 (884)  |       |
| Yes                                                 | 2.5 (29)    | 2.9 (32)    |       |
| No information                                      | 16.3 (187)  | 17.4 (193)  |       |
| Fetal heart beat at admission, % ( <i>n</i> )       |             |             | 0.085 |
| Negative                                            | 1.6 (18)    | 2.6 (29)    |       |
| Positive                                            | 85.6 (984)  | 85.2 (945)  |       |
| No information                                      | 12.8 (147)  | 12.2 (135)  |       |
| Mother's health status at birth, % ( <i>n</i> )     |             |             | 0.895 |
| Well                                                | 95.6 (1098) | 94.9 (1052) |       |
| Ill                                                 | 0.4 (4)     | 0.4 (4)     |       |
| Dead                                                | 0.1 (1)     | 0.2 (2)     |       |
| No information                                      | 4.0 (46)    | 4.6 (51)    |       |
| Length of hospital stay, mean (SD) days             | 1.33 (1.21) | 1.63 (1.30) | 0.075 |
| Length of hospital stay after birth, % ( <i>n</i> ) |             |             | 0.103 |
| ≤ 1 day                                             | 65.1 (748)  | 60.7 (673)  |       |
| 2 days                                              | 23.5 (270)  | 24.2 (268)  |       |
| ≥ 3 days                                            | 4.0 (46)    | 5.6 (62)    |       |
| No information                                      | 7.4 (85)    | 9.6 (106)   |       |
| Place of delivery, % ( <i>n</i> )                   |             |             | 0.652 |
| 1o de Maio (health center)                          | 44.4 (510)  | 42.6 (472)  |       |
| Machava (health center)                             | 35.1 (403)  | 38.2 (424)  |       |
| Jose Macamo (hospital)                              | 3.7 (43)    | 3.6 (40)    |       |
| Mavalane (hospital)                                 | 14.3 (164)  | 12.8 (142)  |       |

|                        |          |          |
|------------------------|----------|----------|
| Central Hospital       | 0.3 (3)  | 0.3 (3)  |
| At home                | 1.1 (13) | 1.3 (14) |
| On the way to hospital | 0.0 (0)  | 0.2 (2)  |
| No information         | 1.1 (13) | 1.1 (12) |

---

<sup>1</sup>Based on T-test for continuous outcomes, Pearson Chi-square test or Fisher's exact test for categorical outcomes. Subjects with no information were not included in the tests.

For peer review only



Table 4. Numbers, proportions (%), and risk ratios (RR, 95% confidence intervals CI) of birth outcomes by iron groups

| Outcomes                                     | Selective iron<br><i>n</i> | Routine iron<br><i>n</i> | Selective iron<br>% | Routine iron<br>% | Selective iron | Routine iron<br>RR (95% CI) <sup>2</sup> | <i>P</i> -value |
|----------------------------------------------|----------------------------|--------------------------|---------------------|-------------------|----------------|------------------------------------------|-----------------|
| <i>Primary health outcomes</i>               |                            |                          |                     |                   |                |                                          |                 |
| Low birth weight (<2500 grams)               | 136                        | 142                      | 11.8                | 12.8              | 1.00           | 1.09 (0.88-1.36)                         | 0.431           |
| Preterm delivery (<37 weeks)                 | 331                        | 299                      | 28.8                | 27.0              | 1.00           | 0.96 (0.84-1.09)                         | 0.185           |
| <i>Secondary health outcomes</i>             |                            |                          |                     |                   |                |                                          |                 |
| Cesarean section delivery                    | 15                         | 22                       | 1.3                 | 2.0               | 1.00           | 1.48 (0.77-2.84)                         | 0.238           |
| Negative fetal heart beat at admission       | 18                         | 29                       | 1.6                 | 2.6               | 1.00           | 1.66 (0.93-2.96)                         | 0.089           |
| Child ill or dead at birth                   | 29                         | 33                       | 2.5                 | 3.0               | 1.00           | 1.20 (0.73-1.96)                         | 0.473           |
| Mother ill or dead at birth                  | 5                          | 6                        | 0.4                 | 0.5               | 1.00           | 1.25 (0.38-4.09)                         | 0.711           |
| <i>Other outcomes</i>                        |                            |                          |                     |                   |                |                                          |                 |
| Delivery in reference center <sup>1</sup>    | 210                        | 185                      | 18.3                | 16.7              | 1.00           | 0.91 (0.76-1.09)                         | 0.316           |
| Long hospital stay after delivery (≥ 3 days) | 46                         | 62                       | 4.0                 | 5.6               | 1.00           | 1.43 (0.97-1.26)                         | 0.059           |
| No delivery data                             | 993                        | 1075                     | 46.4                | 49.2              | 1.00           | 1.06 (1.00-1.13)                         | 0.060           |

<sup>1</sup>Jose Macamo or Mavalane or Central Hospital<sup>2</sup>The estimates were not adjusted for any baseline characteristic because the two groups did not differ from each other at baseline

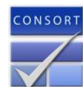

## CONSORT 2010 checklist of information to include when reporting a randomised trial\*

| Section/Topic                    | Item No | Checklist item                                                                                                                                                                              | Reported on page No |
|----------------------------------|---------|---------------------------------------------------------------------------------------------------------------------------------------------------------------------------------------------|---------------------|
| <b>Title and abstract</b>        |         |                                                                                                                                                                                             |                     |
|                                  | 1a      | Identification as a randomised trial in the title                                                                                                                                           | 1                   |
|                                  | 1b      | Structured summary of trial design, methods, results, and conclusions (for specific guidance see CONSORT for abstracts)                                                                     | 2, 3                |
| <b>Introduction</b>              |         |                                                                                                                                                                                             |                     |
| Background and objectives        | 2a      | Scientific background and explanation of rationale                                                                                                                                          | 5,6                 |
|                                  | 2b      | Specific objectives or hypotheses                                                                                                                                                           | 6                   |
| <b>Methods</b>                   |         |                                                                                                                                                                                             |                     |
| Trial design                     | 3a      | Description of trial design (such as parallel, factorial) including allocation ratio                                                                                                        | 6,7                 |
|                                  | 3b      | Important changes to methods after trial commencement (such as eligibility criteria), with reasons                                                                                          | None                |
| Participants                     | 4a      | Eligibility criteria for participants                                                                                                                                                       | 7,8                 |
|                                  | 4b      | Settings and locations where the data were collected                                                                                                                                        | 6,7                 |
| Interventions                    | 5       | The interventions for each group with sufficient details to allow replication, including how and when they were actually administered                                                       | 9,10                |
| Outcomes                         | 6a      | Completely defined pre-specified primary and secondary outcome measures, including how and when they were assessed                                                                          | 10                  |
|                                  | 6b      | Any changes to trial outcomes after the trial commenced, with reasons                                                                                                                       | None                |
| Sample size                      | 7a      | How sample size was determined                                                                                                                                                              | 8,9                 |
|                                  | 7b      | When applicable, explanation of any interim analyses and stopping guidelines                                                                                                                | NA                  |
| <b>Randomisation:</b>            |         |                                                                                                                                                                                             |                     |
| Sequence generation              | 8a      | Method used to generate the random allocation sequence                                                                                                                                      | 8                   |
|                                  | 8b      | Type of randomisation; details of any restriction (such as blocking and block size)                                                                                                         | 8                   |
| Allocation concealment mechanism | 9       | Mechanism used to implement the random allocation sequence (such as sequentially numbered containers), describing any steps taken to conceal the sequence until interventions were assigned | 8                   |
| Implementation                   | 10      | Who generated the random allocation sequence, who enrolled participants, and who assigned participants to interventions                                                                     | 8                   |
| Blinding                         | 11a     | If done, who was blinded after assignment to interventions (for example, participants, care providers, those                                                                                | Not done.           |

|                                                      |     |                                                                                                                                                   |                                           |
|------------------------------------------------------|-----|---------------------------------------------------------------------------------------------------------------------------------------------------|-------------------------------------------|
|                                                      |     | assessing outcomes) and how                                                                                                                       | Pragmatic trial design                    |
|                                                      |     |                                                                                                                                                   | NA                                        |
| Statistical methods                                  | 11b | If relevant, description of the similarity of interventions                                                                                       | 11,12                                     |
|                                                      | 12a | Statistical methods used to compare groups for primary and secondary outcomes                                                                     | Not done                                  |
|                                                      | 12b | Methods for additional analyses, such as subgroup analyses and adjusted analyses                                                                  |                                           |
| <b>Results</b>                                       |     |                                                                                                                                                   |                                           |
| Participant flow (a diagram is strongly recommended) | 13a | For each group, the numbers of participants who were randomly assigned, received intended treatment, and were analysed for the primary outcome    | 13, Figure 1                              |
|                                                      | 13b | For each group, losses and exclusions after randomisation, together with reasons                                                                  | 13, Figure 1                              |
| Recruitment                                          | 14a | Dates defining the periods of recruitment and follow-up                                                                                           | 6,7                                       |
|                                                      | 14b | Why the trial ended or was stopped                                                                                                                | Ended as planned                          |
| Baseline data                                        | 15  | A table showing baseline demographic and clinical characteristics for each group                                                                  | Table 1                                   |
| Numbers analysed                                     | 16  | For each group, number of participants (denominator) included in each analysis and whether the analysis was by original assigned groups           | 13, Tables 2-4                            |
| Outcomes and estimation                              | 17a | For each primary and secondary outcome, results for each group, and the estimated effect size and its precision (such as 95% confidence interval) | 13,14, Tables 2-4                         |
|                                                      | 17b | For binary outcomes, presentation of both absolute and relative effect sizes is recommended                                                       | Table 4                                   |
| Ancillary analyses                                   | 18  | Results of any other analyses performed, including subgroup analyses and adjusted analyses, distinguishing pre-specified from exploratory         | None                                      |
| Harms                                                | 19  | All important harms or unintended effects in each group (for specific guidance see CONSORT for harms)                                             | NA (benefits and harms not distinguished) |
| <b>Discussion</b>                                    |     |                                                                                                                                                   |                                           |
| Limitations                                          | 20  | Trial limitations, addressing sources of potential bias, imprecision, and, if relevant, multiplicity of analyses                                  | 14,15                                     |
| Generalisability                                     | 21  | Generalisability (external validity, applicability) of the trial findings                                                                         | 15                                        |
| Interpretation                                       | 22  | Interpretation consistent with results, balancing benefits and harms, and considering other relevant evidence                                     | 15, 16                                    |
| <b>Other information</b>                             |     |                                                                                                                                                   |                                           |
| Registration                                         | 23  | Registration number and name of trial registry                                                                                                    | 3                                         |
| Protocol                                             | 24  | Where the full trial protocol can be accessed, if available                                                                                       | From Authors                              |
| Funding                                              | 25  | Sources of funding and other support (such as supply of drugs), role of funders                                                                   | 3, 17                                     |

1  
2  
3  
4  
5  
6  
7  
8  
9  
10  
11  
12  
13  
14  
15  
16  
17  
18  
19  
20  
21  
22  
23  
24  
25  
26  
27  
28  
29  
30  
31  
32  
33  
34  
35  
36  
37  
38  
39  
40  
41  
42  
43  
44  
45  
46  
47  
48  
49

\*We strongly recommend reading this statement in conjunction with the CONSORT 2010 Explanation and Elaboration for important clarifications on all the items. If relevant, we also recommend reading CONSORT extensions for cluster randomised trials, non-inferiority and equivalence trials, non-pharmacological treatments, herbal interventions, and pragmatic trials. Additional extensions are forthcoming: for those and for up to date references relevant to this checklist, see [www.consort-statement.org](http://www.consort-statement.org).

For peer review only

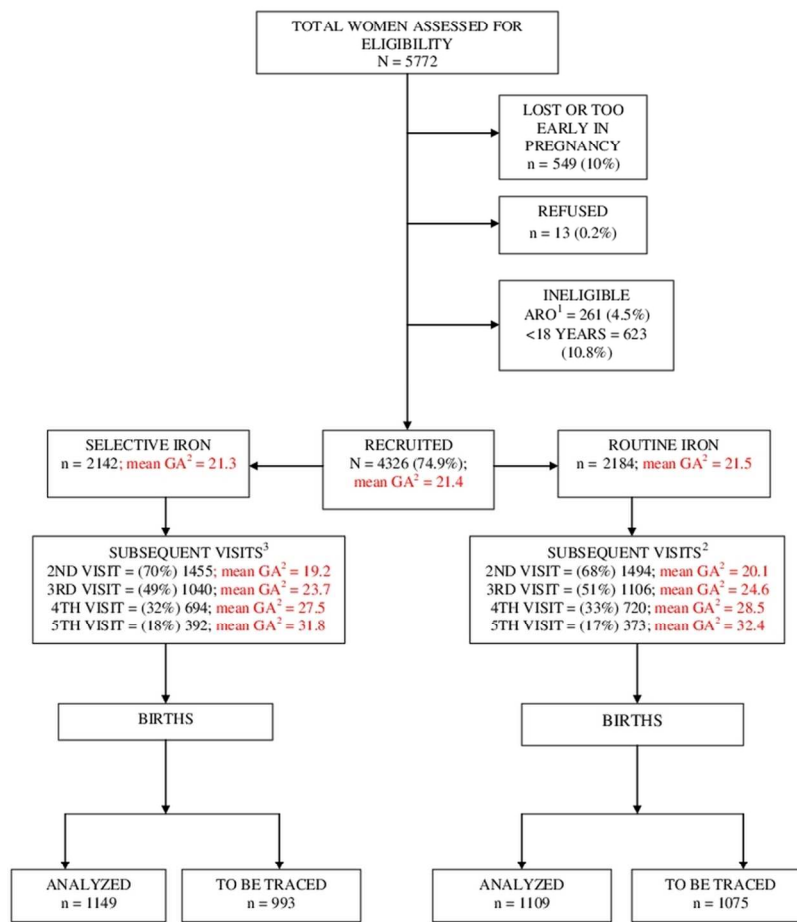

Figure 1. PROFEG Trial Flow Diagram

<sup>1</sup>ARO = high risk pregnancy; <sup>2</sup>GA = gestational age in weeks; <sup>3</sup>After recruitment, % were calculated from recruited, n = 4326

90x127mm (300 x 300 DPI)

### Appendix 1: Baseline assumptions used for power calculations and sample size

The sample size was estimated using various outcomes (see Table), expected reduction (20 and 30%) and power (85 and 90%) and significance level of 5%; the base-line rates were estimated on the basis of literature. Based on these calculations we decided that two thousand women were needed in each trial arm (4000 in total). Example calculations are shown in the table below.

|                                                                |      |     |      |      |
|----------------------------------------------------------------|------|-----|------|------|
| Power                                                          | 85%  | 85% | 90%  | 90%  |
| Expected reduction (with intervention)                         | 20%  | 30% | 20%  | 30%  |
| Preterm delivery (iron group = 18%)                            | 805  | 341 | 2197 | 931  |
| Low birth weight rate (iron group = 14%)                       | 1079 | 457 | 2947 | 1246 |
| Malaria reactivation (estimated incidence in iron group = 20%) | 709  | 301 | 1935 | 821  |
| Perinatal mortality (iron group = 3.4%)                        | 353  | 152 | 926  | 413  |



## CONSORT 2010 checklist of information to include when reporting a randomised trial\*

| Section/Topic                    | Item No | Checklist item                                                                                                                                                                              | Reported on page No |
|----------------------------------|---------|---------------------------------------------------------------------------------------------------------------------------------------------------------------------------------------------|---------------------|
| <b>Title and abstract</b>        |         |                                                                                                                                                                                             |                     |
|                                  | 1a      | Identification as a randomised trial in the title                                                                                                                                           | 1                   |
|                                  | 1b      | Structured summary of trial design, methods, results, and conclusions (for specific guidance see CONSORT for abstracts)                                                                     | 2, 3                |
| <b>Introduction</b>              |         |                                                                                                                                                                                             |                     |
| Background and objectives        | 2a      | Scientific background and explanation of rationale                                                                                                                                          | 5,6                 |
|                                  | 2b      | Specific objectives or hypotheses                                                                                                                                                           | 6                   |
| <b>Methods</b>                   |         |                                                                                                                                                                                             |                     |
| Trial design                     | 3a      | Description of trial design (such as parallel, factorial) including allocation ratio                                                                                                        | 7                   |
|                                  | 3b      | Important changes to methods after trial commencement (such as eligibility criteria), with reasons                                                                                          | None                |
| Participants                     | 4a      | Eligibility criteria for participants                                                                                                                                                       | 7                   |
|                                  | 4b      | Settings and locations where the data were collected                                                                                                                                        | 6                   |
| Interventions                    | 5       | The interventions for each group with sufficient details to allow replication, including how and when they were actually administered                                                       | 8                   |
| Outcomes                         | 6a      | Completely defined pre-specified primary and secondary outcome measures, including how and when they were assessed                                                                          | 9                   |
|                                  | 6b      | Any changes to trial outcomes after the trial commenced, with reasons                                                                                                                       | None                |
| Sample size                      | 7a      | How sample size was determined                                                                                                                                                              | 7,8                 |
|                                  | 7b      | When applicable, explanation of any interim analyses and stopping guidelines                                                                                                                | NA                  |
| <b>Randomisation:</b>            |         |                                                                                                                                                                                             |                     |
| Sequence generation              | 8a      | Method used to generate the random allocation sequence                                                                                                                                      | 7                   |
|                                  | 8b      | Type of randomisation; details of any restriction (such as blocking and block size)                                                                                                         | 7                   |
| Allocation concealment mechanism | 9       | Mechanism used to implement the random allocation sequence (such as sequentially numbered containers), describing any steps taken to conceal the sequence until interventions were assigned | 7                   |
| Implementation                   | 10      | Who generated the random allocation sequence, who enrolled participants, and who assigned participants to interventions                                                                     | 6,7                 |
| Blinding                         | 11a     | If done, who was blinded after assignment to interventions (for example, participants, care providers, those                                                                                | Not done.           |

|    |                          |                                                             |                                                                                                                  |
|----|--------------------------|-------------------------------------------------------------|------------------------------------------------------------------------------------------------------------------|
| 1  |                          |                                                             |                                                                                                                  |
| 2  |                          | assessing outcomes) and how                                 | Pragmatic                                                                                                        |
| 3  |                          |                                                             | trial design                                                                                                     |
| 4  |                          |                                                             | NA                                                                                                               |
| 5  | 11b                      | If relevant, description of the similarity of interventions | NA                                                                                                               |
| 6  | Statistical methods      | 12a                                                         | Statistical methods used to compare groups for primary and secondary outcomes                                    |
| 7  |                          | 12b                                                         | Methods for additional analyses, such as subgroup analyses and adjusted analyses                                 |
| 8  |                          |                                                             | Not done                                                                                                         |
| 9  | <b>Results</b>           |                                                             |                                                                                                                  |
| 10 | Participant flow (a      | 13a                                                         | For each group, the numbers of participants who were randomly assigned, received intended treatment, and         |
| 11 | diagram is strongly      |                                                             | were analysed for the primary outcome                                                                            |
| 12 | recommended)             | 13b                                                         | For each group, losses and exclusions after randomisation, together with reasons                                 |
| 13 | Recruitment              | 14a                                                         | Dates defining the periods of recruitment and follow-up                                                          |
| 14 |                          | 14b                                                         | Why the trial ended or was stopped                                                                               |
| 15 |                          |                                                             | Ended as                                                                                                         |
| 16 |                          |                                                             | planned                                                                                                          |
| 17 | Baseline data            | 15                                                          | A table showing baseline demographic and clinical characteristics for each group                                 |
| 18 | Numbers analysed         | 16                                                          | For each group, number of participants (denominator) included in each analysis and whether the analysis was      |
| 19 |                          |                                                             | by original assigned groups                                                                                      |
| 20 | Outcomes and             | 17a                                                         | For each primary and secondary outcome, results for each group, and the estimated effect size and its            |
| 21 | estimation               |                                                             | precision (such as 95% confidence interval)                                                                      |
| 22 |                          | 17b                                                         | For binary outcomes, presentation of both absolute and relative effect sizes is recommended                      |
| 23 | Ancillary analyses       | 18                                                          | Results of any other analyses performed, including subgroup analyses and adjusted analyses, distinguishing       |
| 24 |                          |                                                             | pre-specified from exploratory                                                                                   |
| 25 | Harms                    | 19                                                          | All important harms or unintended effects in each group (for specific guidance see CONSORT for harms)            |
| 26 |                          |                                                             | NA (benefits                                                                                                     |
| 27 |                          |                                                             | and harms                                                                                                        |
| 28 |                          |                                                             | not                                                                                                              |
| 29 |                          |                                                             | distinguished)                                                                                                   |
| 30 |                          |                                                             |                                                                                                                  |
| 31 |                          |                                                             |                                                                                                                  |
| 32 | <b>Discussion</b>        |                                                             |                                                                                                                  |
| 33 | Limitations              | 20                                                          | Trial limitations, addressing sources of potential bias, imprecision, and, if relevant, multiplicity of analyses |
| 34 | Generalisability         | 21                                                          | Generalisability (external validity, applicability) of the trial findings                                        |
| 35 | Interpretation           | 22                                                          | Interpretation consistent with results, balancing benefits and harms, and considering other relevant evidence    |
| 36 |                          |                                                             | 13, 14                                                                                                           |
| 37 |                          |                                                             | 13, 14                                                                                                           |
| 38 | <b>Other information</b> |                                                             |                                                                                                                  |
| 39 | Registration             | 23                                                          | Registration number and name of trial registry                                                                   |
| 40 | Protocol                 | 24                                                          | Where the full trial protocol can be accessed, if available                                                      |
| 41 | Funding                  | 25                                                          | Sources of funding and other support (such as supply of drugs), role of funders                                  |
| 42 |                          |                                                             | 3                                                                                                                |
| 43 |                          |                                                             | From Authors                                                                                                     |
| 44 |                          |                                                             | 3, 15.                                                                                                           |



1  
2  
3  
4 \*We strongly recommend reading this statement in conjunction with the CONSORT 2010 Explanation and Elaboration for important clarifications on all the items. If relevant, we also  
5 recommend reading CONSORT extensions for cluster randomised trials, non-inferiority and equivalence trials, non-pharmacological treatments, herbal interventions, and pragmatic trials.  
6 Additional extensions are forthcoming: for those and for up to date references relevant to this checklist, see [www.consort-statement.org](http://www.consort-statement.org).  
7  
8  
9  
10  
11  
12  
13  
14  
15  
16  
17  
18  
19  
20  
21  
22  
23  
24  
25  
26  
27  
28  
29  
30  
31  
32  
33  
34  
35  
36  
37  
38  
39  
40  
41  
42  
43  
44  
45  
46  
47  
48  
49

For peer review only
